# Supplementary material for: Differential Expression of Iron Acquisition Genes by Brucella melitensis and Brucella canis during Macrophage Infection
Source: PLoS One. 2012 Mar 5;7(3):e31747. doi: 10.1371/journal.pone.0031747 (PMC3293887; doi:10.1371/journal.pone.0031747)
Supplement: Table S1 — Brucella Genome Directed Primers. (XLS) [file pone.0031747.s002.xls]

## Sheet: Sheet1
Table S 1. Genome Directed Primers
CGGCAAGC
CCAGCGCC
GCGCCAGC
CGCCGCGC
GCGCGCGC
GCGCCGCC
GCCGCCGC
CGCCGCCA
CGCGCCGC
CCTTGCCG
GCGCGCCG
GCCGCGCG
GCCAGCGC
GCCGGAAA
CGCCGCCG
CGGCGGCA
CCGCGCCG
GCCGCCAT
TGCCGCCG
GCGGCGCG
CGCCAGCG
CCGCCGCC
TCCAGCGC
GGCGGCAA
GCGCAGGC
CGCGCGCA
TTGCCGCC
CGGCGCGC
TGCCGCGC
TCGGCAAG
CGGCAGGC
TTCCAGCG
GCGCGCCA
CCAGAAGC
CGATCAGC
CGCGCGGC
GGCAAGCG
CGATGCCG
TTCGGCAA
CCGCGCGC
GCCGCGCC
CCAGATCG
ATCGGCAA
TCGCCGCC
GCGCGGCA
GCGCGCGG
CCAGCGCA
CAGCGCCT
AGCGCCAG
GCGGATCG
CAGCGCCA
GCGCGGCG
GCAAGCGC
CATCGGCA
GCGGCGGC
CGCGCGCC
GCCCGGCA
CGCCCGGC
GCGGCAAG
CGCCCGCC
GCTTGCCG
CTTCCGGC
CTTCCAGC
GGCGCGGC
GCCGCCGA
CAGCGCCG
GCGCATCG
GCTTGCGC
GGCGCGCA
CAAGCGCC
TTCCGGCA
CGATGCGC
GCCGATCA
GCGGCGCA
CGGCGGCG
AGCGCGCC
CGGCGCGG
CGGCCAGC
GCGCCTTG
GCGGCAGG
CTTGCCGC
GATCGGCA
TTCCGGCG
CCGCCAGC
CGGCATCG
TGCCGCCA
GCCATGGC
TTCCAGAA
GCATCGGC
GCCAAGCG
GCCTGCGC
CCAGCGCG
GCCGATGA
CGCCAAGC
GCCGCCCG
AGATCGGC
GCGCCCGC
CGATATCG
GCTTCGGC
TGCGCGCC
CGGCAGCG
ATGCCGCC
CGATGATG
GCCGCCGG
CGCCAGCA
CGGCAATC
CCTTGCGC
CGCGCCCG
CGGAAAGC
CCATGCCG
CTTCGGCA
CGGCAAGG
GCGGCAGC
GCCCGCGC
CGGCCTTG
CCGCATCG
CGCCCTTG
CAAGGCCG
CGCCATCG
CCGGCAGG
GCGCGCAT
GCAGGCGC
CCTTCGGC
CCAGAATG
TTTCCGGC
GCCGATGG
AAGCGCCA
GCCTGCCG
TGATGCCG
CCTTGTCG
CGGCCAGA
CGCCAGAA
TCAGCGCC
GGCAAGGC
CCTTGCGG
AGCGCCTT
CGCAGGCG
ATGCGCGC
GCAGGCCG
GCGCGCAA
CCGCCATG
GCGCCGAT
CGATGCGG
TCTTCCAG
GCGCAGCG
GGCGGCGC
GGCGGCAG
CGCCTTCA
CATTGCCG
CGAGCGCG
AAGCGCGC
GGCCAGAA
GCGGCGAT
GCCCGCCA
CACCAGCG
GCAATGGC
CCGCGCCA
CAATGCCG
TTCCAGCC
CGCCTTCG
TGGCAAGC
CCAGAACC
GGCGGCGA
TTTTCCAG
GCGCGAAA
CGAGATCG
ATGGCGGC
CTGCCGCC
TTCGGCCA
CGGCGATG
CGGCTTCG
GCGCAGCA
CGCCTGCC
GCGGCTGC
GCACCAGC
GGAAAGCG
CTTCCGCC
GCCTTCGC
CGCCATTG
CGAAAGCG
CGGCCTGC
GCGGGCGC
GCCGCCAA
CCGCGCGG
GCCGCCTT
CGCCGCCT
GCGGCAAT
GCATTGGC
TTGCGGAT
CCTTGATG
GCTTTTCC
GATGATCG
TTGGCCAT
CATGACAA
ACAATCAA
AAGCACAT
AGTGACAT
GCAATCAC
AATTAGAT
AAGGCCTT
ATTAGCAC
TTTGCCAA
ACTAACAA
CCGAACAT
ATAGGCAA
GTAACCAT
