# Supplementary material for: Differential Expression of Iron Acquisition Genes by Brucella melitensis and Brucella canis during Macrophage Infection
Source: PLoS One. 2012 Mar 5;7(3):e31747. doi: 10.1371/journal.pone.0031747 (PMC3293887; doi:10.1371/journal.pone.0031747)
Supplement: Table S6 — Gene expression profile of intracellular B. melitensis at 24 h compared to B. melitensis grown in broth. (XLS) [file pone.0031747.s007.xls]

## Sheet: Sheet1
Supplementary Table 6 Gene expression profile of intracellular B. melitensis at 24 h compared to B. melitensis grown in broth.
Locus_tag	Locus	Product Name	Fold Change	log2ratio	GG_Significant	Control_Signal	RAW_Signal
BMEI0001	hemE	uroporphyrinogen decarboxylase	0.99173	-0.0119813	0.0447567	3379.03	3351.09
BMEI0002	-	CYTOCHROME FUNCTIONING/ASSEMBLY RELATED PROTEIN	0.908007	-0.139224	0.0470357	3857.73	3502.85
BMEI0003	rho	transcription termination factor Rho	0.819583	-0.287038	0.0809113	3620.24	2967.09
BMEI0004	-	Hypothetical Cytosolic Protein	1.09373	0.129252	0.0349925	611.221	668.508
BMEI0005	-	THYMIDYLATE KINASE	1.22591	0.293856	0.0828512	733.681	899.428
BMEI0006	trmE	tRNA modification GTPase TrmE	1.02288	0.0326419	0.039613	711.699	727.985
BMEI0007	-	tRNA uridine 5-carboxymethylaminomethyl modification enzyme GidA	1.11822	0.161203	0.0717051	979.153	1094.91
BMEI0008	gidB	glucose-inhibited division protein B	1.14045	0.189604	0.0740905	929.127	1059.62
BMEI0009	-	CHROMOSOME PARTITIONING PROTEIN PARA	1.45693	0.542929	0.222597	3867.91	5635.27
BMEI0010	-	CHROMOSOME PARTITIONING PROTEIN PARB	1.31463	0.394661	0.160574	2122.65	2790.5
BMEI0011	holA	DNA polymerase III subunit delta	1.04401	0.0621367	0.0359821	661.379	690.487
BMEI0012	-	ABC TRANSPORTER ATP-BINDING PROTEIN	1.11038	0.151048	0.0766704	1158.68	1286.57
BMEI0013	-	ABC TRANSPORTER INTEGRAL MEMBRANE PROTEIN	1.18657	0.246792	0.0991068	1692.97	2008.82
BMEI0014	-	hypothetical protein BMEI0014	0.979698	-0.0295906	0.0303783	634.747	621.86
BMEI0015	-	ABC TRANSPORTER SUBSTRATE-BINDING PROTEIN	0.876542	-0.190105	0.0413603	4937.81	4328.2
BMEI0016	-	hypothetical protein BMEI0016	1.32566	0.406713	0.191981	1193.51	1582.18
BMEI0017	-	ALKANAL MONOOXYGENASE ALPHA CHAIN	0.997196	-0.00405124	0.0682744	1535.02	1530.71
BMEI0018	-	Hypothetical Cytosolic Protein	1.18578	0.24583	0.0756155	791.837	938.94
BMEI0019	-	LACI-FAMILY TRANSCRIPTION REGULATOR	1.18328	0.242795	0.0887532	951.05	1125.36
BMEI0020	-	GLUCOSE-FRUCTOSE OXIDOREDUCTASE PRECURSOR	1.0634	0.0886838	0.0368855	654.774	696.287
BMEI0021	-	ACETYL-COA:ACETOACETYL-COA TRANSFERASE ALPHA SUBUNIT	1.19151	0.25279	0.0836896	850.782	1013.71
BMEI0022	-	3-HYDROXYBUTYRYL-COA DEHYDRATASE	1.03164	0.0449464	0.0554595	907.17	935.877
BMEI0023	-	3-HYDROXYBUTYRYL-COA DEHYDRATASE	1.01685	0.0241068	0.0163647	493.479	501.794
BMEI0024	-	L-SORBOSONE DEHYDROGENASE, NAD(P) DEPENDENT	1.21025	0.275307	0.0508203	577.956	699.472
BMEI0025	-	L-sorbose dehydrogenase (FAD)	1.21775	0.284224	0.0861607	781.599	951.796
BMEI0026	fabG	3-ketoacyl-(acyl-carrier-protein) reductase	1.21201	0.277396	0.0510029	576.503	698.724
BMEI0027	-	L-SORBOSE DEHYDROGENASE	1.06683	0.0933276	0.0360819	644.542	687.615
BMEI0029	-	L-SORBOSE DEHYDROGENASE	1.79149	0.841161	0.911662	929.202	1664.66
BMEI0030	-	Hypothetical Cytosolic Protein	2.5485	1.34965	0.999953	1915.74	4882.27
BMEI0031	-	Hypothetical Cytosolic Protein	1.21269	0.278213	0.107851	1077.14	1306.23
BMEI0032	-	3-OXOACYL-(ACYL-CARRIER PROTEIN) REDUCTASE	0.979198	-0.030328	0.065445	1192.6	1167.79
BMEI0033	-	N-ACYL-L-AMINO ACID AMIDOHYDROLASE	1.2002	0.263275	0.086782	849.14	1019.14
BMEI0035	-	D-ALANYL-D-ALANINE CARBOXYPEPTIDASE	1.05703	0.0800142	0.0652486	2066	2183.83
BMEI0036	-	COBW PROTEIN	0.965754	-0.0502727	0.06337	1104.75	1066.92
BMEI0037	-	Hypothetical Transcriptional Regulatory Protein	1.04337	0.0612498	0.0500533	815.246	850.602
BMEI0038	-	hypothetical protein BMEI0038	1.56732	0.648302	0.204419	7949	12458.6
BMEI0039	-	acetyl-CoA carboxylase carboxyltransferase subunit alpha	0.586431	-0.769966	0.828236	2691.56	1578.42
BMEI0040	xerD	site-specific tyrosine recombinase XerD	0.781939	-0.354872	0.153361	1719.78	1344.77
BMEI0041	-	hypothetical protein BMEI0041	0.698777	-0.517096	0.331749	1997.8	1396.02
BMEI0042	-	SHIKIMATE KINASE	1.10437	0.14323	0.0663778	933.977	1031.46
BMEI0043	aroB	3-dehydroquinate synthase	0.936256	-0.0950244	0.0683674	2056.75	1925.64
BMEI0044	-	CBS domain containing protein	1.00558	0.00802315	0.0254098	581.534	584.777
BMEI0045	-	BOLA PROTEIN	0.768561	-0.379769	0.156127	1247.43	958.728
BMEI0046	-	hypothetical protein BMEI0046	0.530393	-0.914867	0.964447	2838.25	1505.38
BMEI0047	-	Molecular chaperones (DnaJ family)	0.705796	-0.502677	0.19913	4795.59	3384.71
BMEI0048	-	hypothetical protein BMEI0048	0.927377	-0.108773	0.0407009	4169.73	3866.91
BMEI0049	-	COBS PROTEIN	0.619569	-0.690664	0.553325	5260.64	3259.33
BMEI0050	-	COBT PROTEIN	0.976324	-0.0345681	0.058248	989.631	966.201
BMEI0051	-	hypothetical protein BMEI0051	1.43873	0.5248	0.197632	3921.02	5641.31
BMEI0052	-	hypothetical protein BMEI0052	1.33892	0.421072	0.133894	3238.31	4335.84
BMEI0053	-	CATION-TRANSPORTING ATPASE PACS	1.37278	0.457104	0.174493	2951.41	4051.65
BMEI0054	-	MERCURIC RESISTANCE OPERON REGULATORY PROTEIN	0.381322	-1.39092	0.999981	3130.88	1193.88
BMEI0055	-	hypothetical protein BMEI0055	0.812786	-0.299052	0.117545	2138.77	1738.36
BMEI0056	rpmB	50S ribosomal protein L28	0.794651	-0.331607	0.00548002	29048.3	23083.2
BMEI0057	-	Hypothetical Membrane Spanning Protein	0.778422	-0.361376	0.122455	3293.91	2564.05
BMEI0058	-	EXTRACELLULAR SERINE PROTEASE	1.00021	0.000306146	0.0678452	1367.41	1367.7
BMEI0059	-	hypothetical protein BMEI0059	0.927585	-0.108448	0.0476838	803.117	744.959
BMEI0060	-	hypothetical protein BMEI0060	1.09206	0.127054	0.0559015	815.656	890.747
BMEI0061	-	hypothetical protein BMEI0061	1.16867	0.224863	0.0877681	1967.53	2299.39
BMEI0062	-	hypothetical protein BMEI0062	1.1901	0.251084	0.10176	1607.53	1913.13
BMEI0063	-	Hypothetical Membrane Spanning Protein	1.2226	0.289953	0.106989	2014.02	2462.34
BMEI0064	-	hypothetical protein BMEI0064	1.59195	0.670794	0.604009	835.29	1329.74
BMEI0065	-	Hypothetical Cytosolic Protein	1.08973	0.123977	0.050993	763.618	832.141
BMEI0066	-	TWO COMPONENT RESPONSE REGULATOR	0.768884	-0.379162	0.139553	3097.54	2381.65
BMEI0067	-	CAMP-DEPENDENT PROTEIN KINASE REGULATORY SUBUNIT	0.944103	-0.0829836	0.0662601	1148.35	1084.16
BMEI0068	-	EXODEOXYRIBONUCLEASE III	1.11195	0.153087	0.0700837	973.566	1082.55
BMEI0069	-	OUTER MEMBRANE LIPOPROTEINS CARRIER PROTEIN PRECURSOR	1.26343	0.337347	0.0320935	7657.79	9675.09
BMEI0070	-	aquaporin Z	3.16794	1.66354	1	5188.92	16438.2
BMEI0072	-	CELL DIVISION ATP-BINDING PROTEIN FTSE	1.50393	0.58874	0.461793	1517.62	2282.4
BMEI0073	-	CELL DIVISION PROTEIN FTSX	1.42999	0.516008	0.297227	2062.6	2949.5
BMEI0074	-	hypothetical protein BMEI0074	1.21329	0.27893	0.0805658	2884.62	3499.89
BMEI0075	-	1-ACYL-SN-GLYCEROL-3-PHOSPHATE ACYLTRANSFERASE	0.74553	-0.423662	0.192626	2598.44	1937.22
BMEI0076	-	inorganic pyrophosphatase	1.01952	0.0278862	0.00602902	14797.8	15086.6
BMEI0077	-	CATION TRANSPORT PROTEIN CHAC	1.0106	0.0152185	0.0633532	1108.48	1120.23
BMEI0078	-	hypothetical protein BMEI0078	0.794342	-0.332169	0.121973	1151.23	914.47
BMEI0079	-	cyclohexadienyl dehydrogenase	0.834343	-0.261287	0.10577	1873.43	1563.09
BMEI0080	-	histidinol-phosphate aminotransferase	0.848035	-0.237804	0.0880009	2486.2	2108.38
BMEI0081	-	METHYLTRANSFERASE	1.028	0.0398458	0.0490922	818.047	840.955
BMEI0082	-	hypoxanthine-guanine phosphoribosyltransferase	1.26292	0.336764	0.0995692	2915.34	3681.84
BMEI0083	-	hypothetical protein BMEI0083	1.02182	0.0311375	0.0685886	1404.18	1434.81
BMEI0084	-	DIAMINOPIMELATE DECARBOXYLASE	0.933925	-0.0986208	0.0623806	1026.76	958.914
BMEI0085	-	hypothetical protein BMEI0085	0.92981	-0.104991	0.0733983	1628.55	1514.24
BMEI0086	-	argininosuccinate lyase	1.05731	0.080392	0.0687442	1817.11	1921.24
BMEI0087	-	THIOL:DISULFIDE INTERCHANGE PROTEIN TLPA	0.676147	-0.56459	0.327371	4063.51	2747.53
BMEI0088	-	hypothetical protein BMEI0088	0.76986	-0.377332	0.165715	1477.45	1137.43
BMEI0089	-	RIBONUCLEASE BN	0.669839	-0.578114	0.434801	2429.96	1627.68
BMEI0090	-	short chain dehydrogenase	1.03075	0.0436982	0.0618492	1036.03	1067.89
BMEI0091	-	hypothetical protein BMEI0091	1.27031	0.34518	0.0847139	637.733	810.118
BMEI0092	-	ADENOSYLCOBALAMIN-DEPENDENT DIOL DEHYDRATASE GAMMA SUBUNIT	1.05756	0.0807462	0.0333258	626.978	663.07
BMEI0093	-	EXSD PROTEIN	1.11682	0.159402	0.056802	778.147	869.053
BMEI0094	-	VACUOLAR ATP SYNTHASE 16 KD PROTEOLIPID SUBUNIT	1.20182	0.265217	0.108376	1367.83	1643.88
BMEI0095	-	SUCCINOGLYCAN BIOSYNTHESIS REGULATOR	1.43037	0.516383	0.296811	873.89	1249.98
BMEI0096	-	ELECTRON TRANSFER FLAVOPROTEIN BETA-SUBUNIT	0.737479	-0.439325	0.117195	5536	4082.69
BMEI0097	-	ELECTRON TRANSFER FLAVOPROTEIN ALPHA-SUBUNIT	0.709708	-0.494703	0.254161	3192.68	2265.87
BMEI0098	-	hypothetical protein BMEI0098	0.894832	-0.160311	0.0788372	1924.92	1722.48
BMEI0099	-	3-hydroxybutyryl-CoA dehydrogenase	0.908715	-0.1381	0.0534013	3364.3	3057.19
BMEI0100	-	hypothetical protein BMEI0100	0.933794	-0.0988238	0.00707415	14588.9	13623
BMEI0101	-	CYSTEINE SYNTHASE A	1.27954	0.355627	0.0857927	3718.15	4757.52
BMEI0102	-	Universal stress protein family	0.382698	-1.38572	0.999909	16615.7	6358.78
BMEI0103	-	methionine gamma-lyase	0.936962	-0.0939373	0.0467878	799.302	748.916
BMEI0104	-	GLUCARATE TRANSPORTER	0.908832	-0.137915	0.0695561	1110.63	1009.38
BMEI0105	-	L-ASPARAGINASE II	0.899852	-0.152241	0.0667783	1020.86	918.621
BMEI0106	-	TRANSCRIPTIONAL REGULATOR, GNTR FAMILY	0.849186	-0.235847	0.0942934	1302.04	1105.68
BMEI0107	-	L-ASPARAGINASE	1.18109	0.240125	0.0643506	711.748	840.642
BMEI0108	-	ASPARAGINE TRANSPORT ATP-BINDING PROTEIN	1.05097	0.0717264	0.0506552	814.057	855.552
BMEI0109	aspA	aspartate ammonia-lyase	1.10125	0.139146	0.0418044	660.581	727.467
BMEI0110	-	AGMATINASE	1.11298	0.154432	0.0497228	715.282	796.097
BMEI0111	-	ASPARAGINE TRANSPORT ATP-BINDING PROTEIN	1.07997	0.110989	0.0227817	521.922	563.659
BMEI0112	-	ASPARAGINE TRANSPORT SYSTEM PERMEASE PROTEIN	1.16118	0.215587	0.0690667	799.898	928.823
BMEI0113	-	ASPARAGINE TRANSPORT SYSTEM PERMEASE PROTEIN	1.0941	0.129744	0.0380805	636.606	696.51
BMEI0114	-	ASPARAGINE-BINDING PERIPLASMIC PROTEIN PRECURSOR	0.990027	-0.0144604	0.0276639	606.967	600.913
BMEI0115	-	ASPARAGINE-BINDING PERIPLASMIC PROTEIN PRECURSOR	0.901682	-0.14931	0.0725969	1153.82	1040.38
BMEI0116	-	TRANSCRIPTIONAL REGULATORY PROTEIN, LYSR FAMILY	0.971118	-0.0422819	0.0444048	3485.66	3384.98
BMEI0117	-	hypothetical protein BMEI0117	1.87713	0.908528	0.957562	865.223	1624.13
BMEI0118	-	INTEGRAL MEMBRANE PROTEIN	0.597874	-0.742086	0.590853	7401.79	4425.34
BMEI0119	-	hypothetical protein BMEI0119	0.864553	-0.209974	0.0704815	956.954	827.337
BMEI0120	-	hypothetical protein BMEI0120	0.910008	-0.136048	0.0729565	2081.44	1894.13
BMEI0121	secA	preprotein translocase subunit SecA	1.01086	0.0155788	0.0683563	1535.65	1552.33
BMEI0122	-	hypothetical protein BMEI0122	1.01858	0.0265537	0.0446146	769.779	784.078
BMEI0123	-	PEPTIDYL-PROLYL CIS-TRANS ISOMERASE	0.752913	-0.409445	0.191325	2162.84	1628.43
BMEI0124	argJ	bifunctional ornithine acetyltransferase/N-acetylglutamate synthase protein	1.02155	0.0307546	0.0686023	1554.96	1588.46
BMEI0125	-	ACETYLTRANSFERASE	0.996111	-0.00562128	0.0607611	1045.75	1041.69
BMEI0126	-	MUTATOR MUTT PROTEIN (7,8-DIHYDRO-8-OXOGUANINE-TRIPHOSPHATASE) (8-OXO-DGTPASE)	0.99709	-0.00420463	0.0670815	1293.9	1290.14
BMEI0127	-	hypothetical protein BMEI0127	0.716642	-0.480675	0.268835	1477.71	1058.99
BMEI0128	-	hypothetical protein BMEI0128	0.746314	-0.422146	0.196442	2429.81	1813.4
BMEI0129	-	HYDROXYACYLGLUTATHIONE HYDROLASE, MITOCHONDRIAL	0.878911	-0.186211	0.0592142	3440.24	3023.67
BMEI0130	-	intracellular septation protein A	0.867557	-0.204969	0.0832299	2264.8	1964.85
BMEI0131	-	SIGNAL RECOGNITION PARTICLE RECEPTOR FTSY	0.78159	-0.355517	0.148511	1400.5	1094.61
BMEI0132	-	Fe-S OXIDOREDUCTASE	0.791659	-0.337049	0.128045	2553.12	2021.2
BMEI0133	dapF	diaminopimelate epimerase	0.796643	-0.327994	0.135637	1925.19	1533.69
BMEI0134	-	hypothetical protein BMEI0134	1.02143	0.030593	0.0620278	1055.65	1078.27
BMEI0135	-	OUTER MEMBRANE LIPOPROTEIN	1.29857	0.376921	0.0752623	4576.83	5943.33
BMEI0136	-	PUTATIVE ATPASE N2B	1.05456	0.0766457	0.0675244	1893.66	1996.99
BMEI0137	-	malate dehydrogenase	0.926019	-0.110887	0.0507312	3347.71	3100.04
BMEI0138	sucC	succinyl-CoA synthetase subunit beta	1.00653	0.00938393	0.031085	4720.66	4751.47
BMEI0139	-	succinyl-CoA synthetase subunit alpha	1.16777	0.223761	0.0622163	3177.46	3710.56
BMEI0140	kgd	alpha-ketoglutarate decarboxylase	0.880418	-0.18374	0.05607	3624.42	3191.01
BMEI0141	-	dihydrolipoamide acetyltransferase	0.859894	-0.21777	0.0770173	2779.31	2389.91
BMEI0142	-	Hypothetical Membrane Spanning Protein	1.03957	0.0559836	0.0267272	5352.31	5564.08
BMEI0143	-	THREONINE EFFLUX PROTEIN	0.986562	-0.0195183	0.068399	1452.02	1432.51
BMEI0144	-	hypothetical protein BMEI0144	0.998604	-0.0020156	0.0629742	2089.29	2086.37
BMEI0145	-	dihydrolipoamide dehydrogenase	0.764604	-0.387215	0.0995048	4849.7	3708.1
BMEI0146	-	hypothetical protein BMEI0146	1.20689	0.2713	0.109542	1231.5	1486.29
BMEI0147	xerC	site-specific tyrosine recombinase XerC	1.00298	0.00428823	0.0623916	1086.04	1089.27
BMEI0148	rimM	16S rRNA-processing protein	1.06137	0.0859289	0.0420934	3662.36	3887.12
BMEI0149	trmD	tRNA (guanine-N(1)-)-methyltransferase	0.945283	-0.0811811	0.0699712	1810.41	1711.35
BMEI0150	-	TRANSCRIPTIONAL REGULATOR, ARSR FAMILY	1.12831	0.174161	0.0720156	943.83	1064.93
BMEI0151	-	hypothetical protein BMEI0151	0.959351	-0.0598701	0.0491832	839.388	805.267
BMEI0152	-	Hypothetical Cytosolic Protein	0.990055	-0.0144196	0.045951	798.837	790.892
BMEI0153	-	hypothetical protein BMEI0153	1.20418	0.268048	0.0746244	733.664	883.461
BMEI0154	-	Hypothetical Membrane Spanning Protein	1.05015	0.0705983	0.060442	968.015	1016.56
BMEI0155	-	PUTATIVE ALLANTOIN PERMEASE	1.28728	0.364321	0.154724	1100.49	1416.63
BMEI0156	rplS	50S ribosomal protein L19	1.0136	0.0194925	0.0297404	4890.62	4957.15
BMEI0157	-	isopropylmalate isomerase large subunit	0.681894	-0.55238	0.339554	3376.86	2302.66
BMEI0158	-	ACETYLTRANSFERASE	0.939312	-0.090324	0.069239	1953.05	1834.53
BMEI0159	-	SUCCINATE DEHYDROGENASE CYTOCHROME B-556 SUBUNIT	0.886836	-0.17326	0.0490985	4028.46	3572.59
BMEI0160	-	SUCCINATE DEHYDROGENASE HYDROPHOBIC MEMBRANE ANCHOR PROTEIN	0.86355	-0.211649	0.0382361	5599.46	4835.41
BMEI0161	sdhA	succinate dehydrogenase flavoprotein subunit	0.988451	-0.016759	0.015139	8220.58	8125.64
BMEI0162	sdhB	succinate dehydrogenase iron-sulfur subunit	0.862146	-0.213997	0.0246603	7884.78	6797.83
BMEI0163	-	hypothetical protein BMEI0163	0.962451	-0.0552155	0.0688877	1354.28	1303.43
BMEI0164	-	PROBABLE LACTOYLGLUTATHIONE LYASE	0.765421	-0.385675	0.154452	1178.4	901.97
BMEI0165	-	2-octaprenyl-6-methoxyphenyl hydroxylase	0.859094	-0.219111	0.0915772	1950.28	1675.47
BMEI0166	-	ACYL-COA THIOESTERASE II	0.868842	-0.202835	0.0606997	858.606	745.993
BMEI0167	-	AMMONIUM TRANSPORTER	1.34443	0.42699	0.198938	981.704	1319.83
BMEI0168	-	CELL DIVISION PROTEIN FTSK	1.5578	0.639506	0.570514	1541.02	2400.6
BMEI0169	-	TRANSCRIPTIONAL REGULATOR, GNTR FAMILY / AMINOTRANSFERASE CLASS-I	1.45362	0.539653	0.329233	846.627	1230.68
BMEI0170	-	TRANSPORTER, DME FAMILY	1.16263	0.217391	0.0860673	1029.38	1196.79
BMEI0171	-	RIBOSOMAL PROTEIN L11 METHYLTRANSFERASE	1.20917	0.274015	0.109507	1177.6	1423.92
BMEI0172	-	hypothetical protein BMEI0172	0.967702	-0.0473659	0.0604103	2364.26	2287.89
BMEI0173	-	YciI-like protein	0.880543	-0.183535	0.0698107	2767.09	2436.54
BMEI0174	-	GLYCEROL-3-PHOSPHATE DEHYDROGENASE (NAD(P)+)	1.1301	0.176448	0.0799282	1111.6	1256.21
BMEI0175	-	O-sialoglycoprotein endopeptidase	1.08523	0.117996	0.0691942	1064.89	1155.65
BMEI0176	hemC	porphobilinogen deaminase	1.38953	0.474595	0.262678	1620.85	2252.22
BMEI0177	-	uroporphyrinogen-III synthase	1.16925	0.225581	0.0954803	1453.2	1699.15
BMEI0178	-	hypothetical protein BMEI0178	2.03163	1.02264	0.990393	1938.74	3938.8
BMEI0179	-	hypothetical protein BMEI0179	1.98084	0.986114	0.979999	2613.4	5176.73
BMEI0180	-	Hypothetical Cytosolic Protein	0.919703	-0.12076	0.0554019	3089.15	2841.1
BMEI0181	-	MACROLIDE-EFFLUX PROTEIN	0.874745	-0.193066	0.0782337	1128.84	987.447
BMEI0182	-	BIOTIN SYNTHESIS PROTEIN BIOC	1.01649	0.0236016	0.0454234	780.7	793.577
BMEI0183	-	COMPETENCE PROTEIN F	0.984965	-0.021856	0.0230364	564.797	556.305
BMEI0184	-	GLUTAREDOXIN	0.306878	-1.70426	1	16240.2	4983.76
BMEI0185	-	BETA-UREIDOPROPIONASE	0.480265	-1.0581	0.991526	6328.66	3039.43
BMEI0186	-	Hypothetical Cytosolic Protein	0.579402	-0.787364	0.760576	5923.05	3431.82
BMEI0187	-	TRANSPORTER, DME FAMILY	0.762279	-0.39161	0.1618	2671.43	2036.37
BMEI0188	-	3-demethylubiquinone-9 3-methyltransferase	1.22517	0.292981	0.107856	2025.58	2481.68
BMEI0189	-	aspartate kinase	0.985255	-0.0214306	0.066662	1259.98	1241.4
BMEI0190	-	PHOSPHOENOLPYRUVATE-PROTEIN PHOSPHOTRANSFERASE PTSP	1.23544	0.30503	0.105035	2293.94	2834.04
BMEI0191	prfA	peptide chain release factor 1	1.16121	0.215628	0.0891828	1122.66	1303.64
BMEI0192	-	METHYLTRANSFERASE	1.08454	0.117088	0.0635768	2336.48	2534.01
BMEI0193	-	hypothetical protein BMEI0193	1.67113	0.740827	0.229541	12791.9	21376.9
BMEI0194	-	Hypothetical Cytosolic Protein	1.24359	0.314515	0.010033	15337.1	19073.2
BMEI0195	-	ATP-DEPENDENT CLP PROTEASE, ATP-BINDING SUBUNIT CLPB	0.277751	-1.84814	1	13403.2	3722.74
BMEI0196	-	PROTEIN ERFK/SRFK	1.05975	0.0837263	0.0681622	1147	1215.54
BMEI0197	-	LYSOSTAPHIN	1.05814	0.0815273	0.0713806	1487.86	1574.36
BMEI0198	-	hypothetical protein BMEI0198	1.34585	0.428518	0.1028	4369.33	5880.46
BMEI0199	-	hypothetical protein BMEI0199	0.784874	-0.349467	0.140932	2332.37	1830.62
BMEI0200	-	TRANSPOSASE	1.1412	0.190555	0.0686618	2551.38	2911.64
BMEI0201	rplU	50S ribosomal protein L21	1.06837	0.0954072	0.00998528	10914	11660.1
BMEI0202	rpmA	50S ribosomal protein L27	0.916101	-0.126421	0.0372708	4667.17	4275.6
BMEI0203	-	ACETYLTRANSFERASE	1.08735	0.120821	0.0627427	922.413	1002.99
BMEI0204	-	ACETYLTRANSFERASE	1.00728	0.0104681	0.0452906	784.28	789.991
BMEI0205	-	IMMUNOGLOBULIN-BINDING PROTEIN EIBE	1.32547	0.4065	0.187538	1087.93	1442.01
BMEI0206	obgE	GTPase ObgE	1.06681	0.0933098	0.0589086	907.009	967.61
BMEI0207	-	gamma-glutamyl kinase	1.06423	0.0898092	0.0607228	943.568	1004.17
BMEI0208	proA	gamma-glutamyl phosphate reductase	1.21728	0.283656	0.114903	1258.92	1532.46
BMEI0209	nadD	nicotinic acid mononucleotide adenyltransferase	1.05646	0.0792358	0.0421897	712.291	752.506
BMEI0210	-	iojap protein family	0.598693	-0.740111	0.570044	7775.68	4655.25
BMEI0211	-	hypothetical protein BMEI0211	0.511567	-0.967005	0.963657	7149.15	3657.27
BMEI0212	-	hypothetical protein BMEI0212	0.82842	-0.271565	0.110667	1607.79	1331.92
BMEI0213	-	Membrane proteins related to metalloendopeptidase	1.19893	0.261744	0.107021	1431.92	1716.77
BMEI0214	-	TAIL-SPECIFIC PROTEASE	1.08802	0.121706	0.0144676	8697.45	9463.01
BMEI0215	-	dinucleoside polyphosphate hydrolase	1.10033	0.137942	0.0766231	1621.16	1783.81
BMEI0216	-	hypothetical protein BMEI0216	0.752562	-0.410117	0.167765	2967.91	2233.54
BMEI0217	-	hypothetical protein BMEI0217	0.767234	-0.382261	0.171714	1578.08	1210.76
BMEI0218	-	TRANSCRIPTIONAL REGULATORY PROTEIN, LYSR FAMILY	1.23394	0.303278	0.1083	917.811	1132.53
BMEI0219	-	MALONATE-SEMIALDEHYDE DEHYDROGENASE (ACYLATING) / METHYLMALONATE-SEMIALDEHYDE DEHYDROGENASE (ACYLATING)	1.20019	0.263265	0.0924571	2222.35	2667.24
BMEI0220	-	hypothetical protein BMEI0220	1.17166	0.228552	0.0924516	1114.41	1305.7
BMEI0221	-	pyridoxamine kinase	0.985002	-0.021802	0.0651742	1185.8	1168.02
BMEI0222	-	CARBONIC ANHYDRASE	0.798436	-0.324751	0.130812	2121.4	1693.8
BMEI0223	-	MEMBRANE-BOUND LYTIC MUREIN TRANSGLYCOSYLASE B	0.863026	-0.212525	0.0452887	4860.58	4194.81
BMEI0224	-	hypothetical protein BMEI0224	0.997214	-0.0040256	0.0671226	1297.05	1293.43
BMEI0225	-	SIGNAL RECOGNITION PARTICLE, SUBUNIT FFH/SRP54	0.958535	-0.061097	0.0652503	1151.59	1103.84
BMEI0226	-	chorismate mutase	0.961227	-0.0570511	0.0530945	894.874	860.177
BMEI0227	rpsP	30S ribosomal protein S16	0.566531	-0.819774	0.8973	2364.74	1339.7
BMEI0228	-	LemA PROTEIN	1.44556	0.531629	0.139475	5645.9	8161.49
BMEI0229	-	Hypothetical Membrane Spanning Protein	1.24419	0.315203	0.0947928	2786.5	3466.92
BMEI0230	-	hypothetical protein BMEI0230	1.04712	0.0664304	0.0605873	2318.77	2428.04
BMEI0231	-	NAD-SPECIFIC GLUTAMATE DEHYDROGENASE	0.91005	-0.135983	0.0443909	4053.56	3688.94
BMEI0232	-	TRANSPORTER	1.20165	0.265012	0.107843	1283.18	1541.93
BMEI0233	purH	bifunctional phosphoribosylaminoimidazolecarboxamide formyltransferase/IMP cyclohydrolase	1.16768	0.223646	0.0945394	1520.47	1775.42
BMEI0234	-	Hypothetical Cytosolic Protein	1.33671	0.418689	0.205029	1309.72	1750.72
BMEI0235	-	16S rRNA m(5)C 967 METHYLTRANSFERASE	0.816617	-0.292269	0.110251	1237.14	1010.27
BMEI0236	-	heat shock protein HtpX	0.262431	-1.92999	1	31134.1	8170.56
BMEI0237	-	Hypothetical Cytosolic Protein	0.481829	-1.05341	0.994659	2452.28	1181.58
BMEI0238	-	acetyl-CoA synthetase	1.07634	0.106132	0.0519853	2995.86	3224.56
BMEI0239	-	USG PROTEIN	3.1036	1.63394	1	1464.7	4545.86
BMEI0240	-	FUSARIC ACID RESISTANCE PROTEIN FUSB / FUSARIC ACID RESISTANCE PROTEIN FUSC	1.84274	0.881849	0.948167	1368.46	2521.71
BMEI0241	-	PHOSPHATE REGULON SENSOR PROTEIN PHOR	0.961002	-0.0573883	0.0440915	777.368	747.052
BMEI0242	leuS	leucyl-tRNA synthetase	1.02057	0.0293805	0.0685829	1550	1581.89
BMEI0243	-	hypothetical protein BMEI0243	0.928088	-0.107666	0.0415323	737.667	684.621
BMEI0244	-	putative translaldolase	0.431519	-1.2125	0.99868	11113.2	4795.54
BMEI0246	-	PRIMOSOMAL PROTEIN N'	0.993656	-0.00918098	0.0591526	1008.94	1002.54
BMEI0247	-	hypothetical protein BMEI0247	0.820309	-0.28576	0.0469369	6016.61	4935.48
BMEI0248	-	F0F1 ATP synthase subunit delta	0.87402	-0.194262	0.0347053	5780.28	5052.07
BMEI0249	-	F0F1 ATP synthase subunit alpha	0.720405	-0.47312	0.0941743	8060.4	5806.75
BMEI0250	-	F0F1 ATP synthase subunit gamma	0.764679	-0.387073	0.11594	4133.69	3160.95
BMEI0251	-	F0F1 ATP synthase subunit beta	0.662117	-0.594841	0.1256	13002.5	8609.18
BMEI0252	atpC	F0F1 ATP synthase subunit epsilon	0.771879	-0.373554	0.166458	1735.49	1339.59
BMEI0253	-	TRANSCRIPTIONAL REGULATOR, MARR FAMILY	0.393624	-1.34511	0.999896	10193.2	4012.29
BMEI0254	-	TRANSCRIPTIONAL REGULATOR, GNTR FAMILY	0.864952	-0.209308	0.0869205	2101.45	1817.65
BMEI0255	-	hypothetical protein BMEI0255	1.05975	0.0837276	0.0403782	691.121	732.417
BMEI0256	-	D-AMINO ACID DEHYDROGENASE SMALL SUBUNIT	1.02894	0.0411524	0.066945	1217.95	1253.2
BMEI0257	-	PROLINE RACEMASE	1.07759	0.107807	0.0721851	1226.9	1322.1
BMEI0258	-	HIGH-AFFINITY BRANCHED-CHAIN AMINO ACID TRANSPORT SYSTEM PERMEASE PROTEIN LIVH	0.602937	-0.729922	0.691021	4427.64	2669.58
BMEI0259	-	HIGH-AFFINITY BRANCHED-CHAIN AMINO ACID TRANSPORT SYSTEM PERMEASE PROTEIN LIVM	0.490359	-1.02809	0.989471	4957.98	2431.19
BMEI0260	-	HIGH-AFFINITY BRANCHED-CHAIN AMINO ACID TRANSPORT ATP-BINDING PROTEIN BRAF	0.680297	-0.555762	0.363474	3028.61	2060.35
BMEI0261	-	HIGH-AFFINITY BRANCHED-CHAIN AMINO ACID TRANSPORT ATP-BINDING PROTEIN BRAG	0.790356	-0.339426	0.135188	2314.74	1829.47
BMEI0262	-	hypothetical protein BMEI0262	0.880535	-0.183547	0.0801673	2156.49	1898.87
BMEI0263	-	LEUCINE-, ISOLEUCINE-, VALINE-, THREONINE-, AND ALANINE-BINDING PROTEIN PRECURSOR	0.810887	-0.302428	0.113292	2425.47	1966.78
BMEI0265	-	LEUCINE-, ISOLEUCINE-, VALINE-, THREONINE-, AND ALANINE-BINDING PROTEIN PRECURSOR	1.15391	0.206527	0.049993	654.83	755.612
BMEI0266	-	pyruvate carboxylase	0.711614	-0.490834	0.236525	3475.82	2473.44
BMEI0267	-	MEMBRANE PROTEIN MOSC	0.858118	-0.220753	0.092985	1864.35	1599.83
BMEI0268	-	D-BETA-HYDROXYBUTYRATE DEHYDROGENASE	1.24779	0.31938	0.06281	4300.99	5366.75
BMEI0269	ispG	4-hydroxy-3-methylbut-2-en-1-yl diphosphate synthase	0.639234	-0.645583	0.485632	4404.36	2815.42
BMEI0270	-	GERANYLTRANSTRANSFERASE	1.08024	0.111358	0.074201	1448.72	1564.97
BMEI0271	mtgA	monofunctional biosynthetic peptidoglycan transglycosylase	1.12836	0.174228	0.0808757	1162.19	1311.37
BMEI0272	rpmF	50S ribosomal protein L32	1.1079	0.147827	0.0367596	4454.26	4934.87
BMEI0273	-	GLCG PROTEIN	0.416583	-1.26332	0.999805	3658	1523.86
BMEI0274	-	acetyl-CoA acetyltransferase	0.670573	-0.576534	0.441597	2006.13	1345.25
BMEI0275	-	ATP-DEPENDENT DNA HELICASE	1.07586	0.105496	0.0611931	2421.27	2604.96
BMEI0277	-	HEAT SHOCK PROTEIN 15	1.31252	0.392337	0.161778	2050.46	2691.26
BMEI0278	-	FERREDOXIN II	0.38986	-1.35897	0.999963	2335.08	910.353
BMEI0279	-	TRANSCRIPTIONAL REGULATOR	1.89433	0.921685	0.634232	15623.6	29596.2
BMEI0280	rpoH2	RNA polymerase factor sigma-32	1.83157	0.873085	0.299593	25032.5	45848.9
BMEI0281	-	Hypothetical Cytosolic Protein	1.69203	0.758753	0.816306	1248.07	2111.78
BMEI0282	-	ZINC METALLOPROTEASE	0.730473	-0.453097	0.226434	1337.17	976.766
BMEI0285	tbpA	thiamin transporter substrate binding subunit	0.483709	-1.04779	0.992841	4403.97	2130.24
BMEI0286	-	putative nucleotide-binding protein	0.964402	-0.0522937	0.0429465	764.768	737.544
BMEI0287	-	hypothetical protein BMEI0287	1.0819	0.113567	0.0624837	2382.69	2577.83
BMEI0288	-	ABC TRANSPORTER ATP-BINDING PROTEIN UUP	1.21351	0.279187	0.109719	1115.34	1353.48
BMEI0290	-	Hypothetical Cytosolic Protein	1.02113	0.0301615	0.00862682	11797.9	12047.2
BMEI0291	-	hypothetical protein BMEI0291	1.16135	0.215798	0.0352242	5212.26	6053.23
BMEI0292	-	pyruvate kinase	0.867086	-0.205753	0.0886662	1902.19	1649.36
BMEI0295	-	phosphoribosylaminoimidazole carboxylase ATPase subunit	1.31291	0.392763	0.178688	1565.9	2055.88
BMEI0298	-	hypothetical protein BMEI0298	1.13637	0.184428	0.0435121	4091.94	4649.94
BMEI0299	-	hypothetical protein BMEI0299	0.676468	-0.563906	0.101959	12620.9	8537.61
BMEI0300	-	TRANSPORTER, MFS superfamily	0.930504	-0.103916	0.0496456	3381.15	3146.18
BMEI0301	-	hypothetical protein BMEI0301	0.82252	-0.281878	0.0853201	3312.54	2724.63
BMEI0302	-	QUINONE OXIDOREDUCTASE	0.693063	-0.528941	0.34616	2265.5	1570.13
BMEI0303	-	Hypothetical Cytosolic Protein	0.938458	-0.0916363	0.0305481	5214.15	4893.26
BMEI0304	-	Hypothetical Cytosolic Protein	1.17016	0.22671	0.0147837	405.871	474.935
BMEI0305	-	TRANSCRIPTIONAL REGULATOR, DEOR FAMILY	1.31033	0.389928	0.114784	668.97	876.57
BMEI0306	-	hypothetical protein BMEI0306	1.25331	0.325739	0.0776327	640.093	802.232
BMEI0309	pgk	phosphoglycerate kinase	0.908732	-0.138073	0.0525932	3421.71	3109.42
BMEI0310	-	glyceraldehyde-3-phosphate dehydrogenase	0.724069	-0.465802	0.0836507	8511.17	6162.67
BMEI0312	-	Hypothetical Cytosolic Protein	1.28523	0.362028	0.0755608	4293.88	5518.62
BMEI0313	-	Hypothetical Cytosolic Protein	1.22558	0.293464	0.0517002	4663.74	5715.79
BMEI0314	-	hypothetical protein BMEI0314	0.876431	-0.190288	0.0816275	1229.19	1077.3
BMEI0315	-	5-FORMYLTETRAHYDROFOLATE CYCLO-LIGASE	1.01044	0.014981	0.0496211	838.21	846.96
BMEI0316	-	hypothetical protein BMEI0316	1.16109	0.215474	0.0763454	881.058	1022.98
BMEI0317	-	INTEGRAL MEMBRANE PROTEIN	0.436765	-1.19507	0.999369	3722.13	1625.7
BMEI0318	-	2Fe-2S ferredoxins, iron-sulfur binding protein	0.481212	-1.05525	0.994725	2970.97	1429.67
BMEI0319	-	BIOY PROTEIN	0.196484	-2.34752	1	18970.3	3727.35
BMEI0320	-	TRANSCRIPTIONAL REGULATOR, GNTR FAMILY	0.665909	-0.586603	0.454931	2360.21	1571.68
BMEI0321	-	hypothetical protein BMEI0321	1.00598	0.00860649	0.0433996	3463.52	3484.24
BMEI0322	rpmE	50S ribosomal protein L31	1.38989	0.474967	0.0744404	7018.11	9754.37
BMEI0323	-	PROBABLE TRANSPORT ATP-BINDING PROTEIN MSBA	0.590201	-0.760722	0.80928	2873.32	1695.83
BMEI0324	-	hypothetical protein BMEI0324	0.952831	-0.0697071	0.033431	4694.5	4473.07
BMEI0325	-	MotA/TolQ/ExbB proton channel family	0.736081	-0.442063	0.0822288	7627.05	5614.13
BMEI0326	-	MYO-INOSITOL-1(OR 4)-MONOPHOSPHATASE	1.15074	0.202563	0.0788298	2158.73	2484.14
BMEI0327	-	elongation factor P	0.721184	-0.471561	0.166622	4726.46	3408.65
BMEI0328	-	TETRATRICOPEPTIDE REPEAT FAMILY PROTEIN	0.701036	-0.51244	0.316969	1530.85	1073.18
BMEI0329	-	thiamine-phosphate pyrophosphorylase	0.773161	-0.371159	0.147581	1208.1	934.058
BMEI0330	-	OPGC	0.77109	-0.375028	0.143844	2855.29	2201.69
BMEI0331	-	hypothetical protein BMEI0331	2.11527	1.08084	0.995948	1873.81	3963.62
BMEI0332	ruvC	Holliday junction resolvase	1.54596	0.628501	0.525776	919.257	1421.13
BMEI0333	ruvA	Holliday junction DNA helicase motor protein	1.49514	0.58028	0.385485	2370.39	3544.07
BMEI0334	ruvB	Holliday junction DNA helicase B	1.07513	0.104508	0.0526184	804.784	865.245
BMEI0335	-	4-hydroxybenzoyl-CoA thioesterase family active site	1.06441	0.0900479	0.0719978	1517.38	1615.11
BMEI0336	-	TOLQ PROTEIN	1.54776	0.630179	0.269363	5533.27	8564.16
BMEI0337	-	BIOPOLYMER TRANSPORT EXBD PROTEIN	1.27698	0.352734	0.0512168	5713.4	7295.89
BMEI0338	-	hypothetical protein BMEI0338	1.20846	0.273169	0.111069	1297.4	1567.85
BMEI0339	tolB	translocation protein TolB	0.951206	-0.0721708	0.0382366	4176.72	3972.92
BMEI0340	-	PEPTIDOGLYCAN-ASSOCIATED LIPOPROTEIN	0.608253	-0.717256	0.181197	21804.3	13262.5
BMEI0341	-	TPR repeat containing exported protein	0.862522	-0.213367	0.0917912	1770.76	1527.32
BMEI0342	-	CELL CYCLE PROTEIN MESJ	0.880037	-0.184363	0.0643186	926.824	815.64
BMEI0343	-	CELL DIVISION PROTEIN FTSH	0.505327	-0.984712	0.869344	22582.7	11411.6
BMEI0344	-	PHOSPHOGLUCOSAMINE MUTASE / PHOSPHOACETYLGLUCOSAMINE MUTASE / PHOSPHOMANNOMUTASE	1.21116	0.276395	0.0447695	4992.29	6046.49
BMEI0346	-	SODIUM/BILE ACID COTRANSPORTER HOMOLOG, SBF FAMILY	0.898968	-0.153658	0.0612408	2980.42	2679.3
BMEI0347	-	phosphoserine aminotransferase	0.443581	-1.17273	0.999041	4108.52	1822.46
BMEI0349	-	D-3-PHOSPHOGLYCERATE DEHYDROGENASE	0.495438	-1.01322	0.990433	2834.36	1404.25
BMEI0350	-	ACETYLTRANSFERASE	0.753854	-0.407644	0.149789	1018.66	767.922
BMEI0351	-	adenylosuccinate synthetase	0.901149	-0.150162	0.0689647	1066.66	961.218
BMEI0352	-	hypothetical transcription regulator	1.08776	0.121364	0.0667851	996.848	1084.33
BMEI0353	-	PROLINE/BETAINE TRANSPORTER	0.988032	-0.0173705	0.0624146	2149.12	2123.4
BMEI0354	-	Hypothetical Membrane Spanning Protein	0.909984	-0.136086	0.0642363	1005.72	915.188
BMEI0355	-	Glutamine amidotransferase class-II	1.79176	0.841377	0.886655	694.605	1244.56
BMEI0356	-	Type 1 capsular polysaccharide biosynthesis protein J	8.94813	3.16159	1	890.76	7970.63
BMEI0357	-	TRANSCRIPTIONAL REGULATORY PROTEIN, ASNC FAMILY	0.904582	-0.144676	0.0685559	1071.25	969.032
BMEI0358	dut	deoxyuridine 5'-triphosphate nucleotidohydrolase	0.819416	-0.287332	0.0385299	7068.41	5791.96
BMEI0359	-	periplasmic component of efflux system	0.604218	-0.726859	0.738256	1478.61	893.405
BMEI0361	-	ABC TRANSPORTER ATP-BINDING PROTEIN / ABC TRANSPORTER PERMEASE PROTEIN	1.12821	0.174035	0.0540556	730.063	823.663
BMEI0362	-	hypothetical protein BMEI0362	1.09338	0.128795	0.0535887	786.261	859.682
BMEI0363	-	TONB PROTEIN	1.1114	0.152382	0.0701077	976.156	1084.9
BMEI0364	-	BIOPOLYMER TRANSPORT EXBD PROTEIN	1.21228	0.277724	0.0975514	912.801	1106.57
BMEI0365	-	BIOPOLYMER TRANSPORT EXBB PROTEIN	1.01945	0.0277922	0.0674415	1281.26	1306.18
BMEI0366	-	hypothetical protein BMEI0366	3.21496	1.6848	1	4411.62	14183.2
BMEI0367	-	hypothetical protein BMEI0367	3.80232	1.92688	1	2483.41	9442.71
BMEI0368	-	hypothetical protein BMEI0368	1.20796	0.272572	0.001062	52304.3	63181.4
BMEI0369	-	hypothetical protein BMEI0369	3.12109	1.64205	0.999998	13707.3	42781.6
BMEI0370	-	SENSORY TRANSDUCTION HISTIDINE KINASE	2.40245	1.26451	0.99981	1040.87	2500.63
BMEI0371	-	RNA polymerase sigma factor	3.72796	1.89839	1	9050.93	33741.6
BMEI0372	-	two-component response regulator	2.03038	1.02175	0.760151	24303.5	49345.3
BMEI0373	-	hypothetical protein BMEI0373	1.92676	0.946173	0.59784	20702	39887.8
BMEI0374	-	SENSORY TRANSDUCTION HISTIDINE KINASE	3.00039	1.58515	0.999999	5006.66	15021.9
BMEI0375	-	FERRIC UPTAKE REGULATION PROTEIN	1.57496	0.655312	0.36347	4718.86	7432
BMEI0376	-	hypothetical protein BMEI0376	1.32519	0.406201	0.190124	1150.06	1524.05
BMEI0377	-	RIBOSOMAL LARGE SUBUNIT PSEUDOURIDINE SYNTHASE D	1.41425	0.500036	0.296076	1665.66	2355.65
BMEI0378	-	RNA polymerase factor sigma-32	1.70823	0.772503	0.508797	7105.58	12138
BMEI0379	-	PHOSPHINOTHRICIN N-ACETYLTRANSFERASE	1.24973	0.321612	0.112202	871.32	1088.91
BMEI0380	-	malate synthase G	0.773886	-0.369808	0.142747	1160.24	897.892
BMEI0381	-	glutamyl-Q tRNA(Asp) synthetase	1.16621	0.221829	0.0590778	701.869	818.528
BMEI0382	-	DNA-3-METHYLADENINE GLYCOSIDASE	0.994635	-0.00776127	0.0323495	650.522	647.032
BMEI0383	-	5-METHYLCYTOSINE-SPECIFIC RESTRICTION ENZYME A	0.667907	-0.582281	0.223942	7362.03	4917.15
BMEI0384	-	DISULFIDE BOND FORMATION PROTEIN B	0.785057	-0.34913	0.142909	2236.22	1755.56
BMEI0385	-	Putative membrane-associated alkaline phosphatase	0.800646	-0.320763	0.120882	2484.63	1989.31
BMEI0386	-	SUCCINATE-SEMIALDEHYDE DEHYDROGENASE (NADP+)	2.30122	1.2024	0.999316	2253.11	5184.89
BMEI0387	-	TRANSCRIPTIONAL REGULATOR, ICLR FAMILY	1.26613	0.340422	0.141855	1582.11	2003.15
BMEI0388	-	CHOLINE DEHYDROGENASE	1.17278	0.229927	0.0896618	1033.71	1212.31
BMEI0390	-	Hypothetical Cytosolic Protein	0.400757	-1.3192	0.999903	1773.58	710.776
BMEI0391	-	SUGAR TRANSPORT ATP-BINDING PROTEIN	1.2698	0.344597	0.0811063	622.982	791.061
BMEI0392	-	RIBOSE TRANSPORT SYSTEM PERMEASE PROTEIN RBSC	1.346	0.428679	0.205389	1036.13	1394.64
BMEI0393	-	D-RIBOSE-BINDING PERIPLASMIC PROTEIN PRECURSOR	1.20633	0.27062	0.109496	1245.44	1502.41
BMEI0394	-	2-DEOXY-D-GLUCONATE 3-DEHYDROGENASE	0.97095	-0.0425314	0.0668208	1877.65	1823.1
BMEI0395	-	2-DEOXY-D-GLUCONATE 3-DEHYDROGENASE	0.938775	-0.091149	0.0325636	654.597	614.519
BMEI0396	-	DIHYDROXYACETONE KINASE	0.892848	-0.163514	0.0692766	1041.15	929.592
BMEI0397	-	DIHYDROXYACETONE KINASE	0.80022	-0.321532	0.125162	1286.13	1029.19
BMEI0398	-	DEOXYRIBONUCLEOSIDE REGULATOR / DIHYDROXYACETONE KINASE	1.06977	0.0972946	0.0566278	866.599	927.058
BMEI0399	-	DIHYDROXYACETONE KINASE	1.03632	0.0514633	0.0652926	1124.85	1165.7
BMEI0400	-	hypothetical protein BMEI0400	0.676684	-0.563446	0.332295	3924.03	2655.33
BMEI0401	-	hypothetical protein BMEI0401	0.900766	-0.150776	0.0715198	1121.49	1010.2
BMEI0402	-	31 KDA OUTER-MEMBRANE IMMUNOGENIC PROTEIN PRECURSOR	1.006	0.0086255	0.0382438	705.922	710.155
BMEI0403	-	MULTIPLE ANTIBIOTIC RESISTANCE PROTEIN MARC	1.88987	0.918284	0.963126	1822.48	3444.23
BMEI0404	-	hypothetical protein BMEI0404	1.24588	0.317161	0.13122	1357.81	1691.67
BMEI0405	-	7-ALPHA-HYDROXYSTEROID DEHYDROGENASE	1.55524	0.637137	0.537413	1972.63	3067.92
BMEI0406	-	7-alpha-hydroxysteroid dehydrogenase	1.50232	0.58719	0.341842	3094.67	4649.19
BMEI0407	-	hypothetical protein BMEI0407	0.914894	-0.128324	0.0737904	1289.37	1179.64
BMEI0408	-	hypothetical protein BMEI0408	0.969741	-0.0443292	0.0592488	2431.22	2357.66
BMEI0409	-	isocitrate lyase	0.890011	-0.168106	0.0803248	1918.8	1707.75
BMEI0410	-	TRANSCRIPTIONAL REGULATOR, MERR FAMILY	2.05082	1.0362	0.992712	953.741	1955.95
BMEI0411	-	PUTRESCINE-BINDING PERIPLASMIC PROTEIN	0.686099	-0.543511	0.313203	3581.51	2457.27
BMEI0412	-	PUTRESCINE TRANSPORT ATP-BINDING PROTEIN POTG	1.00641	0.00921698	0.0452279	783.951	788.976
BMEI0413	-	PUTRESCINE TRANSPORT SYSTEM PERMEASE PROTEIN POTH	1.10603	0.145387	0.0755741	1799.02	1989.77
BMEI0414	-	PUTRESCINE TRANSPORT SYSTEM PERMEASE PROTEIN POTI	1.06107	0.0855242	0.0656472	1060.3	1125.05
BMEI0415	-	hypothetical protein BMEI0415	0.938255	-0.0919476	0.0706371	1311.77	1230.77
BMEI0416	-	hypothetical protein BMEI0416	1.0051	0.00734074	0.0554711	931.637	936.39
BMEI0417	-	NON-MOTILE AND PHAGE-RESISTANCE PROTEIN	0.752747	-0.409764	0.188473	2291.85	1725.18
BMEI0418	-	LIPOOLIGOSACCHARIDE BIOSYNTHESIS PROTEIN LIC2B	1.0998	0.137237	0.0549457	790.203	869.063
BMEI0419	-	hypothetical protein BMEI0419	1.05547	0.0778828	0.0707097	1339.12	1413.4
BMEI0420	-	OXIDOREDUCTASE	0.939395	-0.0901961	0.0719123	1642.39	1542.85
BMEI0421	-	PLEIOTROPIC REGULATORY PROTEIN	0.752149	-0.41091	0.104788	5247.4	3946.83
BMEI0422	-	hypothetical protein BMEI0422	1.27325	0.348512	0.0301621	8274.9	10536
BMEI0423	-	RESPONSE REGULATOR CTRA	2.02617	1.01875	0.956308	7167.84	14523.2
BMEI0424	-	hypothetical protein BMEI0424	1.17163	0.228516	0.091924	1803.61	2113.17
BMEI0425	-	hypothetical protein BMEI0425	1.42272	0.508654	0.0297892	15055.6	21419.9
BMEI0426	-	ACETYLTRANSFERASE	1.16702	0.22283	0.0588007	3362.33	3923.91
BMEI0427	-	hypothetical protein BMEI0427	2.25775	1.17488	0.996931	5676.17	12815.4
BMEI0428	trmU	tRNA (5-methylaminomethyl-2-thiouridylate)-methyltransferase	0.809347	-0.305169	0.111062	1162.2	940.623
BMEI0429	-	23S ribosomal RNA methyltransferase	1.05642	0.0791887	0.0189791	502.06	530.388
BMEI0430	-	NODULATION PROTEIN NOLR	0.818032	-0.28977	0.109025	2362.97	1932.98
BMEI0431	-	hypothetical protein BMEI0431	0.917037	-0.124948	0.0470255	787.172	721.866
BMEI0432	-	hypothetical protein BMEI0432	1.07882	0.109461	0.0402732	671.527	724.46
BMEI0434	-	PERIPLASMIC DIPEPTIDE TRANSPORT PROTEIN PRECURSOR	0.697232	-0.52029	0.303525	1257.11	876.5
BMEI0435	-	DIPEPTIDE TRANSPORT SYSTEM PERMEASE PROTEIN DPPB	0.908386	-0.138623	0.030043	622.419	565.397
BMEI0436	-	DIPEPTIDE TRANSPORT SYSTEM PERMEASE PROTEIN DPPC	1.21052	0.275632	0.101616	978.659	1184.69
BMEI0437	-	DIPEPTIDE TRANSPORT ATP-BINDING PROTEIN DPPD	1.07837	0.108859	0.0323063	602.059	649.245
BMEI0438	-	DIPEPTIDE TRANSPORT ATP-BINDING PROTEIN DPPF	1.14989	0.201502	0.0567113	713.832	820.831
BMEI0439	-	GLYCINE BETAINE/L-PROLINE TRANSPORT ATP-BINDING PROTEIN PROV	0.972421	-0.0403476	0.0649755	1165.8	1133.64
BMEI0440	-	GLYCINE BETAINE/L-PROLINE TRANSPORT SYSTEM PERMEASE PROTEIN PROW	0.515222	-0.956733	0.955564	7542.5	3886.06
BMEI0441	-	GLYCINE BETAINE/L-PROLINE-BINDING PROTEIN PROX	0.7075	-0.499197	0.148033	6353.84	4495.34
BMEI0442	-	hypothetical protein BMEI0442	1.0141	0.0201993	0.0158435	489.285	496.184
BMEI0443	-	hypothetical protein BMEI0443	0.343585	-1.54126	0.999999	3046.37	1046.69
BMEI0444	-	METHYLTRANSFERASE	0.716912	-0.480132	0.26731	1463.39	1049.12
BMEI0445	-	OXALATE/FORMATE ANTIPORTER	1.2431	0.313938	0.105613	2395.78	2978.19
BMEI0446	-	TRANSCRIPTIONAL REGULATOR, MARR FAMILY	0.958152	-0.0616736	0.00566271	16092.6	15419.1
BMEI0447	-	LEUCINE-RESPONSIVE REGULATORY PROTEIN	1.45251	0.538552	0.319196	2261.51	3284.88
BMEI0448	-	hypothetical protein BMEI0448	1.46268	0.548617	0.386389	1409.48	2061.63
BMEI0449	-	ANTHRANILATE SYNTHASE	1.52237	0.606316	0.503428	1213.25	1847.01
BMEI0450	-	COBALT-ZINC-CADMIUM RESISTANCE PROTEIN CZCD	1.26411	0.338123	0.130237	1969.78	2490.02
BMEI0451	-	2-isopropylmalate synthase	1.50396	0.588762	0.303246	3680.99	5536.05
BMEI0452	-	putative phosphohydrolase, Icc family	1.11553	0.157723	0.0587389	801.81	894.439
BMEI0453	-	MUTT/NUDIX FAMILY PROTEIN	2.09047	1.06383	0.991076	3442.31	7196.05
BMEI0454	-	OUTER MEMBRANE PROTEIN W PRECURSOR	0.121707	-3.03851	1	18238.3	2219.74
BMEI0455	-	GLUTATHIONE S-TRANSFERASE	0.78159	-0.355516	0.141682	1259.13	984.12
BMEI0456	-	ACETYLTRANSFERASE	1.36619	0.450158	0.233719	1112.09	1519.33
BMEI0457	-	Hypothetical Membrane Associated Protein	1.03325	0.0471871	0.0693223	1459.98	1508.52
BMEI0458	-	Hypothetical Membrane Spanning Protein	0.8577	-0.221455	0.0890763	1253.09	1074.77
BMEI0459	-	hypothetical protein BMEI0459	0.841313	-0.249285	0.0973731	1278.43	1075.56
BMEI0460	-	MOXR PROTEIN	0.745753	-0.42323	0.209373	1855.74	1383.92
BMEI0461	-	hypothetical protein BMEI0461	0.559434	-0.837961	0.91191	2852.82	1595.96
BMEI0462	-	PHOSPHOHYDROLASE (MUTT/NUDIX FAMILY PROTEIN)	0.705339	-0.503611	0.309934	2015.79	1421.82
BMEI0463	-	POLY(A) POLYMERASE / TRNA NUCLEOTIDYLTRANSFERASE	0.733498	-0.447135	0.213795	1264.61	927.588
BMEI0464	-	lipid A-myristate beta-hydroxylase	0.683473	-0.549044	0.206511	6360.72	4347.38
BMEI0465	-	ASPARTYL/ASPARAGINYL BETA-HYDROXYLASE	0.829393	-0.269873	0.105125	1313.15	1089.12
BMEI0466	-	ACETYLTRANSFERASE	1.0346	0.0490694	0.0645349	1103.77	1141.96
BMEI0467	-	coproporphyrinogen III oxidase	1.0698	0.0973408	0.0671079	2022.65	2163.83
BMEI0468	-	Hypothetical Cytosolic Protein	1.63054	0.705349	0.660791	2354.76	3839.53
BMEI0469	-	PURINE NUCLEOSIDE PERMEASE	1.79394	0.843128	0.835046	3962.52	7108.51
BMEI0470	-	ribosomal RNA methyltransferase	0.737568	-0.439152	0.223271	1567.42	1156.08
BMEI0471	-	ABC TRANSPORTER ATP-BINDING PROTEIN	0.963086	-0.0542634	0.0696157	1482.85	1428.11
BMEI0472	-	ABC TRANSPORTER ATP-BINDING PROTEIN	1.17101	0.227758	0.0954086	1259.66	1475.08
BMEI0473	-	UBIQUINOL-CYTOCHROME C REDUCTASE IRON-SULFUR SUBUNIT	0.372954	-1.42293	0.99995	18343.7	6841.37
BMEI0474	-	CYTOCHROME B	0.329136	-1.60324	0.999999	10287.2	3385.89
BMEI0475	-	CYTOCHROME C1	0.573427	-0.802317	0.874904	2632.04	1509.29
BMEI0476	-	adenine phosphoribosyltransferase	1.07903	0.109732	0.0177356	479.926	517.854
BMEI0477	-	MONOAMINE OXIDASE REGULATORY PROTEIN, PUTATIVE	1.23926	0.309473	0.125435	1578.35	1955.97
BMEI0478	-	(R)-specific enoyl-CoA hydratase	1.12752	0.17315	0.0803142	1147.96	1294.35
BMEI0479	-	translation-associated GTPase	0.979436	-0.0299771	0.068704	1493.82	1463.1
BMEI0480	-	peptidyl-tRNA hydrolase	1.09963	0.137019	0.0767546	1590.24	1748.68
BMEI0481	-	50S ribosomal protein L25/general stress protein Ctc	0.887503	-0.172176	0.00840093	14736.6	13078.8
BMEI0482	-	Hypothetical ATP-binding protein	1.11447	0.156358	0.0489653	706.134	786.965
BMEI0483	-	ribose-phosphate pyrophosphokinase	0.699224	-0.516174	0.317077	2486.15	1738.37
BMEI0484	-	hypothetical protein BMEI0484	1.07245	0.100905	0.0482268	3235.09	3469.46
BMEI0485	-	XAA-PRO DIPEPTIDASE	1.32861	0.409916	0.187201	1764.57	2344.43
BMEI0486	-	Hypothetical Cytosolic Protein	1.62893	0.703928	0.715403	1350.89	2200.52
BMEI0487	-	ATP synthase beta subunit/transription termination factor rho	1.14398	0.194058	0.0469712	646.968	740.117
BMEI0488	-	prolipoprotein diacylglyceryl transferase	1.2276	0.295837	0.119434	1559.6	1914.56
BMEI0489	-	hypothetical protein BMEI0489	0.309062	-1.69403	1	4849.25	1498.72
BMEI0490	-	Hypothetical Cytosolic Protein	1.39785	0.483214	0.215661	735.578	1028.23
BMEI0491	-	PROTEIN SECRETION CHAPERONIN CSAA	1.66857	0.738608	0.780671	1148.11	1915.69
BMEI0492	-	OSMOLARITY SENSOR PROTEIN ENVZ	0.969969	-0.043989	0.059149	1005.46	975.267
BMEI0493	-	TRANSCRIPTIONAL REGULATORY PROTEIN OMPR	1.23171	0.300659	0.116065	1831.29	2255.61
BMEI0494	-	TRANSCRIPTIONAL REGULATORY PROTEIN PETP	1.0714	0.0994941	0.0722839	1300.66	1393.52
BMEI0495	-	hypothetical protein BMEI0495	1.50713	0.591803	0.155159	7184.83	10828.5
BMEI0496	-	HYDROXYACYLGLUTATHIONE HYDROLASE	0.431876	-1.21131	0.998441	12383.2	5348.01
BMEI0497	-	Hypothetical Membrane Spanning Protein	1.15707	0.210478	0.0109603	11678.5	13512.9
BMEI0498	-	COLD SHOCK PROTEIN CSPA	2.03487	1.02493	0.991341	1701.01	3461.32
BMEI0499	-	SOLUBLE LYTIC MUREIN TRANSGLYCOSYLASE	0.986432	-0.0197087	0.038211	711.707	702.05
BMEI0500	-	SOLUBLE LYTIC MUREIN TRANSGLYCOSYLASE	0.958794	-0.0607079	0.0675239	1245.13	1193.82
BMEI0501	-	excinuclease ABC subunit B	0.52281	-0.935642	0.973303	2492.87	1303.3
BMEI0502	-	Hypothetical Membrane Spanning Protein	1.60728	0.684621	0.669783	1534.8	2466.85
BMEI0503	-	ACYL-COA HYDROLASE	1.19159	0.252886	0.0414086	4991.89	5948.27
BMEI0504	-	EXTENSIN-LIKE PROTEIN	0.735582	-0.443043	0.0738468	8339.54	6134.41
BMEI0505	-	Hypothetical Membrane Associated Protein	1.01919	0.0274226	0.0678063	1680.89	1713.15
BMEI0506	-	TRANSPORTER, DME FAMILY	1.34453	0.427103	0.208866	1118.23	1503.49
BMEI0507	-	hypothetical protein BMEI0507	0.921077	-0.118606	0.0563093	3012.45	2774.7
BMEI0508	greA	transcription elongation factor GreA	1.05862	0.082188	0.00699398	13607.8	14405.6
BMEI0509	-	LIPOPOLYSACCHARIDE CORE BIOSYNTHESIS MANNOSYLTRANSFERASE LPCC	1.24238	0.31311	0.128291	1244.59	1546.25
BMEI0510	-	LEUCINE-RESPONSIVE REGULATORY PROTEIN	0.927696	-0.108276	0.0737347	1632.77	1514.71
BMEI0511	-	TRK SYSTEM POTASSIUM UPTAKE PROTEIN TRKH	0.959842	-0.0591315	0.0628275	1082	1038.55
BMEI0512	-	THIOREDOXIN REDUCTASE	0.534856	-0.902779	0.898278	8475.1	4532.96
BMEI0513	-	TRANSCRIPTIONAL REGULATORY PROTEIN, LYSR FAMILY	0.73289	-0.448332	0.236668	1821.42	1334.9
BMEI0514	-	hypothetical protein BMEI0514	1.1632	0.218093	0.0184102	435.776	506.892
BMEI0515	-	hypothetical protein BMEI0515	0.951451	-0.0717989	0.05233	878.593	835.938
BMEI0516	-	aspartate aminotransferase	0.740364	-0.433694	0.106746	5847.29	4329.12
BMEI0517	-	GLUTATHIONE S-TRANSFERASE	0.868176	-0.203941	0.0886226	1411.75	1225.65
BMEI0518	-	COLD SHOCK PROTEIN CSPA	2.89393	1.53303	0.999982	14522.6	42027.3
BMEI0519	-	PHOSPHOHYDROLASE (MUTT/NUDIX FAMILY PROTEIN)	1.04932	0.0694565	0.0677328	1844.79	1935.77
BMEI0520	-	ABC TRANSPORTER ATP-BINDING PROTEIN	0.912336	-0.132362	0.0765008	1470.77	1341.83
BMEI0521	-	hypothetical protein BMEI0521	1.12742	0.173027	0.0301223	543.573	612.836
BMEI0522	carB	carbamoyl phosphate synthase large subunit	1.00573	0.00824125	0.0683153	1467.37	1475.78
BMEI0523	-	hypothetical protein BMEI0523	0.858909	-0.219423	0.0889649	2139.98	1838.05
BMEI0524	-	hypothetical protein BMEI0524	0.991006	-0.0130345	0.0492712	841.819	834.248
BMEI0525	-	ZINC PROTEASE	0.815518	-0.294212	0.119811	1581.63	1289.85
BMEI0526	-	carbamoyl phosphate synthase small subunit	0.755733	-0.404052	0.123599	4264.14	3222.55
BMEI0527	-	Hypothetical Cytosolic Protein	0.645534	-0.631435	0.464946	4164.53	2688.35
BMEI0528	-	SODIUM-DEPENDENT PHOSPHATE TRANSPORT PROTEIN	0.743351	-0.427885	0.121292	5011.46	3725.27
BMEI0529	-	SODIUM-DEPENDENT PHOSPHATE TRANSPORT PROTEIN	0.548652	-0.866037	0.845452	8433.6	4627.11
BMEI0530	dnaG	DNA primase	0.809338	-0.305186	0.106149	1094.3	885.659
BMEI0531	-	hypothetical protein BMEI0531	0.337573	-1.56673	0.999998	14148	4775.98
BMEI0532	-	RNA polymerase sigma factor RpoD	0.468756	-1.09309	0.995849	5286.33	2477.99
BMEI0533	-	Hypothetical Cytosolic Protein	0.46639	-1.10039	0.997269	2217.56	1034.25
BMEI0534	-	hypothetical protein BMEI0534	0.77867	-0.360916	0.157428	1747.64	1360.84
BMEI0535	-	hypothetical protein BMEI0535	0.680989	-0.554297	0.322185	3788.37	2579.84
BMEI0536	-	PERIPLASMIC IMMUNOGENIC PROTEIN	0.974774	-0.03686	0.00319266	22348.6	21784.8
BMEI0537	-	INTEGRASE/RECOMBINASE	0.990534	-0.0137211	0.0553796	935.984	927.124
BMEI0538	-	hypothetical protein BMEI0538	1.04431	0.0625498	0.0383954	684.595	714.929
BMEI0539	-	hypothetical protein BMEI0539	0.721073	-0.471783	0.251923	1389.54	1001.96
BMEI0540	-	hypothetical protein BMEI0540	0.871381	-0.198624	0.0393679	674.949	588.138
BMEI0541	-	hypothetical protein BMEI0541	0.834	-0.26188	0.0193505	502.156	418.798
BMEI0542	-	hypothetical protein BMEI0542	1.20233	0.265831	0.0742535	3010.84	3620.02
BMEI0543	-	CHOLOYLGLYCINE HYDROLASE	0.647002	-0.628158	0.0707277	23678.5	15320.1
BMEI0544	-	hypothetical protein BMEI0544	0.414594	-1.27023	0.999785	1810.99	750.825
BMEI0545	-	INTEGRAL MEMBRANE PROTEIN	0.281455	-1.82902	1	15479.6	4356.81
BMEI0546	-	PYRAZINAMIDASE / NICOTINAMIDASE	0.719032	-0.475871	0.269816	1684.5	1211.21
BMEI0547	-	PHNA PROTEIN	1.26252	0.336312	0.14121	1261.09	1592.16
BMEI0548	-	FLAVOHEMOPROTEIN	1.05601	0.0786196	0.03672	659.325	696.252
BMEI0549	-	BENZOATE 1,2-DIOXYGENASE ALPHA SUBUNIT	1.13561	0.18347	0.0730634	932.209	1058.63
BMEI0550	-	hypothetical protein BMEI0550	0.828593	-0.271265	0.103303	2276.31	1886.14
BMEI0551	-	hypothetical protein BMEI0551	1.09178	0.12668	0.036102	622.248	679.357
BMEI0552	-	LYSOPHOSPHOLIPASE L2	0.927787	-0.108135	0.0731117	1393.7	1293.06
BMEI0553	-	putative ABC transporter ATP-binding protein	0.948149	-0.0768144	0.0637734	2267.01	2149.46
BMEI0554	-	TRANS-ACONITATE METHYLTRANSFERASE	1.06926	0.0966089	0.0489373	770.142	823.48
BMEI0555	-	hypothetical protein BMEI0555	0.892705	-0.163744	0.0456253	749.576	669.151
BMEI0556	-	ALPHA-KETOGLUTARATE PERMEASE	1.04053	0.0573136	0.0681834	1750.34	1821.28
BMEI0557	-	hypothetical protein BMEI0557	0.679026	-0.558462	0.393603	2475.02	1680.6
BMEI0558	-	TRANSCRIPTIONAL REGULATOR, ARSR FAMILY	0.895115	-0.159855	0.0123693	11223.4	10046.2
BMEI0559	-	5,10-METHYLENETETRAHYDROFOLATE REDUCTASE	0.953943	-0.0680247	0.0692928	1332.07	1270.72
BMEI0560	-	TRANSPORTER	0.982654	-0.025245	0.0567696	961.918	945.232
BMEI0561	-	MEMBRANE-BOUND LYTIC MUREIN TRANSGLYCOSYLASE B	0.980277	-0.0287393	0.0638131	1132.36	1110.03
BMEI0562	-	LYSOZYME M1 PRECURSOR	1.10042	0.138056	0.0474343	712.238	783.762
BMEI0563	-	hypothetical protein BMEI0563	2.56893	1.36117	0.999967	1186.97	3049.25
BMEI0564	-	DNAJ-LIKE PROTEIN DJLA	1.14638	0.197091	0.0763286	939.552	1077.09
BMEI0565	-	ANHYDRO-N-ACETYLMURAMYL-TRIPEPTIDE AMIDASE	1.20214	0.265607	0.10501	1710.01	2055.67
BMEI0566	-	SOLUBLE LYTIC MUREIN TRANSGLYCOSYLASE	0.583732	-0.776622	0.612051	9346.67	5455.95
BMEI0567	-	hypothetical protein BMEI0567	1.26541	0.339602	0.130701	966.857	1223.47
BMEI0569	-	manganese transport protein MntH	0.779495	-0.359389	0.00322731	43493.5	33903
BMEI0570	-	hypothetical protein BMEI0570	2.15379	1.10688	0.997522	1505.91	3243.4
BMEI0571	mraW	S-adenosyl-methyltransferase MraW	1.80159	0.849269	0.906436	2246.76	4047.73
BMEI0572	-	hypothetical protein BMEI0572	1.2126	0.278106	0.0471762	4806.42	5828.28
BMEI0573	-	PENICILLIN-BINDING PROTEIN 2	1.14644	0.197164	0.0619424	2957.73	3390.87
BMEI0574	murE	UDP-N-acetylmuramoylalanyl-D-glutamate--2,6-diaminopimelate ligase	1.22306	0.290492	0.082548	2941.2	3597.26
BMEI0575	-	UDP-N-ACETYLMURAMOYLALANYL-D-GLUTAMYL-2,6-DIAMINOPIMELATE--D-ALANYL-D- ALANYL LIGASE	1.18252	0.241868	0.0266309	6806.6	8048.96
BMEI0576	mraY	phospho-N-acetylmuramoyl-pentapeptide-transferase	1.09106	0.125725	0.0213078	6653.12	7258.93
BMEI0577	murD	UDP-N-acetylmuramoyl-L-alanyl-D-glutamate synthetase	1.17109	0.227848	0.0797275	2366.27	2771.1
BMEI0578	-	CELL DIVISION PROTEIN FTSW	1.23144	0.30035	0.0554876	4489.75	5528.87
BMEI0579	murG	N-acetylglucosaminyl transferase	1.02276	0.0324731	0.0671925	1762.56	1802.69
BMEI0580	murC	UDP-N-acetylmuramate--L-alanine ligase	1.14322	0.193104	0.0539097	3400.11	3887.08
BMEI0581	murB	UDP-N-acetylenolpyruvoylglucosamine reductase	1.06481	0.0906015	0.0711967	1656.37	1763.73
BMEI0582	ddl	D-alanine--D-alanine ligase	1.34529	0.427917	0.180868	840.157	1130.25
BMEI0583	-	CELL DIVISION PROTEIN FTSQ	1.86386	0.898296	0.953571	1778.09	3314.11
BMEI0584	-	CELL DIVISION PROTEIN FTSA	1.74859	0.806192	0.861868	2073.04	3624.9
BMEI0585	-	cell division protein FtsZ	1.54677	0.629256	0.177647	7973.4	12333
BMEI0586	lpxC	UDP-3-O-	1.06148	0.0860733	0.0710259	1632.96	1733.35
BMEI0587	-	COML, COMPETENCE LIPOPROTEIN	0.770561	-0.37602	0.0592135	7205.18	5552.02
BMEI0588	-	DNA REPAIR PROTEIN RECN	0.812044	-0.30037	0.120938	1459.07	1184.83
BMEI0589	ligA	NAD-dependent DNA ligase LigA	0.93224	-0.101227	0.0681158	1167.33	1088.23
BMEI0590	-	hypothetical protein BMEI0590	0.875843	-0.191256	0.0536785	802.853	703.173
BMEI0591	-	XAA-PRO AMINOPEPTIDASE	0.646193	-0.629963	0.481199	3807.27	2460.24
BMEI0592	prmA	ribosomal protein L11 methyltransferase	0.806844	-0.309639	0.127412	1690.9	1364.29
BMEI0593	-	SCO2 PROTEIN	0.277864	-1.84755	1	5394.57	1498.96
BMEI0594	-	CHLORAMPHENICOL ACETYLTRANSFERASE	0.820985	-0.284573	0.0947786	1041.88	855.365
BMEI0595	-	CREA PROTEIN	0.467209	-1.09786	0.997075	2058.23	961.622
BMEI0596	-	DNA HELICASE II	0.846143	-0.241027	0.100114	1598.9	1352.9
BMEI0597	-	serine/threonine protein kinase	0.932544	-0.100756	0.0651739	1085.67	1012.44
BMEI0598	-	hypothetical protein BMEI0598	0.693556	-0.527916	0.296896	3370.25	2337.46
BMEI0599	-	D-LACTATE DEHYDROGENASE (CYTOCHROME)	0.654033	-0.612564	0.512257	2324.68	1520.42
BMEI0600	-	Hypothetical Membrane Spanning Protein	1.03999	0.0565662	0.0583663	946.39	984.234
BMEI0601	-	hypothetical protein BMEI0601	0.946918	-0.0786881	0.0657809	2138.92	2025.38
BMEI0602	-	hypothetical protein BMEI0602	0.660957	-0.597372	0.413973	1149.74	759.925
BMEI0603	-	hypothetical protein BMEI0603	0.782245	-0.354307	0.0635498	6180.07	4834.33
BMEI0604	-	TRANSCRIPTIONAL REGULATOR, TETR FAMILY	1.09606	0.132323	0.0692717	2093.78	2294.9
BMEI0605	-	BICYCLOMYCIN RESISTANCE PROTEIN	4.59559	2.20025	1	4426.05	20340.3
BMEI0606	-	BICYCLOMYCIN RESISTANCE PROTEIN HOMOLOG	4.28393	2.09893	1	2927.52	12541.3
BMEI0607	-	Hypothetical Cytosolic Protein	1.21884	0.285511	0.0162566	10527.8	12831.8
BMEI0608	thyA	thymidylate synthase	0.935857	-0.0956402	0.0514691	3195.13	2990.18
BMEI0609	-	DIHYDROFOLATE REDUCTASE	0.836669	-0.257271	0.105363	1580.58	1322.42
BMEI0610	-	HFLK PROTEIN	0.27975	-1.83779	1	15927.9	4455.84
BMEI0611	-	HFLC PROTEIN	0.342113	-1.54745	0.999998	10505.3	3593.99
BMEI0612	-	hypothetical protein BMEI0612	0.670156	-0.577431	0.233197	775.955	520.011
BMEI0613	-	PROTEASE DO	0.548377	-0.866761	0.937352	2697.69	1479.35
BMEI0614	-	NAD(FAD)-utilizing dehydrogenase	0.649124	-0.623435	0.511992	1396.67	906.609
BMEI0615	-	PHOSPHOSERINE PHOSPHATASE	0.957144	-0.063192	0.0320013	651.625	623.699
BMEI0616	miaA	tRNA delta(2)-isopentenylpyrophosphate transferase	1.11029	0.150933	0.0366223	608.266	675.351
BMEI0617	-	acetolactate synthase 3 catalytic subunit	1.2047	0.268672	0.0659048	3452.13	4158.78
BMEI0618	ilvH	acetolactate synthase 3 regulatory subunit	1.10864	0.14879	0.0571316	2887.76	3201.49
BMEI0619	-	EXODEOXYRIBONUCLEASE V ALPHA CHAIN	1.49919	0.584186	0.393722	2362.27	3541.49
BMEI0620	-	hypothetical protein BMEI0620	3.91749	1.96993	1	4731.8	18536.8
BMEI0621	-	pyridoxal phosphate biosynthetic protein PdxJ	0.932442	-0.100914	0.0425244	750.133	699.455
BMEI0622	-	KUP SYSTEM POTASSIUM UPTAKE PROTEIN	1.52075	0.604783	0.499658	1397.75	2125.63
BMEI0623	-	TRANSCRIPTIONAL REGULATOR, TETR FAMILY	1.04422	0.0624275	0.0694477	1635.62	1707.94
BMEI0624	-	ketol-acid reductoisomerase	0.746637	-0.421522	0.0985525	5880.92	4390.91
BMEI0625	-	hypothetical protein BMEI0625	0.785551	-0.348224	0.148239	1582.43	1243.08
BMEI0626	-	TRANSCRIPTIONAL REGULATOR, GNTR FAMILY / MULTIPLE SUBSTRATE AMINOTRANSFERASE	0.488332	-1.03407	0.977619	10519.1	5136.82
BMEI0627	-	hypothetical protein BMEI0627	0.418824	-1.25558	0.999778	3556.69	1489.63
BMEI0628	-	hypothetical protein BMEI0628	1.09963	0.13702	0.0767994	1584.39	1742.25
BMEI0629	-	hypothetical protein BMEI0629	1.05816	0.0815584	0.0431592	720.583	762.493
BMEI0630	-	PHENAZINE BIOSYNTHESIS PROTEIN PHZF	0.810223	-0.303609	0.0835435	3783.47	3065.46
BMEI0631	-	hypothetical protein BMEI0631	2.70131	1.43366	0.99998	3993.41	10787.4
BMEI0632	-	Hypothetical Membrane Spanning Protein	1.2317	0.300652	0.00121364	51411	63323
BMEI0633	ccrB	camphor resistance protein CrcB	0.537325	-0.896133	0.848723	11089.5	5958.69
BMEI0634	-	INTEGRAL MEMBRANE PROTEIN	0.690735	-0.533795	0.271657	4105.38	2835.73
BMEI0635	-	COBALT TRANSPORT ATP-BINDING PROTEIN CBIO	0.809603	-0.304714	0.0974133	999.753	809.403
BMEI0637	-	COBALT TRANSPORT PROTEIN CBIQ	1.08415	0.116561	0.0644186	960.962	1041.83
BMEI0638	-	hypothetical protein BMEI0638	1.04309	0.0608615	0.0699583	1513.51	1578.72
BMEI0639	-	CBIM PROTEIN	1.38875	0.473782	0.170427	3369.24	4679.02
BMEI0640	-	CBIM PROTEIN	1.11829	0.161292	0.0805524	1575.9	1762.31
BMEI0641	-	hypothetical protein BMEI0641	0.99836	-0.00236732	0.0543105	2671.06	2666.68
BMEI0642	-	UREA TRANSPORTER	1.27803	0.353923	0.151921	1242.92	1588.49
BMEI0643	-	UREASE ACCESSORY PROTEIN URED	1.24111	0.311634	0.0870282	718.974	892.328
BMEI0644	-	UREASE ACCESSORY PROTEIN UREG	1.0434	0.0612872	0.0627112	1032.19	1076.98
BMEI0645	-	UREASE ACCESSORY PROTEIN UREF	1.25969	0.333067	0.117865	870.687	1096.8
BMEI0646	-	UREASE ACCESSORY PROTEIN UREE	0.981377	-0.0271202	0.0193087	530.463	520.584
BMEI0647	ureC	urease subunit alpha	0.861269	-0.215464	0.0607226	841.928	725.126
BMEI0648	ureB	urease subunit beta	0.972187	-0.0406939	0.067595	1294.14	1258.15
BMEI0649	ureA	urease subunit gamma	0.763504	-0.389293	0.149156	1103.85	842.793
BMEI0650	-	hypothetical protein BMEI0650	1.06063	0.0849242	0.050837	803.942	852.687
BMEI0651	-	Hypothetical Cytosolic Protein	1.01082	0.0155268	0.0639962	1129.7	1141.92
BMEI0652	-	hypothetical protein BMEI0652	0.394933	-1.34032	0.999952	3023.16	1193.94
BMEI0653	-	periplasmic component of efflux system	0.486845	-1.03846	0.992381	1739.13	846.688
BMEI0655	-	ABC TRANSPORTER ATP-BINDING PROTEIN	1.15088	0.202732	0.0761293	917.75	1056.22
BMEI0656	-	DAUNORUBICIN RESISTANCE TRANSMEMBRANE PROTEIN	1.24162	0.312221	0.0861315	712.26	884.354
BMEI0657	-	METAL CHELATE OUTER MEMBRANE RECEPTOR	0.696404	-0.522004	0.315267	1329.35	925.764
BMEI0658	-	METAL CHELATE PERIPLASMIC BINDING PROTEIN	0.678622	-0.559321	0.390279	1449.64	983.755
BMEI0659	-	METAL CHELATE TRANSPORT SYSTEM PERMEASE PROTEIN	0.800764	-0.320551	0.13126	1494.78	1196.97
BMEI0660	-	METAL CHELATE TRANSPORT ATP-BINDING PROTEIN	0.853379	-0.228742	0.0621757	837.422	714.638
BMEI0661	-	MYO-INOSITOL 2-DEHYDROGENASE	1.27081	0.345752	0.118014	818.478	1040.13
BMEI0662	-	D-RIBOSE-BINDING PERIPLASMIC PROTEIN PRECURSOR	2.03713	1.02654	0.992054	1413.76	2880
BMEI0663	-	D-RIBOSE-BINDING PERIPLASMIC PROTEIN PRECURSOR	2.12035	1.0843	0.996189	870.209	1845.15
BMEI0664	-	SUGAR TRANSPORT SYSTEM PERMEASE PROTEIN	1.49338	0.578584	0.425858	965.775	1442.27
BMEI0665	-	SUGAR TRANSPORT ATP-BINDING PROTEIN	1.24286	0.313662	0.0867109	712.42	885.437
BMEI0666	-	short chain dehydrogenase	1.40491	0.490482	0.270798	948.631	1332.74
BMEI0667	-	FUCOSE OPERON FUCU PROTEIN	0.923503	-0.114811	0.0667591	2314.04	2137.03
BMEI0668	-	CALCIUM BINDING PROTEIN	0.715618	-0.482738	0.0709916	10515.4	7525.05
BMEI0669	-	hypothetical protein BMEI0669	0.848485	-0.237038	0.0398053	655.015	555.771
BMEI0670	-	Putative membrane-associated alkaline phosphatase	0.687271	-0.541049	0.251422	4825.2	3316.22
BMEI0671	-	INTEGRAL MEMBRANE PROTEIN / HEMOLYSIN	0.871136	-0.19903	0.0852483	1294.73	1127.89
BMEI0672	-	hypothetical protein BMEI0672	3.71899	1.89491	1	3228.97	12008.5
BMEI0673	-	THIOSULFATE-BINDING PROTEIN PRECURSOR	0.8878	-0.171693	0.0776992	2163.51	1920.77
BMEI0674	-	SULFATE TRANSPORT SYSTEM PERMEASE PROTEIN CYST	0.98517	-0.0215554	0.0475536	820.147	807.984
BMEI0675	-	SULFATE TRANSPORT SYSTEM PERMEASE PROTEIN CYSW	1.05818	0.0815859	0.0359956	650.847	688.714
BMEI0676	-	hypothetical protein BMEI0676	0.930118	-0.104515	0.0229701	565.955	526.404
BMEI0677	-	hypothetical protein BMEI0677	0.720772	-0.472384	0.240417	1256.91	905.946
BMEI0678	-	LOW PH-INDUCED PROTEIN A	0.538008	-0.8943	0.728849	17857.7	9607.57
BMEI0679	-	POTASSIUM/PROTON ANTIPORTER ROSB	0.865629	-0.20818	0.0838359	2275.18	1969.46
BMEI0680	-	bifunctional preprotein translocase subunit SecD/SecF	0.637771	-0.648889	0.316022	8306.44	5297.61
BMEI0682	-	POTASSIUM EFFLUX SYSTEM KEFA	0.777275	-0.363502	0.158981	1659.24	1289.68
BMEI0683	-	hypothetical protein BMEI0683	1.02526	0.0359933	0.0668833	1800.68	1846.17
BMEI0684	-	SARCOSINE DEHYDROGENASE	1.15582	0.208921	0.0660981	784.825	907.119
BMEI0685	-	TRANSCRIPTIONAL REGULATOR, ARAC FAMILY	0.869731	-0.201358	0.0554403	808.979	703.595
BMEI0686	-	TRANSCRIPTIONAL REGULATORY PROTEIN, LYSR FAMILY	0.948736	-0.0759216	0.0601312	2502.8	2374.5
BMEI0687	-	hypothetical protein BMEI0687	0.842285	-0.24762	0.096743	2177.52	1834.09
BMEI0688	-	3-HYDROXYISOBUTYRATE DEHYDROGENASE	1.01089	0.0156228	0.0640675	2004.86	2026.69
BMEI0689	-	ACYL-COA DEHYDROGENASE, SHORT-CHAIN SPECIFIC	1.03678	0.0521062	0.0590357	964.196	999.656
BMEI0690	-	cobyric acid synthase	1.26573	0.339969	0.136842	1055.13	1335.52
BMEI0691	-	hypothetical protein BMEI0691	0.160689	-2.63765	1	7701.3	1237.52
BMEI0692	-	hypothetical protein BMEI0692	0.342562	-1.54556	0.999999	3182.55	1090.22
BMEI0693	cobU	adenosylcobinamide kinase/adenosylcobinamide-phosphate guanylyltransferase	0.495689	-1.01249	0.988908	1691.46	838.44
BMEI0694	-	COBW PROTEIN	0.401042	-1.31817	0.999925	3898.25	1563.36
BMEI0695	cobN	cobaltochelatase	0.647945	-0.626056	0.52434	1454.58	942.485
BMEI0696	-	cob(I)yrinic acid a,c-diamide adenosyltransferase	0.465057	-1.10452	0.99708	1778.94	827.307
BMEI0697	-	TRANSPORTER, DME FAMILY	0.721304	-0.471321	0.216158	3367.31	2428.86
BMEI0698	-	TRANSPORTER	0.888114	-0.171183	0.0793418	1267.85	1126
BMEI0699	-	hypothetical protein BMEI0699	1.139	0.187771	0.0721467	905.634	1031.52
BMEI0700	-	PRECORRIN-3B C17-METHYLTRANSFERASE	1.00129	0.00185787	0.0463459	800.025	801.056
BMEI0701	-	PRECORRIN-4 C11-METHYLTRANSFERASE	1.1726	0.22971	0.0930093	1760.75	2064.65
BMEI0702	-	cobalt-precorrin-6x reductase	1.0009	0.00130039	0.0434269	765.016	765.706
BMEI0703	cbiD	cobalt-precorrin-6A synthase	1.09151	0.126326	0.0668199	984.615	1074.72
BMEI0704	-	UROPORPHYRIN-III C-METHYLTRANSFERASE	1.20492	0.268932	0.104251	1806.67	2176.88
BMEI0705	-	cobyrinic acid a,c-diamide synthase	1.06988	0.097453	0.0675999	1084.22	1159.99
BMEI0706	-	COBC PROTEIN	1.00446	0.00642048	0.0437096	766.817	770.238
BMEI0707	-	CBIB PROTEIN	1.08405	0.116425	0.0745088	1540.74	1670.23
BMEI0708	-	LEUCINE-, ISOLEUCINE-, VALINE-, THREONINE-, AND ALANINE-BINDING PROTEIN PRECURSOR	1.12317	0.167573	0.0726063	975.318	1095.45
BMEI0709	-	4-HYDROXYPHENYLACETATE 3-MONOOXYGENASE	0.93804	-0.0922782	0.0690953	1979.84	1857.17
BMEI0710	-	hypothetical protein BMEI0710	0.993468	-0.00945503	0.061803	1073.75	1066.74
BMEI0711	-	hypothetical protein BMEI0711	0.888732	-0.170179	0.0784135	1239.58	1101.66
BMEI0712	-	CBIG PROTEIN / PRECORRIN-3B C17-METHYLTRANSFERASE	1.23512	0.304647	0.113907	981.89	1212.75
BMEI0713	-	precorrin-2 C(20)-methyltransferase	1.08081	0.11211	0.0489244	754.444	815.409
BMEI0714	cobH	precorrin-8X methylmutase	1.07797	0.108317	0.0539532	816.617	880.289
BMEI0715	-	COBG PROTEIN	1.44119	0.527264	0.349473	1331.51	1918.97
BMEI0716	-	PRECORRIN-6Y C5,15-METHYLTRANSFERASE (DECARBOXYLATING)	1.01778	0.0254247	0.0577554	963.75	980.885
BMEI0717	-	22 KDA OUTER MEMBRANE PROTEIN PRECURSOR	0.102441	-3.28714	1	14437.2	1478.96
BMEI0718	radC	DNA repair protein RadC	0.904146	-0.145372	0.0696626	1093.47	988.653
BMEI0719	-	methionine aminopeptidase	0.413536	-1.27391	0.999794	5529.09	2286.48
BMEI0720	-	sugar fermentation stimulation protein A	1.0144	0.0206221	0.0679774	1639.14	1662.74
BMEI0721	-	Hypothetical Cytosolic Protein	1.02343	0.0334126	0.037375	4003.09	4096.89
BMEI0722	-	hypothetical protein BMEI0722	0.897572	-0.155901	0.0687153	1048.35	940.968
BMEI0723	-	hypothetical protein BMEI0723	1.92727	0.946557	0.976214	1051.05	2025.65
BMEI0724	-	aminotransferase	1.01027	0.0147431	0.0481253	3092.01	3123.77
BMEI0725	-	homoserine dehydrogenase	1.13032	0.176727	0.0778156	1963.04	2218.86
BMEI0726	glpX	fructose 1,6-bisphosphatase II	1.23021	0.298906	0.11849	1124.28	1383.1
BMEI0727	-	D-ALANINE--D-ALANINE LIGASE A	0.924564	-0.113156	0.0146764	9250.27	8552.47
BMEI0728	-	SINGLE-STRANDED-DNA-SPECIFIC EXONUCLEASE RECJ	0.812741	-0.299132	0.122382	1664.96	1353.18
BMEI0729	-	TRANSPORTER	0.447092	-1.16136	0.998229	6849.61	3062.4
BMEI0730	-	LACTOYLGLUTATHIONE LYASE	1.09105	0.125717	0.0742055	1218.97	1329.95
BMEI0731	-	COLD SHOCK PROTEIN	1.2464	0.317768	0.1026	2549.12	3177.23
BMEI0732	-	Hypothetical Cytosolic Protein	1.29588	0.373934	0.0378707	7673.15	9943.49
BMEI0733	-	NON-HEME CHLOROPEROXIDASE	0.978756	-0.0309793	0.0559348	2612.9	2557.39
BMEI0734	-	SERINE ACETYLTRANSFERASE	1.31338	0.393279	0.148363	2394.88	3145.38
BMEI0735	-	hypothetical protein BMEI0735	0.638076	-0.648201	0.566068	1404.66	896.28
BMEI0736	-	FERRIPYOCHELIN BINDING PROTEIN	1.18608	0.246204	0.0918465	2040.01	2419.62
BMEI0737	-	hypothetical protein BMEI0737	1.06835	0.095389	0.0646146	2170.77	2319.15
BMEI0738	-	hypothetical protein BMEI0738	0.73803	-0.438249	0.201513	1228.88	906.954
BMEI0739	-	INTEGRAL MEMBRANE PROTEIN (Rhomboid family)	0.787717	-0.344251	0.0393665	8586.25	6763.53
BMEI0740	-	INOSINE-5'-MONOPHOSPHATE DEHYDROGENASE	2.35138	1.23351	0.99681	11062.9	26013.2
BMEI0741	-	23S ribosomal RNA methyltransferase	1.74439	0.802724	0.877288	1399.08	2440.54
BMEI0742	tuf	elongation factor Tu	0.896368	-0.157837	0.00524695	19199.9	17210.2
BMEI0743	secE	preprotein translocase subunit SecE	1.52327	0.607172	0.0461837	18060	27510.3
BMEI0744	nusG	transcription antitermination protein NusG	1.15693	0.210299	0.0722274	2545.33	2944.77
BMEI0745	rplK	50S ribosomal protein L11	0.643975	-0.634923	0.0913898	20801.7	13395.8
BMEI0746	rplA	50S ribosomal protein L1	0.739676	-0.435034	0.0196242	19789.5	14637.8
BMEI0747	rplJ	50S ribosomal protein L10	0.720859	-0.472212	0.0131962	29702.3	21411.2
BMEI0748	rplL	50S ribosomal protein L7/L12	0.626687	-0.674182	0.316838	9969	6247.44
BMEI0749	rpoB	DNA-directed RNA polymerase subunit beta	1.23793	0.307931	0.0249823	8368.36	10359.5
BMEI0750	-	DNA-directed RNA polymerase subunit beta'	0.993072	-0.0100301	0.0095924	11127.2	11050.1
BMEI0751	-	hypothetical protein BMEI0751	1.06357	0.0889136	0.0466805	752.133	799.945
BMEI0752	rpsL	30S ribosomal protein S12	2.40091	1.26358	0.999224	6104.6	14656.6
BMEI0753	-	30S ribosomal protein S7	1.61046	0.687468	0.17882	11181.8	18007.8
BMEI0754	-	elongation factor G	1.28737	0.364423	0.0121533	15623.7	20113.4
BMEI0755	tuf	elongation factor Tu	0.896311	-0.157928	0.00638699	17021.6	15256.6
BMEI0756	rpsJ	30S ribosomal protein S10	0.890289	-0.167654	0.0471264	4129.88	3676.78
BMEI0757	rplC	50S ribosomal protein L3	0.959998	-0.0588967	0.0335821	4618.71	4433.95
BMEI0758	rplD	50S ribosomal protein L4	0.833111	-0.263419	0.0193202	10711.1	8923.52
BMEI0759	rplW	50S ribosomal protein L23	0.810974	-0.302272	0.0284598	9284.07	7529.14
BMEI0760	rplB	50S ribosomal protein L2	0.822081	-0.282647	0.0134272	14390.2	11829.9
BMEI0761	rpsS	30S ribosomal protein S19	0.596829	-0.744611	0.26449	19537.5	11660.6
BMEI0762	rplV	50S ribosomal protein L22	0.632034	-0.661926	0.273561	10557.1	6672.46
BMEI0763	rpsC	30S ribosomal protein S3	0.721742	-0.470445	0.0358077	15827	11423
BMEI0764	rplP	50S ribosomal protein L16	0.69588	-0.52309	0.0165008	33014.4	22974.1
BMEI0765	-	50S ribosomal protein L29	0.893476	-0.162499	0.00906993	13781.9	12313.8
BMEI0766	rpsQ	30S ribosomal protein S17	0.868399	-0.203571	0.00444719	23222.8	20166.7
BMEI0767	rplN	50S ribosomal protein L14	0.585181	-0.773045	0.449548	14286.6	8360.23
BMEI0768	rplX	50S ribosomal protein L24	0.630854	-0.664623	0.0425254	40617.1	25623.5
BMEI0769	rplE	50S ribosomal protein L5	0.629104	-0.66863	0.0689785	30789	19369.5
BMEI0770	rpsN	30S ribosomal protein S14	0.576216	-0.79532	0.355463	21738	12525.8
BMEI0771	rpsH	30S ribosomal protein S8	0.67186	-0.573767	0.124939	11490	7719.67
BMEI0772	rplF	50S ribosomal protein L6	0.610407	-0.712156	0.278215	14830.7	9052.76
BMEI0773	rplR	50S ribosomal protein L18	0.669654	-0.578511	0.0764823	16815.2	11260.4
BMEI0774	rpsE	30S ribosomal protein S5	0.565462	-0.822498	0.798347	7043.99	3983.11
BMEI0775	rpmD	50S ribosomal protein L30	0.575025	-0.798303	0.506244	15009.5	8630.84
BMEI0776	rplO	50S ribosomal protein L15	0.6236	-0.681307	0.543142	4992.81	3113.52
BMEI0777	secY	preprotein translocase subunit SecY	0.598111	-0.741515	0.262623	19224.9	11498.6
BMEI0778	adk	adenylate kinase	0.652727	-0.615449	0.220992	9338.22	6095.3
BMEI0779	rpsM	30S ribosomal protein S13	1.23063	0.299391	0.00737869	17839.7	21954
BMEI0780	-	30S ribosomal protein S11	0.951733	-0.0713715	0.0115705	10296.2	9799.25
BMEI0781	-	DNA-directed RNA polymerase subunit alpha	1.10608	0.145453	0.0124299	9851.41	10896.4
BMEI0782	rplQ	50S ribosomal protein L17	0.852311	-0.230547	0.0654614	3601.08	3069.25
BMEI0783	-	PROTEASE DO	0.486983	-1.03806	0.990983	4912.47	2392.29
BMEI0784	-	recombination factor protein RarA	0.983782	-0.0235897	0.0683257	1415.16	1392.21
BMEI0785	-	TRANSCRIPTIONAL REGULATORY PROTEIN	1.48103	0.566596	0.107835	8306.66	12302.4
BMEI0786	-	OUTER MEMBRANE PROTEIN	0.756447	-0.402689	0.0318233	12627.7	9552.21
BMEI0787	recA	recombinase A	1.24326	0.314129	0.0862717	3093.74	3846.32
BMEI0788	-	hypothetical protein BMEI0788	1.15528	0.20824	0.0734538	2468.07	2851.31
BMEI0789	alaS	alanyl-tRNA synthetase	1.04463	0.0629923	0.0565518	2564.67	2679.13
BMEI0790	-	bacterial alkaline phosphatase	0.932353	-0.101051	0.0586523	956.004	891.333
BMEI0791	-	isocitrate dehydrogenase	0.911599	-0.133529	0.0338119	5144	4689.27
BMEI0792	-	INTRACELLULAR PROTEINASE I	0.791762	-0.336861	0.13243	2368.88	1875.59
BMEI0793	-	PROTEASE I	1.12543	0.170482	0.0521901	3340.09	3759.06
BMEI0794	-	SPOU family of rRNA methylase	0.963102	-0.0542391	0.0690391	1697.71	1635.07
BMEI0795	-	glutamate racemase	3.28315	1.71508	1	4318.09	14176.9
BMEI0796	-	31 KDA IMMUNOGENIC PROTEIN PRECURSOR	0.974474	-0.037305	0.0478779	3196.61	3115.01
BMEI0797	-	TRANSPORTER	0.98661	-0.019448	0.0353856	4265.63	4208.52
BMEI0798	-	hypothetical protein BMEI0798	2.75935	1.46433	0.999983	5544.27	15298.6
BMEI0799	-	methylmalonyl-CoA mutase	1.36626	0.450232	0.213829	903.379	1234.25
BMEI0800	-	PROPIONYL-COA CARBOXYLASE ALPHA CHAIN, MITOCHONDRIAL	1.2501	0.32204	0.0833916	676.007	845.074
BMEI0801	-	PROPIONYL-COA CARBOXYLASE BETA CHAIN	1.32579	0.406852	0.176773	948.294	1257.24
BMEI0802	-	TRANSCRIPTIONAL REGULATOR, MERR FAMILY	1.41264	0.498391	0.206881	658.92	930.815
BMEI0803	-	hypothetical protein BMEI0803	2.82791	1.49974	0.999998	1018.87	2881.29
BMEI0804	-	7-cyano-7-deazaguanine reductase	2.71829	1.4427	0.999942	9700.53	26368.8
BMEI0805	-	hypothetical protein BMEI0805	3.79178	1.92288	1	10498.1	39806.5
BMEI0806	-	hypothetical protein BMEI0806	0.943555	-0.0838222	0.0609652	2489.51	2348.99
BMEI0807	-	hypothetical protein BMEI0807	1.21543	0.281464	0.113452	1223.31	1486.84
BMEI0808	-	TRANSCRIPTIONAL REGULATOR, MERR FAMILY	0.970558	-0.0431136	0.0691138	1478.1	1434.58
BMEI0809	-	hypothetical protein BMEI0809	0.893081	-0.163138	0.0614258	3058.3	2731.31
BMEI0810	-	hypothetical protein BMEI0810	1.04825	0.0679826	0.0687558	1234.51	1294.08
BMEI0811	-	L-SERINE DEHYDRATASE 1	0.398663	-1.32676	0.999927	4975.17	1983.42
BMEI0812	-	hypothetical protein BMEI0812	0.46883	-1.09286	0.996949	2227.72	1044.42
BMEI0813	-	hypothetical protein BMEI0813	0.65617	-0.607859	0.124839	14144.9	9281.44
BMEI0814	-	PENICILLIN-BINDING PROTEIN 6 (D-ALANYL-D-ALANINE CARBOXYPEPTIDASE FRACTION C)	0.75222	-0.410773	0.0361884	11986.8	9016.75
BMEI0815	clpS	ATP-dependent Clp protease adaptor protein ClpS	0.397878	-1.3296	0.999626	20605.3	8198.4
BMEI0816	-	ATP-DEPENDENT CLP PROTEASE ATP-BINDING SUBUNIT CLPA	0.462549	-1.11232	0.988064	15990.6	7396.45
BMEI0817	-	BIS(5'-NUCLEOSYL)-TETRAPHOSPHATASE (ASYMMETRICAL)	0.960972	-0.0574333	0.0638148	2171.54	2086.79
BMEI0818	-	Hypothetical Cytosolic Protein	0.939299	-0.0903433	0.0672541	1165.31	1094.58
BMEI0819	-	GLYCEROPHOSPHORYL DIESTER PHOSPHODIESTERASE	1.03448	0.048905	0.0559107	2579.01	2667.93
BMEI0820	-	TRANSLATION INITIATION INHIBITOR	0.861707	-0.21473	0.0685063	3210.75	2766.73
BMEI0821	-	hypothetical protein BMEI0821	1.04234	0.0598258	0.0066283	13975	14566.7
BMEI0822	-	hypothetical protein BMEI0822	0.835015	-0.260125	0.00117204	57805.1	48268.2
BMEI0823	rpsB	30S ribosomal protein S2	0.652609	-0.61571	0.108519	16426	10719.8
BMEI0824	tsf	elongation factor Ts	0.751762	-0.411652	0.0654406	7853.42	5903.9
BMEI0825	pyrH	uridylate kinase	1.049	0.0690197	0.0687058	1227.21	1287.34
BMEI0826	frr	ribosome recycling factor	0.943168	-0.0844128	0.0102609	11303.8	10661.4
BMEI0827	-	UNDECAPRENYL PYROPHOSPHATE SYNTHETASE	0.772647	-0.372118	0.162882	2023.72	1563.62
BMEI0828	-	PHOSPHATIDATE CYTIDYLYLTRANSFERASE	0.826683	-0.274594	0.05397	5131.36	4242.01
BMEI0829	-	Membrane Metalloprotease	0.784515	-0.350126	0.144651	2184.38	1713.68
BMEI0830	-	OUTER MEMBRANE PROTEIN	0.858058	-0.220853	0.011231	13636.6	11701
BMEI0831	lpxD	UDP-3-O-	0.972642	-0.0400185	0.0686229	1656.18	1610.87
BMEI0832	fabZ	(3R)-hydroxymyristoyl-(acyl carrier protein) dehydratase	0.877861	-0.187936	0.0359613	5525.06	4850.23
BMEI0833	-	UDP-N-acetylglucosamine acyltransferase	0.826114	-0.275588	0.0753297	3720.76	3073.77
BMEI0834	-	hypothetical protein BMEI0834	1.06349	0.0888074	0.071719	1355.49	1441.55
BMEI0835	lpxB	lipid-A-disaccharide synthase	0.984605	-0.0223824	0.0654767	1198.63	1180.17
BMEI0836	gltA	type II citrate synthase	0.522343	-0.936929	0.952846	6265.52	3272.75
BMEI0837	gltX	glutamyl-tRNA synthetase	0.835567	-0.259173	0.100235	1273.87	1064.4
BMEI0838	-	COME OPERON PROTEIN 3	1.10989	0.150421	0.0393982	630.778	700.096
BMEI0839	-	COME OPERON PROTEIN 3	1.13856	0.187208	0.0859772	1333.24	1517.97
BMEI0840	-	LexA repressor	1.2198	0.286644	0.115219	1202.37	1466.64
BMEI0841	-	MOLYBDOPTERIN BIOSYNTHESIS MOEA PROTEIN	0.843736	-0.245137	0.10043	1851.01	1561.76
BMEI0842	moaC	molybdenum cofactor biosynthesis protein C	0.963099	-0.0542436	0.0677541	1846.28	1778.15
BMEI0843	trpC	indole-3-glycerol-phosphate synthase	0.79237	-0.335754	0.113095	1036	820.895
BMEI0844	trpD	anthranilate phosphoribosyltransferase	0.876051	-0.190913	0.08363	1296.03	1135.39
BMEI0845	-	PEPTIDYL-PROLYL CIS-TRANS ISOMERASE D	0.799687	-0.322493	0.0480307	6786.26	5426.88
BMEI0846	tpiA	triosephosphate isomerase	0.923025	-0.115558	0.0675892	2265.41	2091.03
BMEI0847	secG	preprotein translocase subunit SecG	0.991033	-0.0129944	0.0532689	2755.66	2730.95
BMEI0848	-	PROBABLE CARNITINE OPERON OXIDOREDUCTASE CAIA	0.742885	-0.42879	0.214455	1666.3	1237.87
BMEI0849	-	CTP synthetase	1.25358	0.32605	0.0720157	3895.1	4882.8
BMEI0850	-	2-dehydro-3-deoxyphosphooctonate aldolase	0.395593	-1.33791	0.99994	5043.38	1995.12
BMEI0851	-	ENOLASE	0.7041	-0.506147	0.287639	1291.6	909.418
BMEI0852	-	METHYLTRANSFERASE	0.86451	-0.210045	0.0727679	986.534	852.869
BMEI0853	-	hypothetical protein BMEI0853	1.52031	0.60437	0.434353	2364.27	3594.43
BMEI0854	-	PYRUVATE DEHYDROGENASE E1 COMPONENT, ALPHA SUBUNIT	0.554887	-0.849735	0.630735	16374.5	9086
BMEI0855	-	pyruvate dehydrogenase subunit beta	0.579261	-0.787713	0.546939	12367.3	7163.93
BMEI0856	-	branched-chain alpha-keto acid dehydrogenase subunit E2	0.631998	-0.662009	0.378352	7453.17	4710.39
BMEI0857	-	dihydrolipoamide dehydrogenase	0.544704	-0.876454	0.859146	8609.51	4689.64
BMEI0858	-	hypothetical protein BMEI0858	0.599405	-0.738396	0.472161	10237.2	6136.23
BMEI0859	-	lipoyl synthase	0.530265	-0.915215	0.838952	13952.8	7398.68
BMEI0860	-	Hypothetical Cytosolic Protein	0.594242	-0.750879	0.792458	1630.39	968.847
BMEI0861	-	GLUCOSE 1-DEHYDROGENASE II	0.765472	-0.385578	0.140838	3205.87	2454
BMEI0862	-	PUTATIVE COMPETENCE-DAMAGE PROTEIN	1.05347	0.0751543	0.0448863	743.588	783.351
BMEI0863	ispDF	bifunctional 2-C-methyl-D-erythritol 4-phosphate cytidylyltransferase/2-C-methyl-D-erythritol 2,4-cyclodiphosphate synthase protein	0.870111	-0.200729	0.08512	2081.31	1810.97
BMEI0864	-	NITROGEN REGULATION PROTEIN NIFR3	0.820339	-0.285707	0.109855	2235.74	1834.06
BMEI0865	-	NITROGEN REGULATION PROTEIN NTRB	0.802894	-0.316719	0.130946	1736.76	1394.44
BMEI0866	-	NITROGEN ASSIMILATION REGULATORY PROTEIN	0.872868	-0.196164	0.0728148	2740.51	2392.1
BMEI0867	-	NITROGEN REGULATION PROTEIN NTRY	1.223	0.290422	0.117136	1556.06	1903.06
BMEI0868	-	NITROGEN ASSIMILATION REGULATORY PROTEIN NTRX	1.03849	0.0544914	0.0681666	1739.26	1806.21
BMEI0869	trkA	potassium transporter peripheral membrane component	1.08002	0.111057	0.0646123	976.944	1055.12
BMEI0870	-	hypothetical protein BMEI0870	0.605699	-0.723328	0.72128	3378.14	2046.14
BMEI0871	-	hypothetical protein BMEI0871	0.76605	-0.384489	0.171908	1508.12	1155.29
BMEI0872	hfq	RNA-binding protein Hfq	0.724404	-0.465134	0.24848	2314.45	1676.6
BMEI0873	-	GTP-BINDING PROTEIN HFLX	0.916094	-0.126432	0.05185	840.503	769.98
BMEI0874	clpP	ATP-dependent Clp protease proteolytic subunit	0.572286	-0.805193	0.816738	5264.71	3012.92
BMEI0875	clpX	ATP-dependent protease ATP-binding subunit	1.06064	0.0849298	0.0044644	17972.1	19061.8
BMEI0876	-	ATP-DEPENDENT PROTEASE LA	0.641693	-0.640044	0.20851	11593.9	7439.7
BMEI0877	-	DNA-BINDING PROTEIN HU-ALPHA	0.94327	-0.084257	0.00326636	22992.8	21688.4
BMEI0878	uvrA	excinuclease ABC subunit A	0.630075	-0.666404	0.623103	2658.33	1674.95
BMEI0879	-	hypothetical protein BMEI0879	1.30271	0.381521	0.0421676	437.871	570.421
BMEI0880	-	SINGLE-STRAND BINDING PROTEIN	1.08184	0.113487	0.0606759	2488.49	2692.15
BMEI0881	-	TRANSCRIPTIONAL REGULATOR, GNTR FAMILY	1.24984	0.321741	0.0770929	3588.74	4485.34
BMEI0882	-	PHOSPHONATES TRANSPORT ATP-BINDING PROTEIN PHNN	1.1243	0.169032	0.0762967	1048.91	1179.3
BMEI0883	-	MULTIPLE ANTIBIOTIC RESISTANCE PROTEIN MARC	1.02563	0.036504	0.0530832	2750.08	2820.55
BMEI0884	-	DNA gyrase subunit A	1.06077	0.085113	0.0510975	2980.15	3161.26
BMEI0885	-	hypothetical protein BMEI0885	2.88434	1.52824	0.999973	17164.3	49507.7
BMEI0886	coaD	phosphopantetheine adenylyltransferase	0.635529	-0.653971	0.58432	2907	1847.48
BMEI0887	-	PEPTIDYL-PROLYL CIS-TRANS ISOMERASE	0.580876	-0.783697	0.571094	11189.5	6499.73
BMEI0888	-	PEPTIDYL-PROLYL CIS-TRANS ISOMERASE A	0.664373	-0.589935	0.446719	1428.26	948.894
BMEI0889	queA	S-adenosylmethionine:tRNA ribosyltransferase-isomerase	0.665406	-0.587693	0.462034	2183.49	1452.91
BMEI0890	tgt	queuine tRNA-ribosyltransferase	0.945025	-0.0815758	0.0617458	1033.74	976.913
BMEI0891	-	TRANSCRIPTIONAL REGULATOR, TETR FAMILY	0.859187	-0.218956	0.0910276	1346.69	1157.06
BMEI0892	-	MEMBRANE FUSION PROTEIN MTRC	0.756685	-0.402235	0.187286	1546.9	1170.52
BMEI0893	-	ACRIFLAVIN RESISTANCE PROTEIN B	0.833783	-0.262255	0.0973002	1183.71	986.959
BMEI0894	-	ALKANAL MONOOXYGENASE ALPHA CHAIN	0.963165	-0.0541455	0.0673913	1253	1206.84
BMEI0895	-	TRANSCRIPTIONAL REGULATORY PROTEIN, LYSR FAMILY	1.01796	0.0256749	0.0545054	905.689	921.952
BMEI0896	-	TRANSCRIPTIONAL REGULATORY PROTEIN, LYSR FAMILY	1.07835	0.108828	0.0721997	1722.22	1857.16
BMEI0897	-	GLUTARYL-COA DEHYDROGENASE	0.570961	-0.808537	0.846178	4405.95	2515.62
BMEI0898	-	Predicted acyl-CoA transferase/carnitine dehydratase	0.621116	-0.687065	0.680835	1991.94	1237.23
BMEI0899	-	PHAGE-RELATED DNA BINDING PROTEIN	1.27826	0.35418	0.129091	866.273	1107.32
BMEI0900	-	hypothetical protein BMEI0900	1.63989	0.713595	0.635717	657.366	1078
BMEI0901	-	RESOLVASE	0.48021	-1.05826	0.988646	8221.18	3947.89
BMEI0902	-	RECOMBINASE	0.590388	-0.760264	0.399404	14816	8747.17
BMEI0903	-	hypothetical protein BMEI0903	1.20994	0.274932	0.0683254	3400.71	4114.65
BMEI0904	-	hypothetical protein BMEI0904	1.30346	0.382351	0.048922	6572.26	8566.71
BMEI0905	-	hypothetical protein BMEI0905	0.867549	-0.204983	0.0612677	861.504	747.397
BMEI0906	-	hypothetical protein BMEI0906	0.774819	-0.368068	0.150711	1281.45	992.893
BMEI0908	-	SERINE PROTEASE	0.73041	-0.453221	0.23806	2151.14	1571.22
BMEI0909	hisI	phosphoribosyl-AMP cyclohydrolase	0.639746	-0.64443	0.567966	1494.87	956.336
BMEI0910	folE	GTP cyclohydrolase I	0.634341	-0.65667	0.409811	6433.14	4080.81
BMEI0911	-	NIFU PROTEIN	1.59708	0.675439	0.40222	4800.88	7667.41
BMEI0912	-	hypothetical protein BMEI0912	0.994088	-0.00855483	0.0673559	1316.18	1308.39
BMEI0913	-	PENICILLIN-BINDING PROTEIN 6 (D-ALANYL-D-ALANINE CARBOXYPEPTIDASE FRACTION C)	0.671941	-0.573593	0.357935	1099.7	738.935
BMEI0914	-	PENICILLIN-BINDING PROTEIN 6 (D-ALANYL-D-ALANINE CARBOXYPEPTIDASE FRACTION C)	0.989952	-0.0145695	0.0534948	904.516	895.427
BMEI0915	thrS	threonyl-tRNA synthetase	0.661375	-0.59646	0.430544	3343.81	2211.51
BMEI0916	-	hypothetical protein BMEI0916	0.900133	-0.151791	0.0673917	2587.04	2328.68
BMEI0917	-	Nitroreductase family	1.03083	0.0438022	0.0311932	4703.02	4848
BMEI0918	-	Nitroreductase family	1.00665	0.00956216	0.0662029	1829.99	1842.16
BMEI0919	-	NITRILOTRIACETATE MONOOXYGENASE COMPONENT B	0.988084	-0.0172946	0.068333	1441.66	1424.48
BMEI0920	mazG	nucleoside triphosphate pyrophosphohydrolase	0.771142	-0.374931	0.165387	1533.41	1182.47
BMEI0921	-	UDP-GLUCOSE 4-EPIMERASE	0.848321	-0.237318	0.0889346	1154.91	979.736
BMEI0922	-	SODIUM/BILE ACID COTRANSPORTER HOMOLOG, SBF FAMILY	0.86852	-0.203369	0.0838533	2203.87	1914.1
BMEI0923	-	3-DEMETHYLUBIQUINONE-9 3-METHYLTRANSFERASE	1.04962	0.0698681	0.0585196	933.048	979.346
BMEI0924	-	XAA-PRO DIPEPTIDASE	0.829269	-0.270088	0.0789095	917.8	761.104
BMEI0925	-	ALCOHOL DEHYDROGENASE	0.520335	-0.942488	0.975518	2534.23	1318.65
BMEI0926	-	MULTIDRUG RESISTANCE PROTEIN A	0.858569	-0.219994	0.0932652	1469.39	1261.57
BMEI0927	-	MULTIDRUG RESISTANCE PROTEIN B	0.955879	-0.0650997	0.0689867	1320.89	1262.61
BMEI0928	-	ACETATE COA-TRANSFERASE ALPHA SUBUNIT	0.805863	-0.311393	0.0908364	3575.65	2881.49
BMEI0929	-	Diguanylate cyclase/phosphodiesterase domain 1 (GGDEF)	1.5929	0.671654	0.61546	875.869	1395.17
BMEI0930	-	ACETYLTRANSFERASE	4.27424	2.09567	1	3861.69	16505.8
BMEI0931	-	PUTATIVE THIOSULFATE SULFURTRANSFERASE	3.22653	1.68998	1	10804.6	34861.3
BMEI0932	-	ALANYL-TRNA SYNTHETASE	0.834725	-0.260627	0.105068	1441.83	1203.53
BMEI0933	-	cysteine synthase A	0.79887	-0.323967	0.131969	1445.41	1154.7
BMEI0934	-	ATP-DEPENDENT RNA HELICASE RHLE	3.11213	1.6379	1	1602.78	4988.07
BMEI0935	-	threonine dehydratase	0.623038	-0.682608	0.663355	2539.12	1581.97
BMEI0936	-	TrpR binding protein WrbA	0.917372	-0.124421	0.0663585	1068.46	980.178
BMEI0937	-	PUTATIVE COMPETENCE-DAMAGE PROTEIN	0.811013	-0.302202	0.117067	2241.43	1817.83
BMEI0938	-	Universal stress protein UspA and related nucleotide-binding proteins	0.72747	-0.459041	0.133723	5478.7	3985.59
BMEI0939	-	hypothetical protein BMEI0939	0.998968	-0.00148994	0.0637991	1133.05	1131.88
BMEI0940	-	xanthine-guanine phosphoribosyltransferase	1.2998	0.378289	0.163594	1710.27	2223
BMEI0941	-	BIS(5'-NUCLEOSYL)-TETRAPHOSPHATASE (ASYMMETRICAL)	1.1858	0.245863	0.0470435	4406.86	5225.67
BMEI0942	-	hypothetical protein BMEI0942	2.00638	1.00459	0.988255	901.926	1809.6
BMEI0943	-	ribonucleotide-diphosphate reductase subunit alpha	1.85916	0.894649	0.93493	2697.8	5015.63
BMEI0944	-	putative transport	0.785401	-0.348498	0.141992	2259.6	1774.69
BMEI0945	-	6-AMINOHEXANOATE-DIMER HYDROLASE	1.16344	0.218399	0.0930175	1535.42	1786.38
BMEI0946	-	NAD(FAD)-utilizing dehydrogenase	1.04527	0.0638715	0.0631613	1039.12	1086.16
BMEI0947	-	Sensory Transduction Protein Kinase	1.0698	0.0973434	0.0658416	1036.54	1108.89
BMEI0948	-	hypothetical protein BMEI0948	0.276803	-1.85307	1	14909.9	4127.09
BMEI0949	-	DNAK SUPPRESSOR PROTEIN HOMOLOG	0.497552	-1.00708	0.987976	3943.7	1962.2
BMEI0950	-	PHOSPHOHISTIDINE PHOSPHATASE SIXA	0.926009	-0.110901	0.0733347	1756.33	1626.38
BMEI0951	-	amino acid regulated cytosolic protein	0.305552	-1.71051	1	5718.1	1747.18
BMEI0952	-	hypothetical protein BMEI0952	0.420619	-1.24941	0.999759	3191.26	1342.31
BMEI0953	-	hypothetical protein BMEI0953	1.17991	0.238683	0.0841415	2285.79	2697.04
BMEI0954	-	2-AMINO-4-HYDROXY-6-HYDROXYMETHYLDIHYDROPTERIDINE PYROPHOSPHOKINASE	0.991002	-0.01304	0.0551691	932.209	923.821
BMEI0955	-	DIHYDRONEOPTERIN ALDOLASE	0.951874	-0.0711568	0.0568499	948.848	903.184
BMEI0956	-	DIHYDROPTEROATE SYNTHASE	1.05388	0.0757046	0.0289742	590.809	622.64
BMEI0957	-	hypothetical protein BMEI0957	1.60251	0.680337	0.663153	1119.07	1793.33
BMEI0958	-	THIOREDOXIN REDUCTASE	1.33878	0.420918	0.206633	1426.81	1910.18
BMEI0959	-	FERREDOXIN, 2FE-2S	0.341267	-1.55103	0.999999	2918.57	996.013
BMEI0960	-	hypothetical protein BMEI0960	2.1324	1.09248	0.993967	3540.76	7550.33
BMEI0961	-	Kinesin-like protein	0.891805	-0.165201	0.0225707	7499.47	6688.06
BMEI0962	-	membrane lipoprotein lipid attachment site containing protein	1.03842	0.0543873	0.0689357	1312.46	1362.88
BMEI0963	-	TOLUENE TOLERANCE PROTEIN TTG2C	1.23302	0.302196	0.0920251	2717.85	3351.17
BMEI0964	-	ABC TRANSPORTER ATP-BINDING PROTEIN	1.04638	0.0654011	0.0476381	3172.98	3320.13
BMEI0965	-	TOLUENE TOLERANCE PROTEIN TTG2B	1.11711	0.159769	0.0757222	1925.22	2150.68
BMEI0966	-	MUCONATE CYCLOISOMERASE I	1.16881	0.225036	0.0922373	1140.11	1332.57
BMEI0967	-	malic enzyme	0.94008	-0.0891448	0.0675029	2079.66	1955.04
BMEI0968	gltX	glutamyl-tRNA synthetase	0.905355	-0.143445	0.0686174	1075.46	973.669
BMEI0969	nadE	NAD synthetase	1.04593	0.0647908	0.0697693	1607.33	1681.16
BMEI0970	-	DIACYLGLYCEROL KINASE	1.06407	0.0895871	0.0593016	919.069	977.95
BMEI0971	-	PHOSPHO-2-DEHYDRO-3-DEOXYHEPTONATE ALDOLASE	0.520936	-0.940821	0.941818	7925.43	4128.65
BMEI0972	-	glutathione reductase	0.463496	-1.10937	0.997577	3401.97	1576.8
BMEI0973	-	hypothetical protein BMEI0973	0.60957	-0.714136	0.462218	8681.55	5292.01
BMEI0974	-	ribose-5-phosphate isomerase A	0.942645	-0.0852138	0.0466334	3499.19	3298.49
BMEI0975	-	phosphoglycolate phosphatase	0.800859	-0.32038	0.126112	2241.43	1795.07
BMEI0976	-	hypothetical protein BMEI0976	0.933486	-0.0993	0.05241	865.771	808.185
BMEI0977	-	putative sugar kinase	1.03167	0.0449856	0.0628301	1059.81	1093.38
BMEI0978	-	NITROGEN REGULATORY PROTEIN P-II	0.892901	-0.163428	0.0687217	2619.76	2339.19
BMEI0979	-	GLUTAMINE SYNTHETASE	0.707374	-0.499454	0.146966	6406.78	4531.99
BMEI0980	-	hypothetical protein BMEI0980	0.80363	-0.315397	0.118277	1209.3	971.831
BMEI0981	-	PHOSPHOGLYCOLATE PHOSPHATASE	1.13785	0.186312	0.0819923	1113.35	1266.82
BMEI0982	-	TRANSPORTER, DME FAMILY	0.996867	-0.00452722	0.0625204	1093.12	1089.7
BMEI0983	-	RIBOSOMAL LARGE SUBUNIT PSEUDOURIDINE SYNTHASE C	0.904101	-0.145444	0.0738254	1205.55	1089.94
BMEI0984	-	BETA-(1-->2)GLUCAN EXPORT ATP-BINDING PROTEIN NDVA	0.349401	-1.51705	0.999998	3850.37	1345.32
BMEI0985	-	PHNP PROTEIN	0.998652	-0.00194663	0.0628386	1101.93	1100.44
BMEI0986	-	SEC-INDEPENDENT PROTEIN TATD	0.777174	-0.363691	0.14369	2587.19	2010.69
BMEI0987	metG	methionyl-tRNA synthetase	0.870596	-0.199925	0.0889159	1551.99	1351.16
BMEI0988	-	DNA polymerase III subunit delta'	0.737465	-0.439353	0.148888	901.288	664.669
BMEI0989	-	THYMIDYLATE KINASE	0.901932	-0.148909	0.0689947	1070.28	965.319
BMEI0990	-	D-ALANYL-D-ALANINE CARBOXYPEPTIDASE	0.897837	-0.155475	0.0715611	2369.69	2127.59
BMEI0991	-	RARE LIPOPROTEIN A	1.01369	0.0196161	0.0190852	6890.65	6984.98
BMEI0992	-	ARSENATE REDUCTASE	1.66892	0.738914	0.460468	6365.6	10623.7
BMEI0993	-	hypothetical protein BMEI0993	0.94786	-0.0772533	0.0689761	1877.75	1779.84
BMEI0994	-	hypothetical protein BMEI0994	1.02915	0.0414485	0.0612337	1023.76	1053.6
BMEI0995	-	SECRETION ACTIVATOR PROTEIN	1.0606	0.0848806	0.0523898	823.6	873.51
BMEI0996	-	hypothetical protein BMEI0996	1.32646	0.407577	0.0568019	6468.92	8580.74
BMEI0997	-	MANNOSYLTRANSFERASE	1.08416	0.116578	0.0112985	10213.5	11073.1
BMEI0998	-	GLYCOSYLTRANSFERASE	1.13754	0.18592	0.0144662	9378.67	10668.6
BMEI0999	-	hypothetical protein BMEI0999	1.04553	0.0642353	0.0602412	972.988	1017.29
BMEI1000	-	hypothetical protein BMEI1000	1.03737	0.0529241	0.0578393	940.725	975.876
BMEI1001	-	TRANSPOSASE	1.23698	0.306823	0.0945482	2685.06	3321.37
BMEI1002	-	TRANSPOSASE	1.24065	0.311095	0.113989	2074.11	2573.24
BMEI1003	-	QUEUINE TRNA-RIBOSYLTRANSFERASE	1.04328	0.0611253	0.0583102	940.072	980.757
BMEI1004	-	hypothetical protein BMEI1004	0.730023	-0.453987	0.218333	2790.87	2037.4
BMEI1005	-	hypothetical protein BMEI1005	0.973401	-0.0388942	0.050897	2980.37	2901.09
BMEI1006	-	Hypothetical Cytosolic Protein	1.26906	0.34376	0.136588	1864.67	2366.38
BMEI1007	-	25 KDA OUTER-MEMBRANE IMMUNOGENIC PROTEIN PRECURSOR	0.882575	-0.180209	0.00106083	51196.1	45184.4
BMEI1008	-	hypothetical protein BMEI1008	0.940662	-0.0882514	0.0716934	1445.1	1359.35
BMEI1009	-	hypothetical protein BMEI1009	0.93973	-0.0896811	0.035076	678.586	637.688
BMEI1010	-	hypothetical protein BMEI1010	1.37749	0.462037	0.244626	1059.17	1458.99
BMEI1012	-	INTEGRASE/RECOMBINASE	1.25767	0.330751	0.0560243	4930.06	6200.38
BMEI1013	-	Hypothetical Membrane Spanning Protein	1.26547	0.339678	0.142788	1498.13	1895.85
BMEI1014	-	cell wall degradation protein	0.885797	-0.174952	0.0632016	927.513	821.588
BMEI1015	-	hypothetical protein BMEI1015	0.581487	-0.782181	0.826797	3567.92	2074.7
BMEI1016	-	FUMARATE HYDRATASE CLASS I, AEROBIC	0.536118	-0.899377	0.957234	1986.22	1064.85
BMEI1017	-	SALICYLATE HYDROXYLASE	0.889065	-0.169639	0.0323359	632.028	561.914
BMEI1018	-	PHOSPHORIBOSYLFORMIMINO-5-AMINOIMIDAZOLE CARBOXAMIDE RIBOTIDE ISOMERASE	0.957206	-0.0630986	0.0356828	687.454	658.035
BMEI1019	moaA	molybdenum cofactor biosynthesis protein A	0.241928	-2.04735	1	16784.5	4060.63
BMEI1020	-	MOLYBDOPTERIN-GUANINE DINUCLEOTIDE BIOSYNTHESIS PROTEIN A	0.688857	-0.537723	0.231737	5188.27	3573.97
BMEI1021	-	MOLYBDOPTERIN-GUANINE DINUCLEOTIDE BIOSYNTHESIS PROTEIN B	0.611111	-0.710494	0.708121	3006.87	1837.53
BMEI1022	-	ARGININE/ORNITHINE-BINDING PERIPLASMIC PROTEIN PRECURSOR	1.41962	0.505503	0.217741	3098.81	4399.13
BMEI1023	-	GLUTATHIONE S-TRANSFERASE III	1.21879	0.285451	0.101838	2144.02	2613.11
BMEI1024	-	3-HYDROXYISOBUTYRATE DEHYDROGENASE	1.02391	0.0340863	0.0672677	1758.91	1800.96
BMEI1025	-	OUTER MEMBRANE PROTEIN E	1.19901	0.261843	0.0916671	908.943	1089.83
BMEI1026	-	OUTER MEMBRANE PROTEIN E	1.24549	0.316716	0.0997297	2632.84	3279.18
BMEI1027	valS	valyl-tRNA synthetase	0.935182	-0.0966805	0.0695469	1977.87	1849.67
BMEI1028	-	hypothetical protein BMEI1028	1.22351	0.291024	0.117473	1550.1	1896.56
BMEI1029	-	OUTER MEMBRANE PROTEIN TOLC	0.76882	-0.379281	0.0628342	6976.1	5363.37
BMEI1030	-	PROTEIN-L-ISOASPARTATE O-METHYLTRANSFERASE	0.908668	-0.138175	0.0519005	3472.75	3155.58
BMEI1031	-	hypothetical protein BMEI1031	0.949255	-0.0751321	0.0213298	6750.25	6407.71
BMEI1032	-	Heavy Metal Binding Protein	0.66448	-0.589702	0.437977	2917.9	1938.88
BMEI1033	-	hypothetical protein BMEI1033	0.936665	-0.0943949	0.0141612	9234.92	8650.02
BMEI1034	-	HESB PROTEIN	0.632015	-0.661969	0.175913	15396	9730.52
BMEI1035	-	ATP-DEPENDENT RNA HELICASE DEAD	1.14923	0.200664	0.0750468	2323.49	2670.22
BMEI1036	ppnK	inorganic polyphosphate/ATP-NAD kinase	1.19283	0.254391	0.0957128	1976.22	2357.3
BMEI1037	-	Glycosyltransferase involved in cell wall biogenesis	1.57306	0.653574	0.18367	8950.83	14080.2
BMEI1038	-	PHENYLACETIC ACID DEGRADATION PROTEIN PAAD	0.459845	-1.12078	0.998039	3017.31	1387.5
BMEI1039	-	CYSTEINE DESULFHYDRASE / SELENOCYSTEINE LYASE	1.0666	0.0930148	0.068507	1128.29	1203.43
BMEI1040	-	ABC TRANSPORTER ATP-BINDING PROTEIN	0.922983	-0.115624	0.0361304	4700.68	4338.65
BMEI1041	-	ABC TRANSPORTER ATP-BINDING PROTEIN	0.951665	-0.0714743	0.0168282	7975.92	7590.4
BMEI1042	-	cysteine desulfurase activator complex subunit SufB	0.626621	-0.674335	0.358134	8742.86	5478.46
BMEI1043	-	NIFS PROTEIN	1.0361	0.0511676	0.0388384	695.046	720.14
BMEI1044	-	ALPHA/BETA HYDROLASE	0.345588	-1.53288	0.999997	10942.9	3781.73
BMEI1045	-	QUATERNARY AMMONIUM COMPOUND-RESISTANCE PROTEIN QACE	0.515456	-0.956079	0.96916	5283.09	2723.2
BMEI1046	anmK	anhydro-N-acetylmuramic acid kinase	0.968173	-0.0466631	0.0679164	1789.21	1732.26
BMEI1047	-	tyrosyl-tRNA synthetase	0.76696	-0.382777	0.160831	2466.34	1891.58
BMEI1048	-	Hypothetical Membrane Associated Protein	0.98131	-0.0272196	0.0681223	1666.52	1635.37
BMEI1049	-	BACTERIOFERRITIN COMIGRATORY PROTEIN	0.625827	-0.676163	0.654756	2317.16	1450.14
BMEI1050	-	hypothetical protein BMEI1050	0.753292	-0.40872	0.182904	1320.03	994.37
BMEI1051	-	hypothetical protein BMEI1051	1.10879	0.148992	0.0782215	1262.26	1399.58
BMEI1052	-	TRANSPOSASE	1.20574	0.269914	0.0835637	2655.57	3201.92
BMEI1053	-	TRANSPOSASE	1.24684	0.318275	0.119612	1992.65	2484.51
BMEI1054	-	peptide chain release factor 2	0.951953	-0.0710378	0.0544815	2853.77	2716.65
BMEI1055	-	PENICILLIN-BINDING PROTEIN 1A	1.01936	0.0276685	0.0257306	5495.04	5601.44
BMEI1056	-	N-ACETYLMURAMOYL-L-ALANINE AMIDASE	0.874244	-0.193893	0.0807286	2261.02	1976.68
BMEI1057	-	RIBONUCLEASE E / ZINC METALLOPROTEASE	0.631671	-0.662754	0.620164	2500.48	1579.48
BMEI1058	-	ASPARTATE AMINOTRANSFERASE	0.823302	-0.280506	0.114114	1594.52	1312.77
BMEI1059	-	ZINC METALLOPROTEASE	0.849021	-0.236129	0.0986095	1595.04	1354.22
BMEI1060	-	OUTER MEMBRANE PROTEIN	0.771863	-0.373583	0.0930457	4818.08	3718.9
BMEI1061	-	3-dehydroquinate dehydratase	0.507878	-0.977447	0.848673	23502.9	11936.6
BMEI1062	-	acetyl-CoA carboxylase biotin carboxyl carrier protein subunit	0.391612	-1.3525	0.999945	6397.95	2505.51
BMEI1063	-	acetyl-CoA carboxylase biotin carboxylase subunit	0.503574	-0.989725	0.972897	7297.73	3674.94
BMEI1064	aat	leucyl/phenylalanyl-tRNA--protein transferase	0.902941	-0.147296	0.0486281	790.025	713.346
BMEI1065	-	RETROVIRUS-RELATED POL POLYPROTEIN	0.63676	-0.651178	0.408935	6167.14	3926.99
BMEI1066	-	NADH dehydrogenase	1.09385	0.129421	0.030115	5130.52	5612.05
BMEI1067	-	ACETYLTRANSFERASE	0.800057	-0.321825	0.133676	1694.3	1355.54
BMEI1068	gatB	aspartyl/glutamyl-tRNA amidotransferase subunit B	0.689488	-0.536403	0.356317	2362.36	1628.82
BMEI1069	tig	trigger factor	0.562586	-0.829854	0.438704	22841.6	12850.4
BMEI1070	-	hypothetical protein BMEI1070	0.91413	-0.129529	0.0473056	787.551	719.924
BMEI1071	-	Hypothetical Membrane Spanning Protein	1.2525	0.324807	0.0939588	2946.57	3690.57
BMEI1072	-	hypothetical protein BMEI1072	0.164194	-2.60652	1	56849.5	9334.37
BMEI1073	-	tRNA (uracil-5-)-methyltransferase Gid	0.994375	-0.00813735	0.0666694	1265.45	1258.33
BMEI1074	-	PHYTOENE SYNTHASE	0.820286	-0.285801	0.0989381	1089.39	893.61
BMEI1075	-	Hypothetical Cytosolic Protein	0.840998	-0.249825	0.0761379	935.559	786.803
BMEI1076	-	PROTEIN TRANSLOCASE SUBUNIT SECD / PROTEIN TRANSLOCASE SUBUNIT SECF	0.766905	-0.382881	0.127143	3612.81	2770.68
BMEI1077	-	hypothetical protein BMEI1077	0.556109	-0.846561	0.826451	7734.17	4301.04
BMEI1078	-	ATP-DEPENDENT PROTEASE SUBUNIT	0.806823	-0.309676	0.126915	1575.17	1270.88
BMEI1079	-	LIPOPROTEIN NLPD	1.51057	0.595096	0.122135	8803.26	13298
BMEI1080	pcm	protein-L-isoaspartate O-methyltransferase	0.84267	-0.24696	0.0948918	1229.77	1036.29
BMEI1081	surE	stationary phase survival protein SurE	0.937177	-0.0936069	0.0600886	2601.76	2438.31
BMEI1082	-	seryl-tRNA synthetase	0.633122	-0.659445	0.556929	3713.28	2350.96
BMEI1083	-	SEC-INDEPENDENT PROTEIN TRANSLOCASE PROTEIN TATC	0.636417	-0.651956	0.412639	6128.18	3900.08
BMEI1084	tatA	twin argininte translocase protein A	0.414824	-1.26943	0.998705	22190.7	9205.24
BMEI1085	-	Hypothetical Cytosolic Protein	0.861046	-0.215838	0.0882396	1268.63	1092.35
BMEI1086	-	Hypothetical Cytosolic Protein	1.13768	0.186092	0.0830346	1152.06	1310.68
BMEI1087	-	BETA-HEXOSAMINIDASE A	1.39029	0.475391	0.270356	1288.93	1791.99
BMEI1088	-	SOLUBLE LYTIC MUREIN TRANSGLYCOSYLASE	2.13973	1.09743	0.980745	8772.82	18771.5
BMEI1089	argS	arginyl-tRNA synthetase	1.00034	0.000491491	0.0658026	1867.98	1868.62
BMEI1090	-	deoxyguanosinetriphosphate triphosphohydrolase-like protein	1.02098	0.0299495	0.0665045	1218.05	1243.6
BMEI1091	-	HESB PROTEIN	0.417949	-1.2586	0.999777	2180.43	911.309
BMEI1092	-	hypothetical protein BMEI1092	0.196401	-2.34812	1	7664.7	1505.36
BMEI1093	-	EXODEOXYRIBONUCLEASE III	1.03643	0.0516175	0.0576047	937.845	972.007
BMEI1094	-	EXOPOLYSACCHARIDE PRODUCTION NEGATIVE REGULATOR PRECURSOR	0.682881	-0.550294	0.263287	4893.21	3341.48
BMEI1095	-	hypothetical protein BMEI1095	0.74164	-0.431209	0.162493	995.189	738.072
BMEI1096	-	SUCCINOGLYCAN BIOSYNTHESIS PROTEIN EXOI	0.895023	-0.160004	0.0579113	881.581	789.035
BMEI1097	-	Uracil-DNA glycosylase	0.495451	-1.01319	0.984459	1265.02	626.753
BMEI1098	-	TRANSCRIPTIONAL REGULATORY PROTEIN, ASNC FAMILY	1.27968	0.355783	0.152517	1208.96	1547.08
BMEI1099	cobT	nicotinate-nucleotide--dimethylbenzimidazole phosphoribosyltransferase	0.862233	-0.21385	0.084876	1186.79	1023.29
BMEI1100	cobS	cobalamin synthase	1.28569	0.362546	0.15099	1052.4	1353.06
BMEI1101	-	hypothetical protein BMEI1101	0.416089	-1.26504	0.999815	3334.51	1387.45
BMEI1102	-	TRANSPORTER	0.404569	-1.30554	0.99991	3113.69	1259.7
BMEI1103	-	tRNA-dihydrouridine synthase A	1.37647	0.460975	0.24969	1487.45	2047.43
BMEI1104	-	ARGININE/ORNITHINE-BINDING PERIPLASMIC PROTEIN PRECURSOR	1.10444	0.143313	0.0753726	1792.98	1980.23
BMEI1105	-	GLYCEROL-3-PHOSPHATASE 1	0.974831	-0.0367761	0.0617462	1068.57	1041.67
BMEI1106	-	PHNM PROTEIN	0.933077	-0.0999323	0.0508788	845.696	789.099
BMEI1107	-	Hypothetical Cytosolic Protein	0.807688	-0.308131	0.111371	1149.18	928.175
BMEI1108	-	2-DEHYDRO-3-DEOXYGLUCONOKINASE	0.759547	-0.396789	0.129562	936.988	711.687
BMEI1109	-	ALDOSE 1-EPIMERASE	1.04757	0.0670498	0.0682741	1210.75	1268.35
BMEI1110	-	SECRETION ACTIVATOR PROTEIN	1.21151	0.276803	0.108588	1110.22	1345.04
BMEI1111	-	acyl carrier protein	0.992901	-0.0102785	0.0169369	7574.43	7520.66
BMEI1112	-	3-oxoacyl-(acyl carrier protein) synthase II	0.888747	-0.170156	0.0736586	2397.03	2130.35
BMEI1113	-	3-oxoacyl-(acyl carrier protein) synthase II	0.815175	-0.294818	0.119283	1886.14	1537.53
BMEI1114	-	ALCOHOL DEHYDROGENASE	0.872478	-0.19681	0.0877153	1771.23	1545.36
BMEI1115	-	lipid A biosynthesis lauroyl acyltransferase	0.895056	-0.15995	0.0773211	1258.59	1126.51
BMEI1116	-	RIBULOSE-PHOSPHATE 3-EPIMERASE	0.918115	-0.123254	0.075591	1555.53	1428.16
BMEI1117	-	adenylosuccinate lyase	0.667104	-0.584015	0.453444	1706.3	1138.28
BMEI1118	-	BIPHENYL-2,3-DIOL 1,2-DIOXYGENASE III	0.452551	-1.14385	0.998622	3163.88	1431.82
BMEI1119	-	Hypothetical Cytosolic Protein	0.207181	-2.27104	1	4604.35	953.933
BMEI1120	-	phosphotyrosyl phosphatase activator (PTPA)	0.380021	-1.39585	0.999974	7114.48	2703.65
BMEI1121	-	Hypothetical Cytosolic Protein	0.281672	-1.82791	1	6758.66	1903.73
BMEI1122	-	phosphoribosylaminoimidazole-succinocarboxamide synthase	1.21492	0.280862	0.0749496	3153.37	3831.1
BMEI1123	-	phosphoribosylformylglycinamidine synthase subunit PurS	0.970912	-0.042587	0.0437478	3541.18	3438.17
BMEI1124	-	phosphoribosylformylglycinamidine synthase subunit I	1.15039	0.202118	0.0617408	3010.1	3462.78
BMEI1125	-	MALEYLPYRUVATE ISOMERASE	0.574641	-0.799267	0.812464	5050.04	2901.96
BMEI1126	-	Hypothetical Cytosolic Protein	0.694184	-0.526609	0.309369	3063.69	2126.76
BMEI1127	-	phosphoribosylformylglycinamidine synthase II	0.941782	-0.0865354	0.0552871	2877.58	2710.05
BMEI1128	-	BOLA PROTEIN FAMILY	0.613733	-0.704317	0.716774	2071.02	1271.06
BMEI1129	-	GLUTAREDOXIN	0.428367	-1.22308	0.993197	37002.3	15850.6
BMEI1130	-	BICYCLOMYCIN RESISTANCE PROTEIN	0.637511	-0.649479	0.598636	1909.96	1217.62
BMEI1131	-	Inositol monophosphatase and related sulfite synthesis enzyme	1.03093	0.043941	0.0381356	691.44	712.824
BMEI1132	-	ATPase of the PP superfamily	1.05779	0.0810529	0.0698674	1242.34	1314.13
BMEI1133	rpsD	30S ribosomal protein S4	0.891184	-0.166205	0.0243172	7116.1	6341.75
BMEI1134	-	EXTENSIN-LIKE PROTEIN	2.79434	1.48251	0.999996	751.176	2099.05
BMEI1135	-	hypothetical protein BMEI1135	0.990125	-0.0143179	0.0570723	2502.93	2478.22
BMEI1136	-	Hypothetical Cytosolic Protein	1.10158	0.139577	0.0770039	1603	1765.84
BMEI1137	dnaE	DNA polymerase III subunit alpha	1.18503	0.244925	0.10065	1260.86	1494.16
BMEI1138	-	LIPOPROTEIN RELEASING SYSTEM ATP-BINDING PROTEIN LOLD	0.840617	-0.250479	0.100898	1396.12	1173.61
BMEI1139	-	LIPOPROTEIN RELEASING SYSTEM TRANSMEMBRANE PROTEIN LOLE	0.785656	-0.34803	0.124555	2926.86	2299.5
BMEI1140	-	prolyl-tRNA synthetase	0.808822	-0.306105	0.0833018	3842.27	3107.71
BMEI1141	-	Hypothetical Membrane Spanning Protein	1.6121	0.688944	0.602496	2617.23	4219.24
BMEI1142	-	LACTOYLGLUTATHIONE LYASE	0.834006	-0.26187	0.107002	1734.2	1446.34
BMEI1143	-	METAL DEPENDENT HYDROLASE	1.30663	0.385854	0.171329	1113.35	1454.73
BMEI1144	-	biotin--protein ligase	0.740151	-0.434108	0.22014	1678.59	1242.41
BMEI1145	-	NADH dehydrogenase subunit N	0.488193	-1.03448	0.986365	7067.34	3450.23
BMEI1146	-	NADH dehydrogenase subunit M	0.502927	-0.991578	0.97856	6024.71	3029.99
BMEI1147	-	NADH dehydrogenase subunit L	0.495502	-1.01304	0.952017	14640.4	7254.36
BMEI1148	-	NADH dehydrogenase subunit K	0.607639	-0.718713	0.515352	7678.7	4665.88
BMEI1149	-	NADH dehydrogenase subunit J	0.401865	-1.31522	0.999589	18286.6	7348.75
BMEI1150	-	NADH dehydrogenase subunit I	0.571617	-0.806878	0.873568	1620.84	926.5
BMEI1151	-	NADH dehydrogenase subunit H	0.558984	-0.839121	0.75523	9993.45	5586.18
BMEI1152	-	NADH dehydrogenase subunit G	0.615546	-0.700062	0.659706	3600.04	2215.99
BMEI1153	-	NADH-QUINONE OXIDOREDUCTASE CHAIN F	0.475024	-1.07393	0.995224	4341.84	2062.48
BMEI1154	-	NADH dehydrogenase subunit E	0.634268	-0.656836	0.552247	3682.77	2335.86
BMEI1155	-	NADH dehydrogenase subunit D	0.703848	-0.506663	0.249976	3672.04	2584.56
BMEI1156	-	NADH dehydrogenase subunit C	0.686622	-0.542411	0.266442	4527.64	3108.78
BMEI1157	-	NADH dehydrogenase subunit B	0.810518	-0.303084	0.0714195	4443.07	3601.19
BMEI1158	-	NADH dehydrogenase subunit A	0.791291	-0.33772	0.0495512	7037.1	5568.4
BMEI1159	-	hypothetical protein BMEI1159	0.831036	-0.267017	0.103789	1302.27	1082.24
BMEI1160	-	hypothetical protein BMEI1160	0.955001	-0.0664263	0.0618675	2343.39	2237.94
BMEI1161	-	hypothetical protein BMEI1161	0.881755	-0.18155	0.0733805	2539.97	2239.63
BMEI1162	-	hypothetical protein BMEI1162	1.0256	0.0364654	0.0337544	651.452	668.127
BMEI1163	-	TRANSPOSASE	1.22345	0.290959	0.0893831	2676.12	3274.11
BMEI1164	-	TRANSPOSASE	1.29096	0.368442	0.148445	1962	2532.85
BMEI1165	-	Hypothetical Membrane Spanning Protein	0.740436	-0.433553	0.216091	2134.2	1580.24
BMEI1166	-	O-acetylhomoserine aminocarboxypropyltransferase	0.709988	-0.494134	0.270086	2805.02	1991.53
BMEI1167	-	hypothetical protein BMEI1167	0.903337	-0.146664	0.059142	913.032	824.775
BMEI1168	rplM	50S ribosomal protein L13	0.44316	-1.1741	0.994294	19390.8	8593.25
BMEI1169	rpsI	30S ribosomal protein S9	0.371284	-1.42941	0.999987	6979.2	2591.26
BMEI1170	-	AGMATINASE	0.863621	-0.21153	0.0839941	1177.6	1017
BMEI1171	argC	N-acetyl-gamma-glutamyl-phosphate reductase	0.715597	-0.482781	0.274422	1533.64	1097.47
BMEI1172	-	CYTOCHROME C OXIDASE ASSEMBLY PROTEIN COX15	0.860138	-0.21736	0.093092	1729.17	1487.33
BMEI1173	-	Hypothetical Membrane Spanning Protein	0.939923	-0.089386	0.070944	1348.7	1267.68
BMEI1174	-	ATPase, ParA FAMILY	1.10808	0.148062	0.0679622	948.978	1051.54
BMEI1175	-	PUTATIVE CAPSULE POLYSACCHARIDE EXPORT PROTEIN PRECURSOR	3.89061	1.96	1	1860.3	7237.7
BMEI1176	-	hypothetical protein BMEI1176	2.21182	1.14523	0.998675	1237.43	2736.97
BMEI1177	-	PUTATIVE COLANIC BIOSYNTHESIS UDP-GLUCOSE LIPID CARRIER TRANSFERASE	0.866303	-0.207056	0.0788117	1089.08	943.472
BMEI1178	-	TRANSCRIPTIONAL REGULATOR, MERR FAMILY	1.19436	0.256235	0.0110698	12626.9	15081
BMEI1179	ihfA	integration host factor subunit alpha	1.18906	0.24982	0.100035	1694.08	2014.37
BMEI1180	-	3-oxoacyl-(acyl carrier protein) synthase III	0.780788	-0.356998	0.149853	2150.91	1679.4
BMEI1181	-	fatty acid/phospholipid synthesis protein	0.702374	-0.509689	0.196753	5107.08	3587.08
BMEI1182	-	Hypothetical Cytosolic Protein	0.586739	-0.769209	0.83251	2085.94	1223.9
BMEI1183	-	hypothetical protein BMEI1183	0.867997	-0.204238	0.0898012	1525.47	1324.1
BMEI1184	-	SMALL PROTEIN A	0.883627	-0.178491	0.0379453	5158.78	4558.43
BMEI1185	hppA	membrane-bound proton-translocating pyrophosphatase	1.23479	0.304266	0.00371588	27154.5	33530.1
BMEI1186	nusB	transcription antitermination protein NusB	0.615667	-0.699778	0.516817	6498.09	4000.66
BMEI1187	ribH	riboflavin synthase subunit beta	0.479982	-1.05895	0.993897	4451.03	2136.42
BMEI1188	-	riboflavin synthase subunit alpha	0.265865	-1.91123	1	15752.4	4188
BMEI1189	-	DIAMINOHYDROXYPHOSPHORIBOSYLAMINOPYRIMIDINE DEAMINASE / 5-AMINO-6-(5-PHOSPHORIBOSYLAMINO)URACIL REDUCTASE	0.89391	-0.161798	0.0807517	1450.66	1296.76
BMEI1190	-	hypothetical protein BMEI1190	0.92605	-0.110838	0.0643519	1049.89	972.255
BMEI1191	-	SERINE HYDROXYMETHYLTRANSFERASE	0.915785	-0.126919	0.0709937	1183.86	1084.16
BMEI1191	-	SERINE HYDROXYMETHYLTRANSFERASE	0.915785	-0.126919	0.0709937	1183.86	1084.16
BMEI1191	-	SERINE HYDROXYMETHYLTRANSFERASE	0.915785	-0.126919	0.0709937	1183.86	1084.16
BMEI1191	-	SERINE HYDROXYMETHYLTRANSFERASE	0.915785	-0.126919	0.0709937	1183.86	1084.16
BMEI1193	-	cell wall degradation protein	0.84664	-0.240179	0.0346627	6579.72	5570.66
BMEI1194	-	EXOPOLYSACCHARIDE SYNTHESIS REGULATORY PROTEIN MUCS	1.0253	0.0360422	0.0300682	4845.08	4967.65
BMEI1195	-	Hypothetical Membrane Spanning Protein	0.810218	-0.303618	0.124332	1761.52	1427.22
BMEI1196	-	enoyl-CoA hydratase	0.6452	-0.632183	0.476421	3988.51	2573.39
BMEI1197	-	delta-aminolevulinic acid dehydratase	0.732064	-0.449958	0.236886	1635.36	1197.19
BMEI1198	-	Hypothetical Membrane Spanning Protein	0.425476	-1.23285	0.998359	16758.2	7130.21
BMEI1199	-	arginyl-tRNA-protein transferase	0.441903	-1.1782	0.999066	4552.65	2011.83
BMEI1200	-	DNA topoisomerase IV subunit A	0.880361	-0.183833	0.0797842	1209.09	1064.44
BMEI1201	-	Hypothetical Cytosolic Protein	0.599737	-0.737598	0.450546	10811.5	6484.04
BMEI1202	aspS	aspartyl-tRNA synthetase	1.02461	0.0350762	0.0645243	1989.55	2038.52
BMEI1203	-	RIBONUCLEASE D	0.814324	-0.296325	0.108256	2528.91	2059.35
BMEI1204	-	EXOPOLYPHOSPHATASE	0.847916	-0.238007	0.095399	1320.14	1119.37
BMEI1205	-	polyphosphate kinase	0.912813	-0.131609	0.0712547	2157.08	1969.01
BMEI1206	-	Hypothetical Cytosolic Protein	0.951561	-0.0716326	0.0414011	3870.32	3682.85
BMEI1207	-	salicylate hydroxylase	1.02403	0.0342612	0.0650499	1146.1	1173.64
BMEI1208	-	GENERAL L-AMINO ACID TRANSPORT ATP-BINDING PROTEIN AAPP	0.941719	-0.0866321	0.0620688	2433.26	2291.45
BMEI1209	-	GENERAL L-AMINO ACID TRANSPORT SYSTEM PERMEASE PROTEIN AAPM	0.966468	-0.0492062	0.0586871	993.936	960.608
BMEI1210	-	GENERAL L-AMINO ACID TRANSPORT SYSTEM PERMEASE PROTEIN AAPQ	0.915632	-0.127161	0.0664184	2432.6	2227.37
BMEI1211	-	GENERAL L-AMINO ACID-BINDING PERIPLASMIC PROTEIN AAPJ PRECURSOR	1.01864	0.0266477	0.0273367	5236.64	5334.26
BMEI1212	-	PHOSPHATIDYLGLYCEROPHOSPHATASE B	0.584488	-0.774756	0.812305	3636.85	2125.69
BMEI1213	-	cystathionine beta-lyase	0.740379	-0.433665	0.156482	3927.63	2907.93
BMEI1214	-	hypothetical protein BMEI1214	1.61588	0.692324	0.489788	4119.52	6656.67
BMEI1215	-	Hypothetical Membrane Spanning Protein	2.30005	1.20166	0.998687	4157.05	9561.41
BMEI1216	-	Hypothetical Cytosolic Protein	1.30202	0.380751	0.161722	1824.48	2375.51
BMEI1217	-	ApeA	0.994685	-0.0076889	0.0564541	954.253	949.18
BMEI1218	-	similar to phage protein	0.874843	-0.192904	0.0870677	1498.17	1310.66
BMEI1219	-	hypothetical protein BMEI1219	1.53288	0.616242	0.508729	1730.19	2652.16
BMEI1220	-	hypothetical protein BMEI1220	1.65741	0.728928	0.728772	2105.6	3489.84
BMEI1221	-	Hypothetical Cytosolic Protein	1.00223	0.0032182	0.0311756	636.835	638.258
BMEI1222	-	hypothetical protein BMEI1222	0.963437	-0.0537379	0.0291744	624.847	602
BMEI1223	-	TRANSPOSASE	1.2321	0.301124	0.0919351	778.493	959.185
BMEI1224	-	hypothetical protein BMEI1224	0.999266	-0.00105911	0.0461113	797.915	797.33
BMEI1225	-	hypothetical protein BMEI1225	1.07477	0.104032	0.0575133	869.969	935.019
BMEI1226	-	TRANSCRIPTIONAL REGULATOR	0.951112	-0.0723133	0.0653619	2133.45	2029.15
BMEI1227	-	hypothetical protein BMEI1227	1.08692	0.120249	0.0543683	2903.6	3155.99
BMEI1228	-	ADENYLATE KINASE	0.973638	-0.0385428	0.0688378	1596.75	1554.65
BMEI1229	-	Hypothetical exonuclease	0.863695	-0.211406	0.0892601	1972.38	1703.53
BMEI1230	-	Hypothetical Cytosolic Protein	0.828501	-0.271425	0.100984	2396.92	1985.85
BMEI1231	-	NADH-UBIQUINONE OXIDOREDUCTASE 18 KD SUBUNIT	0.544711	-0.876437	0.940456	3209.64	1748.33
BMEI1233	-	L-LACTATE PERMEASE	1.07468	0.103907	0.0328258	609.443	654.957
BMEI1234	-	Hypothetical Membrane Associated Protein	1.11964	0.163032	0.081472	1382.1	1547.46
BMEI1235	-	SHORT-CHAIN DEHYDROGENASE	0.955187	-0.0661451	0.0650264	1137.2	1086.24
BMEI1236	-	Hypothetical exported proline-rich protein	0.617214	-0.696156	0.646061	3695.25	2280.76
BMEI1237	-	UDP-GLUCOSE 4-EPIMERASE	1.03828	0.0542022	0.0625832	1040.02	1079.84
BMEI1238	-	hypothetical protein BMEI1238	1.01169	0.0167638	0.0656615	1195.16	1209.13
BMEI1239	-	PERMEASE	1.19069	0.251796	0.0605345	3557.49	4235.87
BMEI1240	-	phosphoribosylaminoimidazole synthetase	0.983469	-0.0240487	0.0685396	1541.26	1515.79
BMEI1241	purN	phosphoribosylglycinamide formyltransferase	1.03718	0.052671	0.0283521	594.968	617.091
BMEI1242	-	Hypothetical Membrane Spanning Protein	3.36471	1.75048	1	4704.73	15830
BMEI1243	-	FORMATE DEHYDROGENASE ALPHA CHAIN	1.14485	0.19516	0.0700199	857.885	982.151
BMEI1244	-	TRANSPORTER, DME FAMILY	1.19711	0.259552	0.0940692	951.281	1138.79
BMEI1245	-	florfenicol resistance protein	1.20377	0.267558	0.0737921	728.695	877.18
BMEI1246	-	Hypothetical Cytosolic Protein	0.934191	-0.0982109	0.0218584	6827.9	6378.56
BMEI1247	-	RIBONUCLEASE PRECURSOR	0.748334	-0.418247	0.194412	1372.5	1027.09
BMEI1248	-	GLUTATHIONE S-TRANSFERASE	0.731127	-0.451807	0.240088	1934.1	1414.07
BMEI1249	-	25 KDA OUTER-MEMBRANE IMMUNOGENIC PROTEIN PRECURSOR	0.845484	-0.24215	0.000971595	61521.8	52015.7
BMEI1250	-	short chain dehydrogenase	0.585321	-0.772699	0.836829	2377.55	1391.63
BMEI1251	uvrC	excinuclease ABC subunit C	1.12482	0.169699	0.0724114	964.744	1085.17
BMEI1252	-	CDP-DIACYLGLYCEROL--GLYCEROL-3-PHOSPHATE 3-PHOSPHATIDYLTRANSFERASE	1.08884	0.12279	0.0461649	3482.06	3791.4
BMEI1253	-	MOLYBDOPTERIN (MPT) CONVERTING FACTOR, SUBUNIT 1	0.85204	-0.231007	0.0233827	8568.44	7300.66
BMEI1254	-	MOLYBDOPTERIN (MPT) CONVERTING FACTOR, SUBUNIT 2	0.860479	-0.216789	0.086302	2258.81	1943.65
BMEI1255	-	glycoprotein/polysaccharide metabolism	0.777057	-0.363907	0.126229	3212.73	2496.48
BMEI1256	ndk	nucleoside diphosphate kinase	0.693408	-0.528224	0.329422	2683.28	1860.6
BMEI1257	-	DINB PROTEIN	0.978958	-0.0306814	0.0415692	749.256	733.49
BMEI1258	-	ABC TRANSPORTER ATP-BINDING PROTEIN	0.96404	-0.0528358	0.0492815	842.04	811.76
BMEI1259	-	Hypothetical Membrane Spanning Protein	0.71175	-0.490558	0.278092	2468.38	1756.87
BMEI1260	-	DNA polymerase III subunit chi	0.690082	-0.535159	0.173574	6869.77	4740.71
BMEI1261	-	leucyl aminopeptidase	0.420814	-1.24874	0.999629	6464.79	2720.48
BMEI1262	-	Hypothetical Membrane Spanning Protein	1.16809	0.224151	0.0194607	8185.55	9561.46
BMEI1263	-	putative permeases	0.908067	-0.13913	0.0737621	2055.44	1866.47
BMEI1264	-	ORGANIC SOLVENT TOLERANCE PROTEIN	0.775658	-0.366508	0.11351	3746.58	2906.06
BMEI1265	-	SURVIVAL PROTEIN SURA PRECURSOR (PEPTIDYL-PROLYL CIS-TRANS ISOMERASE SURA)	0.58114	-0.783042	0.635254	9190.62	5341.04
BMEI1266	pdxA	4-hydroxythreonine-4-phosphate dehydrogenase	0.607384	-0.71932	0.623535	5326.18	3235.03
BMEI1267	ksgA	dimethyladenosine transferase	0.744709	-0.425251	0.122385	827.64	616.351
BMEI1268	-	LYSOSTAPHIN	0.894607	-0.160674	0.0730352	1126.64	1007.9
BMEI1269	-	CHLORAMPHENICOL-SENSITIVE PROTEIN RARD	0.68834	-0.538807	0.368014	1729.87	1190.74
BMEI1270	-	putative alpha-isopropylmalate/homocitrate synthase family transferase	1.26169	0.335363	0.140453	1246.63	1572.86
BMEI1271	-	2-ISOPROPYLMALATE SYNTHASE	0.77742	-0.363233	0.151801	1361.3	1058.3
BMEI1272	cysS	cysteinyl-tRNA synthetase	1.07292	0.101547	0.0648589	2183.99	2343.26
BMEI1273	-	hypothetical protein BMEI1273	1.12719	0.172737	0.0593196	783.26	882.886
BMEI1274	-	TRANSPORTER, LysE family	1.21875	0.285403	0.00914261	15151.1	18465.4
BMEI1275	-	hypothetical protein BMEI1275	1.25619	0.32906	0.135426	1177.67	1479.38
BMEI1276	-	PHOSPHOHYDROLASE (MUTT/NUDIX FAMILY PROTEIN)	1.32117	0.401815	0.186569	1160.13	1532.73
BMEI1277	-	Hypothetical Cytosolic Protein	0.811277	-0.301733	0.101429	1052.99	854.265
BMEI1278	-	hypothetical protein BMEI1278	0.807156	-0.30908	0.0511594	6122.59	4941.89
BMEI1279	-	Hypothetical Cytosolic Protein	0.822472	-0.281961	0.0424353	6435.95	5293.39
BMEI1280	-	Hypothetical Cytosolic Protein	0.557218	-0.843685	0.918366	2734.58	1523.76
BMEI1281	-	dihydroorotase	1.04392	0.0620163	0.0699469	1539.36	1606.97
BMEI1282	-	AMINOMETHYLTRANSFERASE	0.439048	-1.18755	0.999311	2391.03	1049.78
BMEI1283	-	Hypothetical Cytosolic Protein	0.81357	-0.297662	0.0959952	1009.1	820.971
BMEI1284	-	Hypothetical protein-tyrosine phosphatase	0.868811	-0.202886	0.0800656	1129.08	980.96
BMEI1285	recO	DNA repair protein RecO	1.18238	0.2417	0.0827006	875.541	1035.23
BMEI1286	era	GTP-binding protein Era	1.34845	0.431306	0.209194	1715.46	2313.22
BMEI1287	rncS	ribonuclease III	1.09682	0.133322	0.0752722	1221.25	1339.48
BMEI1288	-	SIGNAL PEPTIDASE I	0.898831	-0.153878	0.0305429	5823.73	5234.55
BMEI1289	acpS	4'-phosphopantetheinyl transferase	0.918063	-0.123335	0.0755026	1631.33	1497.66
BMEI1290	-	Hypothetical Membrane Spanning Protein	0.748606	-0.417721	0.177915	2868.33	2147.25
BMEI1291	-	TRANSCRIPTIONAL REGULATOR, ARAC FAMILY	1.07912	0.109857	0.067797	2045.73	2207.59
BMEI1292	-	FOSMIDOMYCIN RESISTANCE PROTEIN	0.720664	-0.472601	0.261788	1549.59	1116.73
BMEI1293	-	coproporphyrinogen III oxidase	0.163437	-2.6132	1	4301.29	702.988
BMEI1294	-	NITROGEN FIXATION REGULATION PROTEIN FIXK	0.161137	-2.63364	1	11319.7	1824.02
BMEI1295	pyrE	orotate phosphoribosyltransferase	0.759048	-0.397736	0.16531	2719.23	2064.03
BMEI1296	-	GUANOSINE-3',5'-BIS(DIPHOSPHATE) 3'-PYROPHOSPHOHYDROLASE	0.934878	-0.0971506	0.070119	1934.19	1808.23
BMEI1297	-	DNA-directed RNA polymerase subunit omega	0.852085	-0.23093	0.028595	7407.55	6311.87
BMEI1298	-	Hypothetical Cytosolic Protein	0.901925	-0.148921	0.0475309	3906.3	3523.18
BMEI1299	-	Hypothetical Cytosolic Protein	0.908572	-0.138327	0.0225778	558.279	507.237
BMEI1300	smpB	SsrA-binding protein	0.661743	-0.595658	0.481508	1951.58	1291.45
BMEI1301	dapA	dihydrodipicolinate synthase	0.718674	-0.47659	0.242081	2896.68	2081.77
BMEI1302	-	SOLUBLE LYTIC MUREIN TRANSGLYCOSYLASE	0.814938	-0.295237	0.0549554	5464.34	4453.1
BMEI1303	-	Hypothetical Cytosolic Protein	0.756968	-0.401696	0.184367	2158.91	1634.22
BMEI1304	-	OUTER MEMBRANE PORIN F PRECURSOR	0.922464	-0.116435	0.0592144	949.198	875.601
BMEI1305	-	PORIN	0.938718	-0.091237	0.00286359	25064.2	23528.2
BMEI1306	-	PORIN	1.08234	0.114151	0.0435308	698.169	755.655
BMEI1307	-	INTEGRASE	1.09306	0.128366	0.0608928	879.553	961.399
BMEI1308	-	HISTIDINOL-PHOSPHATE AMINOTRANSFERASE	1.06061	0.0848986	0.0609411	2354.25	2496.95
BMEI1310	-	Hypothetical Membrane Spanning Protein	1.18872	0.249414	0.0994724	1134.03	1348.05
BMEI1311	-	hypothetical protein BMEI1311	1.33456	0.41636	0.0329138	9808.73	13090.3
BMEI1312	-	Hypothetical Membrane Spanning Protein	1.03166	0.044974	0.0656626	1151.26	1187.72
BMEI1313	-	Hypothetical Cytosolic Protein	1.63137	0.706084	0.453839	5114.83	8344.18
BMEI1314	-	hypothetical protein BMEI1314	1.0051	0.00733756	0.0396251	720.921	724.597
BMEI1315	-	SN-GLYCEROL-3-PHOSPHATE TRANSPORT ATP-BINDING PROTEIN UGPC	1.19813	0.260789	0.0900038	893.052	1070
BMEI1316	-	GLUTATHIONE S-TRANSFERASE	0.830759	-0.267498	0.102988	2217.23	1841.98
BMEI1317	-	hypothetical protein BMEI1317	3.16724	1.66323	1	4664.78	14774.5
BMEI1318	-	AMP nucleosidase	1.34761	0.430404	0.184075	2254.03	3037.56
BMEI1319	-	Hypothetical Membrane Spanning Protein	0.394211	-1.34296	0.99994	5709.95	2250.93
BMEI1320	-	ELECTRON TRANSFER FLAVOPROTEIN-UBIQUINONE OXIDOREDUCTASE PRECURSOR	0.86518	-0.208928	0.0895822	1398.67	1210.1
BMEI1321	-	DNA POLYMERASE, BACTERIOPHAGE-TYPE	0.566228	-0.820545	0.86538	4347.02	2461.4
BMEI1322	-	TRANSPORTER, MFS superfamily	1.00717	0.0103074	0.0671938	1293.02	1302.29
BMEI1323	-	TRANSPORTER, DME FAMILY	0.98794	-0.0175051	0.0662201	1236.98	1222.06
BMEI1324	-	MEMBRANE ALANINE AMINOPEPTIDASE	0.854991	-0.22602	0.0928336	2002.04	1711.73
BMEI1325	-	Sensory Transduction Protein Kinase	1.71973	0.782181	0.836059	891.46	1533.07
BMEI1326	-	LPSA PROTEIN	1.03384	0.0480089	0.069199	1554.58	1607.19
BMEI1327	-	GLUTAMATE-AMMONIA-LIGASE ADENYLYLTRANSFERASE	0.994737	-0.00761336	0.0532079	898.635	893.905
BMEI1328	-	Sensory Transduction Histidine Kinase	0.633185	-0.659301	0.607811	1586.44	1004.51
BMEI1329	-	TWO COMPONENT RESPONSE REGULATOR	0.650534	-0.620305	0.519316	1531.82	996.497
BMEI1330	-	PROTEASE DO	0.406205	-1.29972	0.999883	4812.32	1954.79
BMEI1331	-	CYTOCHROME C-TYPE BIOGENESIS PROTEIN CYCL PRECURSOR	0.71547	-0.483037	0.232277	1113.91	796.969
BMEI1332	-	CYTOCHROME C-TYPE BIOGENESIS PROTEIN CYCK	0.50194	-0.994414	0.987716	2355.25	1182.19
BMEI1333	-	cytochrome c-type biogenesis protein CcmE	0.405872	-1.3009	0.999889	4560.81	1851.11
BMEI1334	-	CYTOCHROME C-TYPE BIOGENESIS PROTEIN CYCH	0.386765	-1.37047	0.99997	2457.03	950.293
BMEI1335	-	17 KD SURFACE ANTIGEN PRECURSOR	0.976379	-0.0344872	0.0299981	631.594	616.675
BMEI1336	-	SENSOR PROTEIN PHOQ	1.24299	0.313819	0.1249	1104.29	1372.62
BMEI1337	-	TRANSCRIPTIONAL REGULATORY PROTEIN PHOP	1.40581	0.491402	0.290418	1174.09	1650.54
BMEI1338	-	hypothetical protein BMEI1338	1.4349	0.520946	0.29085	2270.54	3257.98
BMEI1339	-	hypothetical protein BMEI1339	1.18547	0.245463	0.0997327	1195.08	1416.74
BMEI1340	-	Phage Host Specificity Protein	1.07033	0.0980566	0.0230172	529.638	566.888
BMEI1341	-	Phage Host Specificity Protein	1.18218	0.241452	0.0573453	660.222	780.502
BMEI1342	-	hypothetical protein BMEI1342	1.10621	0.145625	0.0330289	584.085	646.121
BMEI1343	-	hypothetical protein BMEI1343	1.1422	0.191811	0.0393867	594.411	678.935
BMEI1344	-	hypothetical protein BMEI1344	1.18469	0.244505	0.0425883	565.077	669.439
BMEI1346	-	hypothetical protein BMEI1346	1.301	0.379619	0.164664	1076.86	1400.99
BMEI1347	-	hypothetical protein BMEI1347	1.06555	0.0915983	0.0378765	662.072	705.471
BMEI1348	-	hypothetical protein BMEI1348	1.19189	0.253251	0.0796416	809.631	964.991
BMEI1349	-	Phage Portal Protein	1.11983	0.163275	0.0266736	524.75	587.629
BMEI1350	-	Phage DNA Packaging Protein	1.13577	0.183672	0.042813	626.834	711.94
BMEI1351	-	PENICILLIN-BINDING PROTEIN 1A	0.761561	-0.392968	0.179652	2008.74	1529.78
BMEI1352	-	hypothetical protein BMEI1352	1.05077	0.0714431	0.0549759	873.756	918.115
BMEI1353	-	hypothetical protein BMEI1353	1.01777	0.0254122	0.0291365	611.569	622.437
BMEI1354	-	Hypothetical Cytosolic Protein	1.61194	0.688802	0.374193	5755.43	9277.43
BMEI1355	-	Hypothetical Cytosolic Protein	0.815382	-0.294453	0.120268	1690.88	1378.71
BMEI1356	-	peptidoglycan binding domain containing protein	0.877902	-0.187868	0.0321252	6048.65	5310.12
BMEI1357	-	HISTIDINE PROTEIN KINASE DIVJ	1.19249	0.253975	0.0214307	8143.57	9711.11
BMEI1358	-	Hypothetical Cytosolic Protein	1.25471	0.327358	0.131147	1736.85	2179.24
BMEI1359	-	SufE protein probably involved in Fe-S center assembly	0.701183	-0.512138	0.318758	2235.83	1567.72
BMEI1360	-	amidase	1.0195	0.0278639	0.0302591	621.301	633.417
BMEI1361	-	Hypothetical Cytosolic Protein	1.03491	0.0495049	0.0209118	529.147	547.619
BMEI1362	-	hypothetical protein BMEI1362	1.03781	0.0535393	0.0181973	503.199	522.224
BMEI1363	-	Hypothetical Cytosolic Protein	1.03544	0.0502422	0.0684112	1285.1	1330.64
BMEI1364	-	TRANSCRIPTIONAL REGULATORY PROTEIN MUCR	1.1155	0.157695	0.00448902	18915.4	21100.2
BMEI1365	-	PROTEASE II	0.490794	-1.02681	0.989167	5014.47	2461.07
BMEI1367	-	SUPEROXIDE DISMUTASE (MN)	0.3778	-1.40431	0.999978	6972.38	2634.16
BMEI1368	-	2-HALOALKANOIC ACID DEHALOGENASE I	0.788248	-0.343278	0.0958091	3985.57	3141.62
BMEI1369	-	PROTEIN YBIS PRECURSOR	1.02508	0.0357358	0.00822622	12160.8	12465.8
BMEI1370	-	ATPase	0.9049	-0.14417	0.0783373	1648.64	1491.85
BMEI1371	-	hypothetical protein BMEI1371	0.841552	-0.248876	0.0743314	919.098	773.468
BMEI1372	-	CYANATE TRANSPORT PROTEIN CYNX	1.02262	0.0322702	0.0549537	908.716	929.271
BMEI1373	-	TRANSCRIPTIONAL REGULATOR, GNTR FAMILY	1.12703	0.172532	0.0482318	681.216	767.754
BMEI1374	-	MAGNESIUM AND COBALT TRANSPORT PROTEIN CORA	1.41003	0.495726	0.176129	3711.18	5232.88
BMEI1375	-	hypothetical protein BMEI1375	1.45211	0.538152	0.0870587	8417.7	12223.4
BMEI1376	-	DEATH ON CURING PROTEIN	1.35678	0.440191	0.174732	2628.84	3566.77
BMEI1377	-	TRANSCRIPTION ELONGATION FACTOR GREB	0.357081	-1.48567	0.999997	2960.19	1057.03
BMEI1378	-	L-ASPARAGINASE II	1.08742	0.120912	0.0575031	844.926	918.792
BMEI1379	-	transcriptional regulator BetI	1.92592	0.945548	0.97205	814.939	1569.51
BMEI1380	-	choline dehydrogenase	2.07196	1.05099	0.994302	1029.56	2133.21
BMEI1381	-	CHOLINE DEHYDROGENASE	1.71892	0.781499	0.823612	808.765	1390.2
BMEI1382	-	betaine aldehyde dehydrogenase	1.94462	0.959489	0.980292	1362.55	2649.65
BMEI1383	-	TRANSCRIPTIONAL REGULATOR, ARAC FAMILY	3.21848	1.68638	1	1767.14	5687.51
BMEI1384	-	TRANSCRIPTIONAL REGULATOR, ARAC FAMILY	1.6211	0.696977	0.647104	776.008	1257.99
BMEI1385	-	LACI-FAMILY TRANSCRIPTION REGULATOR	0.949241	-0.0751538	0.0157181	499.14	473.804
BMEI1386	-	XYLULOSE KINASE	0.914081	-0.129606	0.0350292	668.731	611.274
BMEI1387	-	xylose isomerase	0.941641	-0.0867509	0.0702905	1315.22	1238.47
BMEI1388	-	OXIDOREDUCTASE	1.19307	0.254684	0.0994081	1081.57	1290.4
BMEI1389	-	IOLE PROTEIN	1.11722	0.159915	0.0809658	1443.42	1612.62
BMEI1391	-	RIBOSE TRANSPORT SYSTEM PERMEASE PROTEIN RBSC	1.19388	0.255652	0.0922632	943.806	1126.79
BMEI1392	-	RIBOSE TRANSPORT ATP-BINDING PROTEIN RBSA	1.17559	0.233379	0.0819303	894.155	1051.16
BMEI1393	-	MANNOSYLTRANSFERASE C	0.748432	-0.418056	0.149346	3735.49	2795.76
BMEI1394	-	MANNOSE-6-PHOSPHATE ISOMERASE	0.802283	-0.317817	0.0414581	7465.63	5989.55
BMEI1395	-	MANNOSE-1-PHOSPHATE GUANYLYLTRANSFERASE	0.833811	-0.262207	0.0461826	5610.05	4677.72
BMEI1396	-	PHOSPHOMANNOMUTASE	1.10775	0.147627	0.0255718	5956.27	6598.03
BMEI1397	-	TRANSPOSASE	1.16653	0.222222	0.0886378	1058.69	1234.99
BMEI1398	-	TRANSPOSASE	1.3244	0.405344	0.172346	2039.23	2700.76
BMEI1399	-	TRANSPOSASE	1.30789	0.387246	0.158761	929.36	1215.5
BMEI1400	-	TRANSPOSASE	1.17107	0.227828	0.0871706	2030.76	2378.16
BMEI1401	-	TRANSPOSASE	0.899735	-0.152427	0.0536806	840.195	755.953
BMEI1402	-	TRANSPOSASE	0.673277	-0.570728	0.410409	2660.07	1790.96
BMEI1403	-	TRANSPOSASE	0.600165	-0.736568	0.777749	1966.8	1180.41
BMEI1404	-	MANNOSYLTRANSFERASE	1.10553	0.144735	0.0579317	2815.78	3112.92
BMEI1405	-	TRANSPOSASE	1.15745	0.210945	0.0456323	4151.64	4805.3
BMEI1406	-	TRANSPOSASE	1.22266	0.290029	0.0906273	2617.29	3200.07
BMEI1408	-	TRANSPOSASE	1.0569	0.0798329	0.0617271	979.468	1035.2
BMEI1409	-	TRANSPOSASE	1.36788	0.451945	0.239372	1202.65	1645.09
BMEI1410	-	TRANSPOSASE	1.3201	0.400653	0.188021	1410.01	1861.36
BMEI1411	-	TRANSPOSASE	1.3117	0.391438	0.163812	946.419	1241.42
BMEI1412	-	TRANSPOSASE	1.21315	0.278758	0.10194	2049.32	2486.14
BMEI1413	-	GDP-mannose 4,6-dehydratase	0.632115	-0.661742	0.0827344	26222.1	16575.4
BMEI1414	-	PEROSAMINE SYNTHETASE	0.778342	-0.361524	0.0321341	10606.6	8255.57
BMEI1415	-	O-ANTIGEN EXPORT SYSTEM PERMEASE PROTEIN RFBD	0.639744	-0.644433	0.111483	19240.6	12309.1
BMEI1416	-	O-ANTIGEN EXPORT SYSTEM ATP-BINDING PROTEIN RFBB	0.581678	-0.781707	0.756338	5697.04	3313.84
BMEI1417	-	PEROSAMINE SYNTHETASE WBKB	0.51233	-0.964855	0.971849	5444.01	2789.13
BMEI1418	-	GDP-mannose 4,6-dehydratase / GDP-4-amino-4,6-dideoxy-D-mannose formyltransferase	0.552939	-0.854807	0.806218	9294.99	5139.56
BMEI1419	-	hypothetical protein BMEI1419	0.467994	-1.09544	0.996522	4431.24	2073.79
BMEI1420	-	TRANSPOSASE	0.886478	-0.173844	0.0654964	960.277	851.264
BMEI1421	-	TRANSPOSASE	1.12248	0.166686	0.0619955	823.371	924.214
BMEI1422	-	TRANSPOSASE	1.06122	0.0857232	0.0415835	701.622	744.575
BMEI1423	-	TRANSPOSASE	1.64415	0.717341	0.734462	1599.57	2629.94
BMEI1424	-	TRANSPOSASE	1.64922	0.721781	0.708674	799.09	1317.87
BMEI1425	-	hypothetical protein BMEI1425	1.05852	0.0820532	0.0394187	682.898	722.863
BMEI1426	-	PUTATIVE UNDECAPRENYL-PHOSPHATE ALPHA-N-ACETYLGLUCOSAMINYLTRANSFERASE	0.861073	-0.215792	0.0916596	1426.2	1228.06
BMEI1427	-	CAPD PROTEIN	0.95517	-0.066171	0.0659186	1167.05	1114.73
BMEI1428	-	RIBONUCLEASE III	1.16662	0.22234	0.0895989	1082.21	1262.54
BMEI1429	-	TRANSTHYRETIN-LIKE PROTEIN PRECURSOR	0.637368	-0.649802	0.575819	1457.88	929.207
BMEI1430	-	ureidoglycolate hydrolase	0.956355	-0.0643821	0.0670085	1212.98	1160.04
BMEI1431	-	BIOY PROTEIN	0.757796	-0.400119	0.18778	1714.67	1299.37
BMEI1432	-	HYDROXYACYLGLUTATHIONE HYDROLASE	1.0764	0.106214	0.0711775	1182.71	1273.07
BMEI1433	-	hypothetical protein BMEI1433	0.955168	-0.0661733	0.0702721	1583.06	1512.09
BMEI1434	-	hypothetical protein BMEI1434	1.12955	0.175754	0.0280564	5779	6527.69
BMEI1435	-	POLYSACCHARIDE DEACETYLASE	1.22057	0.287555	0.0876429	2701.52	3297.39
BMEI1436	-	pyruvate phosphate dikinase	0.749157	-0.41666	0.18974	1321.08	989.699
BMEI1437	-	PUTATIVE HYDROXLASE	1.33863	0.420759	0.206977	1293.04	1730.9
BMEI1438	-	COBALT-ZINC-CADMIUM RESISTANCE PROTEIN CZCD	1.27879	0.35478	0.152247	1492.56	1908.68
BMEI1439	-	CHROMOSOME SEGREGATION PROTEIN SMC2	1.11841	0.161452	0.0580149	787.851	881.142
BMEI1440	-	THIOL:DISULFIDE INTERCHANGE PROTEIN DSBA	0.66894	-0.580051	0.448684	2018.14	1350.02
BMEI1441	-	Hypothetical Cytosolic Protein	1.15802	0.211659	0.088494	1133.94	1313.12
BMEI1442	-	A/G-SPECIFIC ADENINE GLYCOSYLASE	1.11976	0.163193	0.0707893	956.062	1070.56
BMEI1443	-	2-HALOALKANOIC ACID DEHALOGENASE I	1.09355	0.129022	0.0562984	817.665	894.159
BMEI1444	-	ADENINE-SPECIFIC METHYLTRANSFERASE	2.23754	1.16191	0.998094	3305.08	7395.24
BMEI1445	-	CHLORIDE CHANNEL PROTEIN	0.970587	-0.0430703	0.0612025	1052.07	1021.12
BMEI1446	-	PHOSPHOGLYCOLATE PHOSPHATASE	1.34446	0.427024	0.210537	1159.61	1559.04
BMEI1447	-	hypothetical protein BMEI1447	1.22477	0.29251	0.0550934	4405.03	5395.14
BMEI1448	-	C-DI-GMP PHOSPHODIESTERASE A-RELATED PROTEIN	1.01103	0.0158219	0.06585	1863.65	1884.2
BMEI1449	-	hypothetical protein BMEI1449	0.805801	-0.311504	0.120974	2270.03	1829.19
BMEI1450	-	threonine synthase	0.999254	-0.00107605	0.0678922	1374.47	1373.45
BMEI1451	-	PROCESSING PEPTIDASE	1.76061	0.816073	0.637582	6877.11	12107.9
BMEI1452	-	RIBOSOMAL-PROTEIN-ALANINE ACETYLTRANSFERASE	1.13399	0.181407	0.0830941	1680.72	1905.92
BMEI1453	-	Diguanylate cyclase/phosphodiesterase domain 2 (EAL)	0.732639	-0.448825	0.173927	3830.19	2806.15
BMEI1454	-	hypothetical protein BMEI1454	1.35902	0.44257	0.19484	2266.86	3080.71
BMEI1455	-	THIO:disulfide Interchange Protein	0.934342	-0.0979767	0.0617487	2521.24	2355.7
BMEI1456	-	THIOL PEROXIDASE	0.992719	-0.0105421	0.0667106	1267.87	1258.64
BMEI1457	rnhA	ribonuclease H	0.863859	-0.211133	0.087655	2083.31	1799.69
BMEI1458	-	homoserine kinase	0.618022	-0.69427	0.695987	2005.37	1239.36
BMEI1459	ispH	4-hydroxy-3-methylbut-2-enyl diphosphate reductase	0.483032	-1.04981	0.992739	4668.81	2255.18
BMEI1460	-	SURFEIT LOCUS PROTEIN 1	1.38275	0.467541	0.222707	839.548	1160.89
BMEI1461	-	ZINC-FINGER PROTEIN	1.50483	0.589596	0.467934	1377.91	2073.52
BMEI1462	-	CYTOCHROME C OXIDASE POLYPEPTIDE III	1.61015	0.687198	0.386584	5479.06	8822.13
BMEI1463	-	cytochrome C oxidase assembly protein	2.24023	1.16364	0.998969	1551.09	3474.8
BMEI1464	-	protoheme IX farnesyltransferase	1.64356	0.71682	0.573101	3809.37	6260.91
BMEI1465	-	CYTOCHROME C OXIDASE POLYPEPTIDE I	0.996702	-0.00476645	0.0236904	5901.43	5881.97
BMEI1466	-	CYTOCHROME C OXIDASE POLYPEPTIDE II	1.81711	0.861643	0.764827	6497.65	11806.9
BMEI1467	-	hypothetical protein BMEI1467	0.823568	-0.280041	0.113474	1534.94	1264.12
BMEI1468	-	TLDD PROTEIN	0.353182	-1.50152	0.999997	6245.37	2205.75
BMEI1469	gmk	guanylate kinase	1.25252	0.324828	0.115281	2234.27	2798.46
BMEI1470	-	hypothetical protein BMEI1470	1.10325	0.141765	0.0427445	666.321	735.121
BMEI1471	-	4-AMINO-4-DEOXYCHORISMATE LYASE	0.655716	-0.608857	0.419301	4051.4	2656.57
BMEI1472	-	hypothetical protein BMEI1472	0.853072	-0.229261	0.0805901	1044.6	891.117
BMEI1473	-	3-oxoacyl-(acyl carrier protein) synthase II	0.974195	-0.0377169	0.0582697	2475.9	2412.01
BMEI1474	-	hypothetical protein BMEI1474	1.19959	0.262539	0.0938643	2157.13	2587.66
BMEI1475	acpP	acyl carrier protein	1.03554	0.0503797	0.0136912	8704.86	9014.21
BMEI1476	-	hypothetical protein BMEI1476	1.43312	0.519163	0.198631	3766.57	5397.96
BMEI1477	fabG	3-ketoacyl-(acyl-carrier-protein) reductase	1.23044	0.299175	0.0407	5744.76	7068.59
BMEI1478	-	acyl-carrier-protein S-malonyltransferase	0.909607	-0.136684	0.0732358	2067.81	1880.9
BMEI1479	-	hypothetical protein BMEI1479	0.943155	-0.0844326	0.00256317	26561.3	25051.4
BMEI1480	rpsF	30S ribosomal protein S6	0.959837	-0.0591381	0.00141177	36737.9	35262.4
BMEI1481	rpsR	30S ribosomal protein S18	1.22498	0.292763	0.0216151	8873.61	10870
BMEI1482	-	hypothetical protein BMEI1482	0.963104	-0.0542364	0.0687222	1741.04	1676.8
BMEI1483	rplI	50S ribosomal protein L9	0.619797	-0.690132	0.44342	7574.85	4694.87
BMEI1484	-	CYCLOPROPANE-FATTY-ACYL-PHOSPHOLIPID SYNTHASE	1.22262	0.289975	0.0556856	4329.34	5293.13
BMEI1485	-	replicative DNA helicase	1.16824	0.224338	0.0862101	2035.59	2378.06
BMEI1486	-	DNA repair protein RadA	0.987449	-0.0182218	0.0577215	980.153	967.851
BMEI1487	-	COLICIN V PRODUCTION PROTEIN	1.47507	0.560781	0.156977	5988.09	8832.83
BMEI1488	-	amidophosphoribosyltransferase	0.950277	-0.0735802	0.0624019	2342.02	2225.57
BMEI1489	-	ribitol-5-phosphate dehydrogenase	0.954478	-0.0672165	0.0677095	1238.6	1182.21
BMEI1490	-	CDP-DIACYLGLYCEROL--SERINE O-PHOSPHATIDYLTRANSFERASE	1.03791	0.0536812	0.069388	1376.3	1428.47
BMEI1491	-	phosphatidylserine decarboxylase	1.26925	0.343978	0.118881	2405.66	3053.39
BMEI1492	-	HEAVY METAL TOLERANCE PROTEIN PRECURSOR	0.907975	-0.139275	0.0739583	2042.47	1854.51
BMEI1493	-	peptidoglycan binding protein (LysM domain)	1.00561	0.00807047	0.0682667	1543.19	1551.85
BMEI1494	-	hypothetical protein BMEI1494	1.37928	0.463916	0.0700161	6993.52	9646.03
BMEI1495	-	LYSINE DECARBOXYLASE	1.0203	0.028996	0.0661066	1855.81	1893.48
BMEI1496	-	TRNA (URACIL-5-) -METHYLTRANSFERASE	1.07899	0.109684	0.0436399	703.06	758.596
BMEI1497	-	HEMOLYSIN	1.01536	0.0219957	0.0464633	794.087	806.287
BMEI1498	-	1-deoxy-D-xylulose-5-phosphate synthase	0.928739	-0.106655	0.0735894	1490.84	1384.6
BMEI1499	-	PIRIN	0.865485	-0.208419	0.0834765	1180.95	1022.1
BMEI1500	-	hypothetical protein BMEI1500	1.19175	0.253085	0.103741	1297.69	1546.52
BMEI1501	-	TRANSGLYCOSYLASE ASSOCIATED PROTEIN	1.16066	0.214949	0.0576039	3359.86	3899.66
BMEI1502	-	ALKALINE PHOSPHATASE LIKE PROTEIN	0.895031	-0.15999	0.0676055	1019.45	912.439
BMEI1503	-	exodeoxyribonuclease VII small subunit	1.16591	0.221456	0.0900605	1805.66	2105.24
BMEI1504	-	acetylspermidine deacetylase	1.58551	0.66495	0.610082	1829.67	2900.96
BMEI1505	-	GTP CYCLOHYDROLASE II / 3,4-DIHYDROXY-2-BUTANONE 4-PHOSPHATE SYNTHASE	0.677465	-0.561782	0.38396	1349.03	913.922
BMEI1506	-	chorismate synthase	0.942336	-0.085687	0.0403671	731.885	689.681
BMEI1507	-	hypothetical protein BMEI1507	0.208206	-2.26392	1	6399.33	1332.38
BMEI1508	-	putative lipoprotein	2.26977	1.18255	0.999195	1766.76	4010.14
BMEI1509	-	hypothetical protein BMEI1509	6.92793	2.79243	1	1620.36	11225.7
BMEI1510	-	COLD SHOCK PROTEIN CSPA	12.519	3.64605	1	1919.87	24035
BMEI1511	-	Phosphoglycerate mutase/fructose-2,6-bisphosphatase	0.828891	-0.270745	0.106921	2058.01	1705.87
BMEI1512	-	enoyl-(acyl carrier protein) reductase	0.988337	-0.0169244	0.0329264	4539.85	4486.9
BMEI1513	-	CHAPERONE PROTEIN DNAJ	0.6707	-0.57626	0.129382	11354.7	7615.62
BMEI1514	-	hypothetical protein BMEI1514	1.46011	0.546073	0.255447	3367.99	4917.62
BMEI1515	-	17 KD COMMON-ANTIGEN	1.41579	0.501602	0.0842503	7234.17	10242
BMEI1516	-	hypothetical protein BMEI1516	1.53095	0.614423	0.0886727	12252.8	18758.4
BMEI1517	-	pyridoxamine 5'-phosphate oxidase	0.997243	-0.0039824	0.0681771	1573.12	1568.78
BMEI1518	ubiA	prenyltransferase	1.04695	0.066198	0.0613313	992.842	1039.46
BMEI1519	-	phosphoribosylamine--glycine ligase	1.02581	0.0367628	0.0341575	655.221	672.132
BMEI1520	-	RESPONSE REGULATOR PROTEIN	0.955307	-0.0659631	0.0448626	785.011	749.927
BMEI1521	-	ACYL-COA DEHYDROGENASE	0.930211	-0.10437	0.0514477	850.312	790.97
BMEI1522	-	enoyl-CoA hydratase	0.967612	-0.0474994	0.0531217	897.644	868.571
BMEI1523	-	hypothetical protein BMEI1523	1.22306	0.290496	0.0269246	7586.51	9278.77
BMEI1524	-	hypothetical protein BMEI1524	1.22661	0.294674	0.107805	957.902	1174.97
BMEI1525	-	Helix-turn-helix protein, copG family	1.30123	0.37988	0.168431	1571.66	2045.1
BMEI1526	-	Hypothetical Cytosolic Protein	1.58252	0.662222	0.432397	3943.04	6239.93
BMEI1527	-	GLYCOLATE OXIDASE SUBUNIT GLCD	0.801575	-0.319091	0.111214	1089.52	873.329
BMEI1528	-	SUA5 PROTEIN	1.09798	0.134848	0.0627917	895.343	983.066
BMEI1529	glyS	glycyl-tRNA synthetase subunit beta	0.913983	-0.129761	0.076406	1597.77	1460.34
BMEI1530	glyQ	glycyl-tRNA synthetase subunit alpha	1.10209	0.140237	0.0739113	1866.06	2056.56
BMEI1531	-	TETRATRICOPEPTIDE REPEAT FAMILY PROTEIN	0.93165	-0.10214	0.0565136	2887.41	2690.06
BMEI1532	-	FARNESYL PYROPHOSPHATE SYNTHETASE / GERANYLTRANSTRANSFERASE	1.10892	0.149156	0.06801	2277.12	2525.14
BMEI1533	-	hypothetical protein BMEI1533	0.939953	-0.0893399	0.0699558	1282.78	1205.75
BMEI1534	-	METHYLTRANSFERASE	0.959336	-0.0598925	0.065669	1167.96	1120.46
BMEI1535	-	NA(+)/H(+) ANTIPORTER 1 / PROTEASE IV	0.325772	-1.61807	1	6658.15	2169.04
BMEI1536	-	hypothetical protein BMEI1536	0.47108	-1.08596	0.996193	4071.04	1917.79
BMEI1537	-	4-DIPHOSPHOCYTIDYL-2-C-METHYL-D-ERYTHRITOL KINASE	0.659033	-0.601577	0.464659	1381.5	910.456
BMEI1538	-	hypothetical protein BMEI1538	1.09773	0.134526	0.0164658	459.286	504.172
BMEI1539	-	hypothetical protein BMEI1539	0.547586	-0.868844	0.87373	7202	3943.71
BMEI1540	-	GLYCOSYLTRANSFERASE	1.22745	0.295667	0.0743323	677.095	831.102
BMEI1541	-	TRANSPORTER	1.44246	0.528532	0.317612	879.657	1268.87
BMEI1542	rnhB	ribonuclease HII	1.12591	0.171089	0.0624375	820.222	923.495
BMEI1543	-	F0F1 ATP synthase subunit B	0.854277	-0.227224	0.0830506	1090.59	931.663
BMEI1544	-	F0F1 ATP synthase subunit B'	1.02662	0.0379049	0.0188619	6944.43	7129.31
BMEI1545	-	F0F1 ATP synthase subunit C	0.566939	-0.818735	0.504322	17741.9	10058.6
BMEI1546	-	F0F1 ATP synthase subunit A	0.672242	-0.572948	0.182447	8375.52	5630.38
BMEI1547	-	ATP SYNTHASE	0.798528	-0.324584	0.132672	2004.53	1600.68
BMEI1548	-	SPORE-CORTEX-LYTIC ENZYME PREPEPTIDE PRECURSOR	2.39344	1.25908	0.999794	1075.93	2575.17
BMEI1549	-	DNAK PROTEIN	1.10281	0.141179	0.0340551	595.257	656.453
BMEI1550	engA	GTP-binding protein EngA	0.855828	-0.224607	0.0510099	747.667	639.874
BMEI1551	-	Hypothetical Membrane Associated Protein	0.682215	-0.551703	0.368634	2758.23	1881.7
BMEI1552	-	hypothetical protein BMEI1552	0.895215	-0.159695	0.0808508	1529.66	1369.37
BMEI1553	-	transport protein	0.90132	-0.149889	0.0245316	6837.39	6162.68
BMEI1554	-	TRANSPORTER, MFS superfamily	1.04558	0.0643048	0.0303659	608.348	636.077
BMEI1555	-	TRANSPORTER, MFS superfamily	1.12853	0.174439	0.0810428	1167.53	1317.59
BMEI1556	-	INTEGRAL MEMBRANE PROTEIN	0.609356	-0.714643	0.732359	2493.04	1519.15
BMEI1557	-	ARSENATE REDUCTASE	1.11213	0.153329	0.0797897	1480.44	1646.45
BMEI1558	-	ADA REGULATORY PROTEIN / O-6-METHYLGUANINE-DNA-ALKYLTRANSFERASE	0.838024	-0.254937	0.103417	1458.5	1222.26
BMEI1560	-	SALICYLALDEHYDE DEHYDROGENASE	1.12075	0.16446	0.045073	663.844	744.001
BMEI1561	-	OUTER MEMBRANE PROTEIN	1.10723	0.146954	0.0776848	1246.39	1380.04
BMEI1562	-	hypothetical protein BMEI1562	0.895615	-0.15905	0.0691931	2548.35	2282.34
BMEI1563	-	FERRIC UPTAKE REGULATION PROTEIN	0.58036	-0.78498	0.293512	23958.2	13904.4
BMEI1564	-	CYTOCHROME C OXIDASE POLYPEPTIDE I HOMOLOG, BACTEROID	0.168537	-2.56886	1	6106.58	1029.19
BMEI1565	-	cytochrome c oxidase, monoheme subunit, membrane-bound	0.252284	-1.98688	1	4511.81	1138.26
BMEI1566	-	cytochrome c oxidase, diheme subunit, membrane-bound	0.330367	-1.59786	1	3929.57	1298.2
BMEI1567	-	NITROGEN FIXATION PROTEIN FIXG	0.432694	-1.20858	0.999515	2465.01	1066.59
BMEI1568	-	NITROGEN FIXATION PROTEIN FIXH	0.865363	-0.208622	0.080209	1109.54	960.158
BMEI1569	-	NITROGEN FIXATION PROTEIN FIXI (E1-E2 TYPE CATION ATPASE FIXI)	0.806918	-0.309506	0.127105	1611.25	1300.15
BMEI1570	-	PUTATIVE HYDROXYPYRUVATE REDUCTASE	1.15545	0.208452	0.090287	1560.95	1803.59
BMEI1571	-	guanine deaminase	1.02125	0.0303312	0.0461601	786.447	803.156
BMEI1572	-	Hypothetical Membrane Spanning Protein	0.887905	-0.171523	0.0829783	1654.75	1469.26
BMEI1573	-	TRANSCRIPTIONAL REGULATORY PROTEIN, LYSR FAMILY	1.18736	0.247753	0.0911556	964.73	1145.48
BMEI1574	-	XdhC protein (assists in molybdopterin insertion into xanthine dehydrogenase)	1.24925	0.321062	0.102659	795.959	994.352
BMEI1575	-	XANTHINE DEHYDROGENASE	1.06144	0.0860274	0.0716445	1388.58	1473.9
BMEI1576	-	XANTHINE DEHYDROGENASE	0.961895	-0.0560487	0.0688916	1732.27	1666.26
BMEI1577	-	CHITOOLIGOSACCHARIDE DEACETYLASE	0.909845	-0.136307	0.0677556	1073.51	976.727
BMEI1578	-	hypothetical protein BMEI1578	1.01352	0.0193808	0.0570515	2479.63	2513.17
BMEI1579	-	PERIPLASMIC MANNITOL-BINDING PROTEIN	0.815124	-0.294909	0.115269	1333.76	1087.18
BMEI1580	-	MANNITOL TRANSPORTER, LARGE SUBUNIT	1.22415	0.291783	0.110016	1009.78	1236.13
BMEI1581	-	TRIPARTITE TRANSPORTER, SMALL SUBUNIT	1.12982	0.176089	0.0838333	1360.57	1537.2
BMEI1582	-	TRANSCRIPTIONAL REGULATORY PROTEIN DEGU	1.09362	0.129112	0.0742441	1196.58	1308.61
BMEI1583	-	SENSOR PROTEIN DEGS	1.06658	0.092987	0.041573	696.252	742.606
BMEI1584	-	INVASION PROTEIN B	0.602306	-0.73143	0.371869	12872.4	7753.13
BMEI1585	-	Na+ DRIVEN MULTIDRUG EFFLUX PUMP	1.16462	0.21986	0.0600153	712.279	829.535
BMEI1586	-	PROLINE RACEMASE	0.970885	-0.0426276	0.0520792	882.751	857.049
BMEI1587	-	hypothetical protein BMEI1587	1.95875	0.969932	0.982158	997.092	1953.05
BMEI1588	-	carboxynorspermidine dehydrogenase	0.917829	-0.123702	0.0622225	2668.49	2449.22
BMEI1589	-	CARBOXYNORSPERMIDINE DECARBOXYLASE	0.951692	-0.0714331	0.0542094	906.299	862.518
BMEI1590	-	hypothetical protein BMEI1590	0.753587	-0.408155	0.165721	1133.86	854.461
BMEI1591	-	FERREDOXIN-NADP REDUCTASE	0.250811	-1.99533	1	7605.86	1907.63
BMEI1592	panB	3-methyl-2-oxobutanoate hydroxymethyltransferase	1.20077	0.263962	0.106789	1231.84	1479.16
BMEI1593	panC	pantoate--beta-alanine ligase	1.10869	0.148856	0.0791396	1394.87	1546.48
BMEI1594	-	hypothetical protein BMEI1594	1.25168	0.32386	0.125926	1021.63	1278.75
BMEI1595	-	hypothetical protein BMEI1595	1.25267	0.325007	0.0989023	758.431	950.064
BMEI1596	-	LrgB protein	1.18475	0.244582	0.100171	1569.32	1859.26
BMEI1597	-	murein hydrolase exporter	1.61978	0.695799	0.68656	1678.77	2719.24
BMEI1598	-	TRANSCRIPTIONAL REGULATORY PROTEIN, LYSR FAMILY	0.943617	-0.0837269	0.0330291	659.921	622.712
BMEI1599	-	hypothetical protein BMEI1599	0.258438	-1.95211	1	10007.1	2586.21
BMEI1600	-	UREASE OPERON 23 KDA ACCESSORY PROTEIN	0.461246	-1.11639	0.995832	7627.14	3517.98
BMEI1601	-	hypothetical protein BMEI1601	0.711359	-0.491351	0.257767	1212.7	862.666
BMEI1602	-	GLYCOSYLTRANSFERASE	1.04736	0.0667516	0.0620565	1007.98	1055.71
BMEI1603	-	Polysaccharide deacetylase	0.241957	-2.04718	1	5259.49	1272.57
BMEI1604	-	5-aminolevulinate synthase	0.681372	-0.553485	0.150695	8738.02	5953.85
BMEI1605	-	LARGE CONDUCTANCE MECHANOSENSITIVE CHANNEL	1.16896	0.22522	0.0945171	1569.32	1834.47
BMEI1606	-	SENSORY TRANSDUCTION HISTIDINE KINASE	1.01794	0.0256588	0.0485648	819.105	833.803
BMEI1607	-	GLYCEROL METABOLISM ACTIVATOR	1.12172	0.165716	0.0819476	1459.28	1636.9
BMEI1608	-	PROLINE IMINOPEPTIDASE	0.753429	-0.408457	0.17858	2590.51	1951.77
BMEI1609	-	hypothetical protein BMEI1609	0.639217	-0.645622	0.581754	1644.53	1051.21
BMEI1610	-	Hypothetical Cytosolic Protein	0.794339	-0.332173	0.101757	951.667	755.947
BMEI1611	-	dihydroorotate dehydrogenase 2	0.904917	-0.144142	0.0747452	1244.89	1126.53
BMEI1612	-	Na+ DRIVEN MULTIDRUG EFFLUX PUMP	0.83717	-0.256408	0.100765	1316.18	1101.87
BMEI1613	-	hypothetical protein BMEI1613	0.849445	-0.235407	0.0924011	2207.72	1875.34
BMEI1614	-	hypothetical protein BMEI1614	1.11258	0.153915	0.0182549	7664.76	8527.69
BMEI1615	-	TRANSCRIPTIONAL REGULATOR, ARAC FAMILY	1.09491	0.130816	0.0709977	1069.28	1170.77
BMEI1616	-	2'-deoxycytidine 5'-triphosphate deaminase	1.24877	0.320504	0.092025	727.795	908.846
BMEI1617	-	O-succinylhomoserine sulfhydrylase	0.812689	-0.299225	0.122288	1619.59	1316.22
BMEI1618	apaG	ApaG	0.625621	-0.676638	0.656501	2279.89	1426.35
BMEI1619	hslO	Hsp33-like chaperonin	0.770982	-0.375231	0.164059	1472.71	1135.43
BMEI1620	-	ornithine carbamoyltransferase	0.663824	-0.591126	0.382763	4016.22	2666.07
BMEI1621	argD	bifunctional N-succinyldiaminopimelate-aminotransferase/acetylornithine transaminase protein	0.739612	-0.43516	0.21434	1442.79	1067.1
BMEI1622	-	hypothetical protein BMEI1622	1.42669	0.512671	0.247291	714.967	1020.04
BMEI1623	-	hypothetical protein BMEI1623	1.73044	0.79114	0.81515	2591.24	4483.99
BMEI1624	-	PHOSPHATE REGULON SENSOR PROTEIN PHOR	1.25179	0.323995	0.119719	936.267	1172.01
BMEI1625	-	UDP-GALACTOSE-LIPID CARRIER TRANSFERASE	0.507385	-0.978846	0.984704	2202.07	1117.3
BMEI1626	-	N-ACETYLGLUCOSAMINYLTRANSFERASE	1.00201	0.0029023	0.0450484	783.773	785.351
BMEI1627	-	ARGININE-BINDING PERIPLASMIC PROTEIN	1.56773	0.648675	0.575873	1798.55	2819.64
BMEI1628	-	hypothetical protein BMEI1628	5.03757	2.33273	1	573.558	2889.34
BMEI1629	-	MULTIDRUG RESISTANCE PROTEIN MEXB	0.536783	-0.897589	0.956864	2602.72	1397.1
BMEI1630	-	ACRIFLAVIN RESISTANCE PROTEIN A PRECURSOR	0.578645	-0.78925	0.850725	1619.09	936.876
BMEI1631	-	TRANSCRIPTIONAL REGULATOR, TETR FAMILY	1.26565	0.339883	0.138996	1697.61	2148.59
BMEI1632	-	acyl-CoA synthetase	1.02201	0.0314136	0.058424	972.349	993.754
BMEI1633	-	Hydrolases of the alpha/beta superfamily	1.14965	0.20119	0.0523367	679.188	780.826
BMEI1634	-	PHOSPHOGLYCOLATE PHOSPHATASE	0.814609	-0.29582	0.0820089	888.378	723.681
BMEI1635	-	ARGININE/ORNITHINE TRANSPORT OPERON PROTEIN AOT	0.718251	-0.477439	0.20946	3717.57	2670.15
BMEI1636	pgi	glucose-6-phosphate isomerase	0.608199	-0.717385	0.742645	2129.92	1295.42
BMEI1637	-	CoxG protein	0.780086	-0.358296	0.134879	1146.21	894.14
BMEI1638	-	putative oxidoreductase	4.99187	2.31958	1	2852.24	14238
BMEI1639	-	dihydropyrimidine dehydrogenase	4.23116	2.08105	1	1644.09	6956.38
BMEI1640	-	PHOSPHOHYDROLASE (MUTT/NUDIX FAMILY PROTEIN)	1.4597	0.545669	0.301212	722.819	1055.1
BMEI1641	-	TRANSCRIPTIONAL REGULATOR, TETR FAMILY	1.226	0.293956	0.0703906	657.671	806.303
BMEI1643	-	allantoate amidohydrolase	1.88179	0.912109	0.963224	1049.11	1974.2
BMEI1644	-	dihydropyrimidinase	1.84495	0.883581	0.947812	1029.95	1900.21
BMEI1645	-	ACRIFLAVIN RESISTANCE PROTEIN B	0.760342	-0.39528	0.167236	1249.28	949.877
BMEI1646	-	ACRIFLAVIN RESISTANCE PROTEIN E	0.578136	-0.790519	0.86274	2122.11	1226.87
BMEI1647	-	hypothetical protein BMEI1647	0.724975	-0.463998	0.229535	2810.53	2037.56
BMEI1648	-	Sensory Transduction Protein Kinase	0.689632	-0.536101	0.343328	1381.57	952.776
BMEI1649	-	UREASE ACCESSORY PROTEIN UREG	0.760167	-0.395612	0.182996	1929.03	1466.39
BMEI1650	-	UREASE ACCESSORY PROTEIN UREF	0.977315	-0.0331049	0.0672706	1285.78	1256.61
BMEI1651	ureE	urease accessory protein UreE	0.781996	-0.354766	0.124452	1059.26	828.34
BMEI1652	ureC	urease subunit alpha	0.908117	-0.13905	0.0773867	1693.41	1537.81
BMEI1653	ureB	urease subunit beta	0.798376	-0.324859	0.0887397	875.205	698.743
BMEI1654	-	UREASE GAMMA SUBUNIT	0.831552	-0.266121	0.0890716	1038.06	863.203
BMEI1655	-	UREASE ACCESSORY PROTEIN URED	0.899489	-0.152823	0.0411697	714.92	643.062
BMEI1656	-	hypothetical protein BMEI1656	0.766485	-0.383671	0.17107	1500.13	1149.83
BMEI1657	-	hypothetical protein BMEI1657	1.11917	0.162433	0.0810906	1324.33	1482.15
BMEI1658	-	hypothetical protein BMEI1658	1.26119	0.334791	0.0705496	4103.65	5175.5
BMEI1659	-	hypothetical protein BMEI1659	1.28737	0.364425	0.0451753	6541.1	8420.81
BMEI1660	-	hypothetical protein BMEI1660	1.23639	0.306134	0.0754306	3450.42	4266.07
BMEI1661	-	RECOMBINASE	0.827072	-0.273916	0.106467	2159.78	1786.29
BMEI1662	-	hypothetical protein BMEI1662	1.50833	0.592953	0.43036	2124.25	3204.07
BMEI1663	-	ANTIREPRESSOR PROTEIN ANT	1.08528	0.118062	0.0364941	631.705	685.574
BMEI1664	-	Hypothetical Cytosolic Protein	0.926866	-0.109568	0.0727727	1351.33	1252.5
BMEI1665	-	hypothetical protein BMEI1665	0.878193	-0.187391	0.0641849	920.27	808.174
BMEI1666	-	UDP-N-acetylglucosamine 1-carboxyvinyltransferase	0.754932	-0.405582	0.139545	3736.13	2820.52
BMEI1667	-	Hypothetical Cytosolic Protein	0.789487	-0.341012	0.103823	3588	2832.68
BMEI1668	hisD	histidinol dehydrogenase	0.779408	-0.359549	0.156238	1819	1417.74
BMEI1669	-	hypothetical protein BMEI1669	0.99972	-0.000403346	0.0295822	622.454	622.28
BMEI1670	-	ARSENATE REDUCTASE	0.917244	-0.124622	0.0354261	673.819	618.056
BMEI1671	infA	translation initiation factor IF-1	1.00025	0.000361577	0.0402418	3745.75	3746.69
BMEI1672	maf	Maf-like protein	0.963669	-0.0533908	0.065353	2042.98	1968.75
BMEI1673	-	zinc-binding protein	0.68566	-0.544434	0.376976	1689.05	1158.11
BMEI1674	-	hypothetical protein BMEI1674	0.813226	-0.298271	0.101126	1063.59	864.939
BMEI1675	-	hypothetical protein BMEI1675	0.946421	-0.0794453	0.043283	764.356	723.403
BMEI1676	-	hypothetical protein BMEI1676	1.15062	0.202407	0.0437501	614.819	707.42
BMEI1677	-	hypothetical protein BMEI1677	1.00074	0.00106902	0.0670916	1292.88	1293.84
BMEI1678	-	hypothetical protein BMEI1678	0.86568	-0.208094	0.0527099	777.46	673.032
BMEI1679	-	hypothetical protein BMEI1679	1.06808	0.0950246	0.0514734	801.408	855.971
BMEI1680	-	hypothetical protein BMEI1680	0.834972	-0.2602	0.105226	1887.98	1576.41
BMEI1681	-	hypothetical protein BMEI1681	0.72716	-0.459655	0.223782	1235.34	898.289
BMEI1682	-	hypothetical protein BMEI1682	0.911764	-0.133267	0.0637487	1001.79	913.398
BMEI1683	-	ZINC-DEPENDENT METALLOPEPTIDASE	0.657356	-0.605254	0.415576	3973.18	2611.79
BMEI1684	-	hypothetical protein BMEI1684	0.520383	-0.942354	0.975278	2147.76	1117.66
BMEI1685	-	hypothetical protein BMEI1685	0.967765	-0.0472714	0.0517856	877.751	849.457
BMEI1686	-	hypothetical protein BMEI1686	1.07261	0.101131	0.0637521	2249.03	2412.34
BMEI1687	-	hypothetical protein BMEI1687	1.12028	0.163863	0.0816652	1412.1	1581.95
BMEI1688	-	hypothetical protein BMEI1688	1.71334	0.776808	0.825806	1913.67	3278.77
BMEI1689	-	hypothetical protein BMEI1689	1.07206	0.10038	0.0596524	908.149	973.586
BMEI1690	-	hypothetical protein BMEI1690	0.939905	-0.0894131	0.0702835	1301.81	1223.58
BMEI1691	-	Hypothetical Membrane Spanning Protein	1.01697	0.0242759	0.0680238	1344.92	1367.74
BMEI1692	-	FLAGELLAR PROTEIN FLGJ	1.15757	0.211094	0.0726755	849.071	982.855
BMEI1693	-	hypothetical protein BMEI1693	0.854726	-0.226466	0.0858448	1145.44	979.039
BMEI1694	-	hypothetical protein BMEI1694	0.862488	-0.213423	0.0831517	2389.01	2060.49
BMEI1695	-	hypothetical protein BMEI1695	0.996958	-0.00439563	0.0574008	971.5	968.545
BMEI1696	-	Hypothetical Membrane Spanning Protein	1.0144	0.0206235	0.0498039	838.171	850.239
BMEI1697	-	virulence-associated protein E	0.998573	-0.00206083	0.0526902	889.086	887.817
BMEI1698	-	hypothetical protein BMEI1698	1.02489	0.0354717	0.0400438	715	732.797
BMEI1699	-	hypothetical protein BMEI1699	1.27273	0.347924	0.0304176	420.397	535.051
BMEI1700	-	hypothetical protein BMEI1700	1.03671	0.0520065	0.0287529	598.855	620.836
BMEI1701	-	hypothetical protein BMEI1701	0.734033	-0.446083	0.197018	3122	2291.65
BMEI1702	-	TRANSPOSASE	0.817981	-0.28986	0.115468	2012.59	1646.26
BMEI1703	-	hypothetical protein BMEI1703	0.943952	-0.0832147	0.0231117	568.525	536.66
BMEI1704	-	hypothetical protein BMEI1704	1.15819	0.211872	0.0639234	758.887	878.935
BMEI1705	-	hypothetical protein BMEI1705	0.945436	-0.0809488	0.0676639	2013.4	1903.54
BMEI1706	-	hypothetical protein BMEI1706	0.869847	-0.201167	0.0846223	1256.07	1092.58
BMEI1707	-	MANDELATE RACEMASE	0.820846	-0.284816	0.110653	2172.84	1783.57
BMEI1708	-	2-HYDROXYHEPTA-2,4-DIENE-1,7-DIOATE ISOMERASE / 5-CARBOXYMETHYL-2-OXO-HEX-3-ENE-1,7-DIOATE DECARBOXYLASE	0.80821	-0.307198	0.105326	2862.46	2313.47
BMEI1709	-	OXIDOREDUCTASE UCPA	0.801102	-0.319942	0.0982798	3403.57	2726.61
BMEI1710	-	OXIDOREDUCTASE	1.16123	0.215652	0.0787517	2289.43	2658.55
BMEI1711	-	hypothetical protein BMEI1711	1.12657	0.171942	0.0686214	897.499	1011.1
BMEI1712	-	MANDELATE RACEMASE	1.04436	0.0626149	0.06832	1229.84	1284.39
BMEI1713	-	MALTOSE/MALTODEXTRIN TRANSPORT ATP-BINDING PROTEIN MALK	0.989332	-0.015474	0.0637423	1133.13	1121.05
BMEI1714	-	MALTOSE TRANSPORT SYSTEM PERMEASE PROTEIN MALG	0.999251	-0.00108112	0.0576489	2448.13	2446.3
BMEI1715	-	MALTOSE TRANSPORT SYSTEM PERMEASE PROTEIN MALF	0.91397	-0.129781	0.0341564	5063.64	4628.02
BMEI1716	-	TREHALOSE/MALTOSE BINDING PROTEIN	1.47684	0.562515	0.226295	4303.1	6354.99
BMEI1717	-	TRANSCRIPTIONAL REGULATOR, ICLR FAMILY	1.10003	0.137546	0.0699061	1018.38	1120.25
BMEI1718	-	Purine/pyrimidine phosphoribosyl transferase	0.838438	-0.254224	0.0797447	963.675	807.982
BMEI1719	-	SARCOSINE OXIDASE GAMMA SUBUNIT	0.833405	-0.26291	0.0821737	967.648	806.442
BMEI1720	-	SARCOSINE OXIDASE ALPHA SUBUNIT	1.20892	0.273717	0.0825367	780.684	943.783
BMEI1721	-	SARCOSINE OXIDASE DELTA SUBUNIT	0.896594	-0.157473	0.0573074	877.191	786.484
BMEI1722	-	SARCOSINE OXIDASE BETA SUBUNIT	0.984455	-0.0226026	0.0515332	875.203	861.598
BMEI1723	-	NADP-SPECIFIC GLUTAMATE DEHYDROGENASE	1.36219	0.445931	0.231597	1503.13	2047.56
BMEI1724	-	hypothetical protein BMEI1724	0.949097	-0.0753718	0.0694727	1312.7	1245.88
BMEI1725	-	GLYCINE BETAINE-BINDING PROTEIN PRECURSOR	0.980681	-0.0281435	0.0684383	1418.36	1390.96
BMEI1726	-	GLYCINE BETAINE/L-PROLINE TRANSPORT SYSTEM PERMEASE PROTEIN PROW	1.15569	0.208752	0.0627883	754.368	871.814
BMEI1727	-	GLYCINE BETAINE/L-PROLINE TRANSPORT ATP-BINDING PROTEIN PROV	1.0959	0.132119	0.0347217	606.992	665.204
BMEI1728	-	GLYCINE BETAINE/L-PROLINE TRANSPORT SYSTEM PERMEASE PROTEIN PROW	1.40337	0.4889	0.279234	1684.95	2364.62
BMEI1729	-	MERCURIC RESISTANCE OPERON REGULATORY PROTEIN	0.462305	-1.11308	0.989814	14465.7	6687.56
BMEI1730	-	COPPER-TRANSPORTING ATPASE	1.0256	0.036467	0.0534591	2724.9	2794.66
BMEI1731	-	Diguanylate cyclase/phosphodiesterase domain 2 (EAL)	0.7697	-0.377632	0.125506	3549.28	2731.88
BMEI1732	-	PHOSPHOMETHYLPYRIMIDINE KINASE / HYDROXYMETHYLPYRIMIDINE KINASE	0.54112	-0.88598	0.948425	1825.13	987.615
BMEI1733	-	THIAMINE BIOSYNTHESIS OXIDOREDUCTASE THIO	0.541128	-0.885958	0.945773	1661.8	899.249
BMEI1734	-	hypothetical protein BMEI1734	0.388041	-1.36572	0.999947	1555.76	603.699
BMEI1735	thiG	thiazole synthase	0.387887	-1.36629	0.999965	2116.39	820.92
BMEI1736	thiE	thiamine-phosphate pyrophosphorylase	0.475081	-1.07375	0.993106	1273.22	604.885
BMEI1737	-	ABC TRANSPORTER SUBSTRATE-BINDING PROTEIN	0.273123	-1.87238	1	3350.59	915.125
BMEI1738	-	TRANSCRIPTIONAL ACTIVATOR TENA	0.467646	-1.09651	0.996752	1802.59	842.974
BMEI1739	-	ABC TRANSPORTER INTEGRAL MEMBRANE PROTEIN	0.769893	-0.377269	0.16264	1392.8	1072.3
BMEI1740	-	ALDEHYDE DEHYDROGENASE	0.635308	-0.654472	0.609364	2158.24	1371.15
BMEI1741	-	hypothetical protein BMEI1741	0.707335	-0.499535	0.0120213	35604.5	25184.3
BMEI1743	-	ABC TRANSPORTER ATP-BINDING PROTEIN	1.35783	0.441307	0.227545	1218.76	1654.87
BMEI1744	-	GLUCOSE-RESISTANCE AMYLASE REGULATOR	1.40658	0.492193	0.288044	1101.65	1549.56
BMEI1745	-	hypothetical protein BMEI1745	1.947	0.96125	0.976111	2173.73	4232.25
BMEI1746	-	ALCOHOL DEHYDROGENASE	1.7605	0.815989	0.517281	9538.19	16792
BMEI1747	-	ALDEHYDE DEHYDROGENASE	3.55648	1.83045	1	4243.84	15093.1
BMEI1748	-	TRANSCRIPTIONAL REGULATOR	2.04733	1.03374	0.989944	2527.86	5175.37
BMEI1749	glpD	glycerol-3-phosphate dehydrogenase	1.07072	0.0985748	0.0634952	980.965	1050.33
BMEI1750	-	GLYCEROL-3-PHOSPHATE REGULON REPRESSOR	0.974039	-0.0379482	0.0674569	1796.86	1750.21
BMEI1751	-	TWO COMPONENT RESPONSE REGULATOR	1.13261	0.179648	0.0480317	671.446	760.485
BMEI1752	-	TRANSCRIPTION REGULATOR, CRP FAMILY	0.9921	-0.0114426	0.0600426	1029.52	1021.38
BMEI1753	-	CYSQ PROTEIN	0.961832	-0.0561427	0.0449819	787.892	757.82
BMEI1754	-	bifunctional sulfate adenylyltransferase subunit 1/adenylylsulfate kinase protein	1.11124	0.152173	0.0446465	672.711	747.545
BMEI1755	-	sulfate adenylyltransferase subunit 2	1.04863	0.0685024	0.0333086	633.143	663.931
BMEI1756	-	hypothetical protein BMEI1756	1.13154	0.178292	0.0131645	413.856	468.296
BMEI1757	-	aminotransferase	0.902956	-0.147273	0.05915	3055.95	2759.38
BMEI1758	-	TRANSCRIPTIONAL ACTIVATOR, LUXR FAMILY	2.36528	1.24201	0.999704	1726.43	4083.49
BMEI1759	metH	B12-dependent methionine synthase	0.889754	-0.168521	0.0473961	4116.58	3662.75
BMEI1760	-	hypothetical protein BMEI1760	0.790658	-0.338874	0.0718005	749.449	592.558
BMEI1761	-	hypothetical protein BMEI1761	1.18322	0.242713	0.0695943	747.556	884.52
BMEI1762	-	O-6-METHYLGUANINE-DNA-ALKYLTRANSFERASE	1.25394	0.326468	0.0849071	674.931	846.323
BMEI1763	-	hypothetical protein BMEI1763	1.3495	0.432421	0.18277	2318.9	3129.34
BMEI1764	-	OXIDOREDUCTASE	1.23993	0.310259	0.124457	1141.21	1415.02
BMEI1765	-	phosphoadenosine phosphosulfate reductase	1.21962	0.286428	0.0624014	625.515	762.888
BMEI1766	-	SULFITE REDUCTASE (FERREDOXIN)	1.36531	0.449227	0.225276	1009.44	1378.2
BMEI1767	-	hypothetical protein BMEI1767	1.2611	0.334679	0.1273	959.005	1209.4
BMEI1768	-	UROPORPHYRIN-III C-METHYLTRANSFERASE / PRECORRIN-2 OXIDASE / FERROCHELATASE	1.0437	0.0617068	0.0309394	614.688	641.55
BMEI1769	-	hypothetical protein BMEI1769	1.15922	0.21316	0.0374143	562.292	651.823
BMEI1770	-	METHYLTRANSFERASE	1.3654	0.449322	0.219681	955.181	1304.2
BMEI1771	-	coproporphyrinogen III oxidase	1.24281	0.31361	0.10862	872.962	1084.93
BMEI1772	-	putative deoxyribonucleotide triphosphate pyrophosphatase	1.05799	0.0813197	0.0696544	1227.78	1298.97
BMEI1773	-	LACTOYLGLUTATHIONE LYASE, PUTATIVE	1.12001	0.163512	0.0553798	757.527	848.438
BMEI1774	-	LACTOYLGLUTATHIONE LYASE, PUTATIVE	1.60297	0.68075	0.623694	2124.61	3405.7
BMEI1775	rph	ribonuclease PH	1.32014	0.400687	0.176359	1845.28	2436.02
BMEI1776	hrcA	heat-inducible transcription repressor	0.55772	-0.842388	0.913417	1687.25	941.012
BMEI1777	-	GRPE PROTEIN	0.21022	-2.25003	1	10369.7	2179.91
BMEI1778	-	TRANSPORTER	0.664985	-0.588607	0.298022	5649.22	3756.64
BMEI1779	-	FRUCTOKINASE	1.31763	0.397947	0.165008	2075.29	2734.46
BMEI1780	-	hypothetical protein BMEI1780	0.834979	-0.260188	0.0459358	680.444	568.157
BMEI1781	-	CysZ-like protein	0.362654	-1.46333	0.999995	4192.53	1520.44
BMEI1782	-	ENDONUCLEASE III	0.849859	-0.234705	0.0792866	1010.14	858.476
BMEI1783	-	Hypothetical Membrane Spanning Protein	1.07645	0.106276	0.0731301	1590.5	1712.09
BMEI1784	-	SMALL HEAT SHOCK PROTEIN HSPA	0.417716	-1.25941	0.996591	36196	15119.7
BMEI1785	-	hypothetical protein BMEI1785	0.396987	-1.33284	0.999614	21921.8	8702.67
BMEI1786	-	NITROGEN REGULATORY IIA PROTEIN	0.91264	-0.131882	0.0698446	2253.82	2056.93
BMEI1787	-	putative sigma54 modulation protein / SSU ribosomal protein S30P	1.6733	0.742695	0.565376	4821.14	8067.2
BMEI1788	-	hypothetical protein BMEI1788	3.03192	1.60023	0.999999	3387.69	10271.2
BMEI1789	-	RNA polymerase factor sigma-54	0.979129	-0.0304285	0.044423	782.071	765.749
BMEI1790	-	ABC TRANSPORTER ATP-BINDING PROTEIN	1.1551	0.208018	0.0750571	2389.86	2760.53
BMEI1791	-	Hypothetical Periplasmic Protein	1.23308	0.302261	0.109566	2098.12	2587.14
BMEI1792	-	hypothetical protein BMEI1792	1.13577	0.183665	0.0608128	2913.37	3308.9
BMEI1793	-	PUTATIVE PROTEASE IV	0.7633	-0.389679	0.146344	1078.12	822.928
BMEI1794	ihfB	integration host factor subunit beta	0.825415	-0.276808	0.0147527	13311.2	10987.3
BMEI1795	-	hypothetical protein BMEI1795	0.634176	-0.657045	0.61393	1833.4	1162.7
BMEI1796	-	METHYLTRANSFERASE	0.680338	-0.555677	0.361719	1267.55	862.365
BMEI1797	-	METHYLTRANSFERASE	0.913931	-0.129842	0.0660306	1050.85	960.407
BMEI1798	-	23S ribosomal RNA methyltransferase	0.93084	-0.103395	0.0532973	874.941	814.43
BMEI1799	-	LIPOPROTEIN SIGNAL PEPTIDASE	1.00945	0.0135746	0.0652649	1180.55	1191.71
BMEI1800	-	Hypothetical Cytosolic Protein	0.706294	-0.501659	0.3052	2112.85	1492.29
BMEI1801	-	DNA mismatch repair protein	1.06447	0.0901351	0.0411928	694.617	739.399
BMEI1803	-	NADP-DEPENDENT MALIC ENZYME	1.28511	0.361889	0.095606	652.504	838.537
BMEI1804	-	PII uridylyl-transferase	1.02302	0.0328293	0.0667114	1223.67	1251.84
BMEI1805	-	VIRULENCE FACTOR MVIN	0.909513	-0.136833	0.0741004	1256.49	1142.8
BMEI1806	-	tryptophanyl-tRNA synthetase	0.853628	-0.228321	0.0934124	1346.05	1149.03
BMEI1807	-	Hypothetical Cytosolic Protein	0.968724	-0.0458418	0.059081	1003.34	971.955
BMEI1808	-	NIFU PROTEIN	0.412166	-1.2787	0.999855	3240.25	1335.52
BMEI1809	-	PROTEIN YBIS PRECURSOR	2.33401	1.22281	0.999621	1121.22	2616.94
BMEI1810	-	hypothetical protein BMEI1810	1.40409	0.489632	0.249797	835.456	1173.05
BMEI1811	-	ACID TOLERANCE REGULATORY PROTEIN ACTR	1.39415	0.479389	0.196427	2950.54	4113.51
BMEI1812	-	hypothetical protein BMEI1812	1.58127	0.66108	0.454966	3615.1	5716.43
BMEI1813	-	hypothetical protein BMEI1813	1.55268	0.634757	0.553421	1665.34	2585.73
BMEI1814	-	TRANSPOSASE	1.25002	0.321946	0.10045	2678.95	3348.73
BMEI1815	-	TRANSPOSASE	1.30071	0.379297	0.154832	1987.48	2585.13
BMEI1816	-	Sensory Transduction Protein Kinase	1.25733	0.330364	0.114029	849.648	1068.29
BMEI1817	-	ATP-DEPENDENT HELICASE HRPB	1.09978	0.137211	0.0581028	827.41	909.967
BMEI1818	-	ATP-DEPENDENT HELICASE HRPB	1.17172	0.228628	0.0757138	836.582	980.24
BMEI1819	-	ALCOHOL DEHYDROGENASE CLASS III	0.965546	-0.0505834	0.0146813	8594.82	8298.69
BMEI1820	-	ACETYLTRANSFERASE	0.820617	-0.285219	0.0988055	2745.81	2253.26
BMEI1821	-	hypothetical protein BMEI1821	0.713471	-0.487073	0.153348	5696.62	4064.38
BMEI1822	-	S-FORMYLGLUTATHIONE HYDROLASE	0.788825	-0.342224	0.0920065	4140.69	3266.28
BMEI1823	gyrB	DNA gyrase subunit B	0.656169	-0.607861	0.270814	7263.65	4766.18
BMEI1824	-	ATP-DEPENDENT RNA HELICASE DEAD	2.23734	1.16178	0.998928	979.502	2191.48
BMEI1825	-	DNA polymerase I	1.05454	0.0766123	0.0511172	815.461	859.936
BMEI1826	-	hypothetical protein BMEI1826	0.977676	-0.0325722	0.0443197	780.956	763.522
BMEI1827	-	hypothetical protein BMEI1827	0.887758	-0.171762	0.0654652	2897.1	2571.92
BMEI1828	-	RIBONUCLEASE D	0.863793	-0.211242	0.09146	1734.96	1498.64
BMEI1829	-	25 KDA OUTER-MEMBRANE IMMUNOGENIC PROTEIN PRECURSOR	0.885949	-0.174704	0.000852968	57407.2	50859.8
BMEI1830	-	25 KDA OUTER-MEMBRANE IMMUNOGENIC PROTEIN PRECURSOR	1.33958	0.421779	0.167725	2443.96	3273.87
BMEI1831	-	PENICILLIN-BINDING PROTEIN 1A	1.07945	0.110295	0.0724356	1714.02	1850.19
BMEI1832	-	FIXR PROTEIN	0.751425	-0.4123	0.192768	2215.79	1665
BMEI1833	-	FRUCTOKINASE	0.757795	-0.40012	0.18148	1425.34	1080.12
BMEI1834	-	UBIQUINONE/MENAQUINONE BIOSYNTHESIS METHYLTRANSFERASE UBIE	1.15983	0.213913	0.0871951	1077.37	1249.56
BMEI1835	-	N-methyl-D-aspartate receptor	0.551241	-0.859245	0.93313	2200	1212.73
BMEI1836	-	nicotinate phosphoribosyltransferase	1.14634	0.197033	0.0692391	844.021	967.533
BMEI1837	-	CELLOBIOSE-PHOSPHORYLASE	0.981001	-0.0276739	0.0686434	1528.36	1499.32
BMEI1838	-	SULFATE TRANSPORT ATP-BINDING PROTEIN CYSA	1.28118	0.35747	0.154429	1460.63	1871.33
BMEI1839	-	SULFATE TRANSPORT SYSTEM PERMEASE PROTEIN CYSW	1.17113	0.227906	0.084256	946.915	1108.96
BMEI1840	-	SULFATE TRANSPORT SYSTEM PERMEASE PROTEIN CYST	1.61122	0.68815	0.616851	2420.38	3899.76
BMEI1841	-	SULFATE-BINDING PROTEIN PRECURSOR	2.51272	1.32925	0.999932	1907.27	4792.44
BMEI1842	-	hypothetical protein BMEI1842	3.54804	1.82702	1	6259.31	22208.3
BMEI1843	-	hypothetical protein BMEI1843	1.30337	0.382251	0.172321	1242.84	1619.89
BMEI1844	-	hypothetical protein BMEI1844	1.10216	0.140334	0.0765767	1239.68	1366.33
BMEI1845	-	TRANSCRIPTIONAL REGULATORY PROTEIN, ASNC FAMILY	0.842525	-0.247208	0.0929099	1183.05	996.751
BMEI1846	-	EXSF PROTEIN	2.70619	1.43626	0.999941	9022.87	24417.6
BMEI1847	-	hypothetical protein BMEI1847	2.33949	1.22619	0.998693	5631.84	13175.6
BMEI1848	-	dihydroxy-acid dehydratase	1.25358	0.326053	0.108303	2475.07	3102.69
BMEI1849	-	THIOL:DISULFIDE INTERCHANGE PROTEIN CYCY PRECURSOR	0.878816	-0.186367	0.0845048	1386.66	1218.62
BMEI1850	-	HEME EXPORTER PROTEIN D	0.563721	-0.826946	0.904969	2271.17	1280.31
BMEI1851	-	HEME EXPORTER PROTEIN C	0.494048	-1.01728	0.991045	2373.49	1172.62
BMEI1852	-	HEME EXPORTER PROTEIN B	1.11204	0.15321	0.0791991	1287.78	1432.07
BMEI1853	-	HEME EXPORTER PROTEIN A	1.10928	0.149622	0.0792346	1384.16	1535.41
BMEI1855	-	aconitate hydratase	0.542516	-0.882262	0.900884	6630.98	3597.41
BMEI1856	-	hypothetical protein BMEI1856	0.435321	-1.19985	0.999433	2358.48	1026.7
BMEI1857	-	Hypothetical Cytosolic Protein	0.944202	-0.0828332	0.0714888	1571.29	1483.61
BMEI1858	-	PHOSPHINOTHRICIN N-ACETYLTRANSFERASE	0.99082	-0.0133048	0.0651889	1188.44	1177.53
BMEI1859	-	INTEGRAL MEMBRANE PROTEIN	0.44644	-1.16346	0.979612	38526.7	17199.9
BMEI1860	-	hypothetical transmembrane oxidoreductase	0.972161	-0.0407322	0.0475849	821.159	798.299
BMEI1861	-	ARYLESTERASE PRECURSOR	0.809782	-0.304394	0.0298482	9042.97	7322.84
BMEI1862	-	2'-5' RNA LIGASE	1.33958	0.421777	0.17762	2229.59	2986.71
BMEI1863	-	LOW MOLECULAR WEIGHT PHOSPHOTYROSINE PROTEIN PHOSPHATASE	1.32187	0.402583	0.181618	1743.85	2305.14
BMEI1864	phhB	pterin-4-alpha-carbinolamine dehydratase	3.06332	1.61509	1	2228.74	6827.34
BMEI1865	-	hypothetical protein BMEI1865	0.474648	-1.07507	0.988923	9913.52	4705.43
BMEI1866	-	hypothetical protein BMEI1866	0.933718	-0.0989411	0.00357387	22163.2	20694.2
BMEI1867	-	FLORFENICOL RESISTANCE PROTEIN	1.03854	0.0545499	0.0568942	2525.45	2622.77
BMEI1868	-	hypothetical protein BMEI1868	1.07332	0.102082	0.0713349	1213.2	1302.16
BMEI1869	-	HOMOSERINE/HOMOSERINE LACTONE EFFLUX PROTEIN	0.950747	-0.0728673	0.0520681	874.478	831.407
BMEI1870	-	argininosuccinate synthase	0.713765	-0.486478	0.271743	2482.07	1771.62
BMEI1871	-	hypothetical protein BMEI1871	0.983554	-0.0239241	0.0484348	831.939	818.257
BMEI1872	-	CELL SURFACE PROTEIN	1.3222	0.402938	0.190326	1309.99	1732.07
BMEI1873	-	CELL SURFACE PROTEIN	3.8152	1.93176	1	2409.22	9191.66
BMEI1874	-	hypothetical protein BMEI1874	1.07071	0.0985739	0.0125261	436.37	467.228
BMEI1875	-	Hypothetical Cytosolic Protein	1.20187	0.26528	0.0581248	631.482	758.959
BMEI1876	dnaE2	error-prone DNA polymerase	1.32464	0.405604	0.177491	965.795	1279.33
BMEI1877	-	HEMOLYSIN III	1.11106	0.151937	0.077229	1746.41	1940.36
BMEI1878	-	SOLUBLE LYTIC MUREIN TRANSGLYCOSYLASE	1.10834	0.148396	0.0783058	1599.62	1772.92
BMEI1879	-	Hypothetical Cytosolic Protein	1.09295	0.128231	0.0168011	7896.25	8630.22
BMEI1880	-	Hypothetical Membrane Spanning Protein	0.536333	-0.8988	0.956194	1887.37	1012.26
BMEI1881	-	hypothetical protein BMEI1881	0.46737	-1.09736	0.997187	2348.02	1097.39
BMEI1882	-	fumarylpyruvate hydrolase	0.924267	-0.113619	0.0655722	1071.84	990.668
BMEI1883	frcK	putative fructose transport system kinase	1.10381	0.142489	0.0478702	711.581	785.449
BMEI1884	-	Dienelactone hydrolase and related enzyme	1.03902	0.0552302	0.0693041	1600.81	1663.28
BMEI1885	-	TRANSCRIPTIONAL REGULATORY PROTEIN, LYSR FAMILY	1.09022	0.124625	0.0566999	829.04	903.84
BMEI1886	-	phosphoglucomutase	0.90683	-0.141096	0.0712265	2249.27	2039.7
BMEI1887	-	MRP PROTEIN	0.586155	-0.770645	0.834714	2098.49	1230.04
BMEI1888	-	LACTOYLGLUTATHIONE LYASE	0.906676	-0.141342	0.0461066	768.212	696.519
BMEI1889	-	hypothetical protein BMEI1889	0.89266	-0.163818	0.0785195	2002.11	1787.2
BMEI1890	-	TRANSPORTER	1.47813	0.563775	0.414601	1183.07	1748.74
BMEI1891	-	hypothetical protein BMEI1891	1.59422	0.672848	0.596054	790.861	1260.8
BMEI1892	-	Hypothetical cytosolic protein (cysteine-rich)	2.40589	1.26657	0.999773	757.04	1821.36
BMEI1893	-	PROTEIN YBIS PRECURSOR	1.01983	0.0283338	0.055501	2584.19	2635.45
BMEI1894	-	GRAMICIDIN S BIOSYNTHESIS GRST PROTEIN	1.46072	0.546677	0.203349	4352.28	6357.45
BMEI1895	-	OUTER MEMBRANE PROTEIN	1.31161	0.391336	0.0978132	3843.25	5040.84
BMEI1896	-	Hypothetical Membrane Spanning Protein	1.20836	0.273048	0.101367	990.088	1196.38
BMEI1897	-	hypothetical protein BMEI1897	0.974153	-0.0377797	0.00139465	292.308	284.753
BMEI1898	-	CYTOCHROME O UBIQUINOL OXIDASE OPERON PROTEIN CYOD	0.430503	-1.21591	0.999457	1741.03	749.516
BMEI1899	-	CYTOCHROME O UBIQUINOL OXIDASE SUBUNIT III	0.415914	-1.26564	0.999811	3717.78	1546.28
BMEI1900	-	CYTOCHROME O UBIQUINOL OXIDASE SUBUNIT I	0.353571	-1.49993	0.999997	7139.67	2524.38
BMEI1901	-	CYTOCHROME O UBIQUINOL OXIDASE SUBUNIT II	0.370821	-1.43121	0.999991	3792.08	1406.18
BMEI1902	-	Molybdopterin biosynthesis enzyme	1.08319	0.115287	0.0244854	533.914	578.33
BMEI1903	-	CYTOCHROME C-552	0.573551	-0.802007	0.85635	3606.22	2068.35
BMEI1904	-	3-deoxy-manno-octulosonate cytidylyltransferase	0.876345	-0.19043	0.0868575	1574.08	1379.43
BMEI1905	-	prephenate dehydratase	0.896348	-0.15787	0.0736155	2266.56	2031.63
BMEI1907	-	HIT1 PROTEIN	1.30786	0.387208	0.170439	1074.4	1405.17
BMEI1908	-	DNA polymerase III subunits gamma and tau	0.737213	-0.439846	0.227026	1834.55	1352.45
BMEI1909	-	hypothetical protein BMEI1909	0.646323	-0.629674	0.468244	4029.52	2604.37
BMEI1910	recR	recombination protein RecR	0.785964	-0.347464	0.110654	3444.52	2707.27
BMEI1911	-	MEMBRANE-BOUND LYTIC MUREIN TRANSGLYCOSYLASE B	1.12757	0.173218	0.0802589	1145.32	1291.43
BMEI1912	-	SUGAR TRANSPORTER	1.01969	0.028134	0.0336245	653.237	666.101
BMEI1913	-	TRANSCRIPTIONAL REGULATORY PROTEIN, LYSR FAMILY	1.27146	0.346491	0.130607	921.168	1171.23
BMEI1914	-	Hypothetical Membrane Spanning Protein	1.28178	0.358148	0.122483	801.62	1027.5
BMEI1915	rpsA	30S ribosomal protein S1	0.610304	-0.7124	0.0794089	37170.5	22685.3
BMEI1916	cmk	cytidylate kinase	1.09319	0.128543	0.075019	1246.79	1362.98
BMEI1917	-	3-phosphoshikimate 1-carboxyvinyltransferase	0.868045	-0.204159	0.0740748	1019.66	885.108
BMEI1918	-	Hypothetical Cytosolic Protein	0.83024	-0.268399	0.0683876	831.267	690.151
BMEI1919	-	ACYLTRANSFERASE	0.971193	-0.0421706	0.0677987	1305.42	1267.81
BMEI1920	-	hypothetical protein BMEI1920	1.31289	0.392751	0.181311	1406.98	1847.22
BMEI1922	-	ACETOACETYL-COA SYNTHETASE	1.08498	0.11767	0.0509911	770.845	836.352
BMEI1923	-	ISOVALERYL-COA DEHYDROGENASE	1.25095	0.323021	0.045985	5623.83	7035.11
BMEI1924	-	METHYLCROTONYL-COA CARBOXYLASE	0.851683	-0.231612	0.0970991	1729.29	1472.8
BMEI1925	-	acetyl-CoA carboxylase alpha chain / propionyl-CoA carboxylase alpha chain	0.950808	-0.0727747	0.0469368	3409.36	3241.65
BMEI1926	-	hydroxymethylglutaryl-CoA lyase	0.80723	-0.308948	0.125658	1916.76	1547.27
BMEI1927	-	ENOYL-COA HYDRATASE	0.979353	-0.030099	0.0163979	7835.3	7673.52
BMEI1928	-	ENOYL-COA HYDRATASE	1.20502	0.269062	0.0984022	966.547	1164.71
BMEI1929	-	hypothetical protein BMEI1929	2.43819	1.28581	0.999789	2938.99	7165.82
BMEI1930	-	LEUCINE-, ISOLEUCINE-, VALINE-, THREONINE-, AND ALANINE-BINDING PROTEIN PRECURSOR	1.03383	0.0479986	0.0345839	4305.86	4451.53
BMEI1931	-	hypothetical protein BMEI1931	1.31169	0.391428	0.144447	803.967	1054.56
BMEI1932	-	Hypothetical Cytosolic Protein	1.89678	0.923552	0.92871	4106.8	7789.69
BMEI1933	-	hypothetical protein BMEI1933	1.43539	0.521447	0.329311	1045.35	1500.49
BMEI1934	-	PERIPLASMIC OLIGOPEPTIDE-BINDING PROTEIN PRECURSOR	0.97199	-0.0409862	0.0555256	2668.01	2593.28
BMEI1935	-	OLIGOPEPTIDE-BINDING PROTEIN APPA PRECURSOR	1.39221	0.477378	0.270887	1481.74	2062.9
BMEI1936	-	OLIGOPEPTIDE TRANSPORT SYSTEM PERMEASE PROTEIN OPPB	0.927167	-0.109099	0.0463678	3672.27	3404.8
BMEI1937	-	OLIGOPEPTIDE TRANSPORT SYSTEM PERMEASE PROTEIN OPPC	1.12566	0.170773	0.0578744	2987.65	3363.08
BMEI1938	-	OLIGOPEPTIDE TRANSPORT ATP-BINDING PROTEIN OPPD	1.40561	0.491196	0.291507	1419.2	1994.84
BMEI1939	-	D-3-PHOSPHOGLYCERATE DEHYDROGENASE	1.19269	0.254216	0.0261713	7084.52	8449.62
BMEI1940	-	molybdopterin biosynthesis protein MoeB	1.23364	0.302921	0.0818892	3124.94	3855.05
BMEI1941	recF	recombination protein F	1.04183	0.0591131	0.0364677	667.583	695.505
BMEI1942	-	DNA polymerase III subunit beta	0.931952	-0.101673	0.0437582	3840.17	3578.85
BMEI1943	dnaA	chromosomal replication initiation protein	1.05955	0.0834472	0.00525734	16253.8	17221.7
BMEI1944	rpsT	30S ribosomal protein S20	0.959079	-0.0602784	0.0203556	6876.41	6595.02
BMEI1945	-	enoyl-CoA hydratase	0.656772	-0.606536	0.443314	3518.68	2310.97
BMEI1946	-	formamidopyrimidine-DNA glycosylase	0.88627	-0.174182	0.0728038	1080.06	957.222
BMEI1947	-	Hypothetical Cytosolic Protein	0.805637	-0.311799	0.124967	1406.98	1133.51
BMEI1948	-	CYTOSOL AMINOPEPTIDASE	0.747314	-0.420214	0.173719	1123.4	839.53
BMEI1949	-	TRANSCRIPTIONAL REGULATOR, MARR FAMILY	0.822924	-0.281169	0.113464	1496.06	1231.14
BMEI1950	-	GAMMA-D-GLUTAMYL-L-DIAMINO ACID ENDOPEPTIDASE II	1.1598	0.213878	0.0898758	1702.41	1974.46
BMEI1951	-	PUTATIVE HYDROLASE	1.0593	0.0831125	0.0631277	1003.51	1063.02
BMEI1952	-	2-hydroxyacid dehydrogenase	0.99457	-0.00785526	0.0599891	2300.25	2287.76
BMEI1953	-	ASPARTYL-TRNA SYNTHETASE	0.782161	-0.354462	0.138724	1222.96	956.548
BMEI1954	-	ABC TRANSPORTER SUBSTRATE BINDING PROTEIN	0.836918	-0.256842	0.105109	1754.81	1468.63
BMEI1955	-	FERRIC UPTAKE REGULATION PROTEIN	0.324043	-1.62574	1	3810.45	1234.75
BMEI1956	-	3-hydroxydecanoyl-(acyl carrier protein) dehydratase	0.872312	-0.197084	0.046211	4561.42	3978.98
BMEI1957	-	3-oxoacyl-(acyl carrier protein) synthase I	0.767487	-0.381785	0.0993986	4715.14	3618.81
BMEI1958	-	enoyl-(acyl carrier protein) reductase	1.02734	0.0389153	0.0659996	1883.38	1934.87
BMEI1959	-	METHYLTRANSFERASE	1.09906	0.136266	0.0589881	840.077	923.292
BMEI1960	-	METHYLTRANSFERASE	0.977856	-0.0323065	0.0432362	768.276	751.263
BMEI1961	-	polynucleotide phosphorylase/polyadenylase	2.12147	1.08506	0.978962	8241.33	17483.7
BMEI1962	rpsO	30S ribosomal protein S15	1.58564	0.665069	0.0387727	27169.7	43081.5
BMEI1963	truB	tRNA pseudouridine synthase B	1.32103	0.40166	0.179954	1035.27	1367.62
BMEI1964	rbfA	ribosome-binding factor A	1.18532	0.245281	0.101456	1349.94	1600.12
BMEI1965	infB	translation initiation factor IF-2	1.20104	0.264281	0.075335	2944.39	3536.32
BMEI1966	-	hypothetical protein BMEI1966	1.11312	0.15461	0.0738186	1993.08	2218.54
BMEI1967	nusA	transcription elongation factor NusA	1.28742	0.364479	0.0941797	3526.25	4539.75
BMEI1968	-	hypothetical protein BMEI1968	1.1727	0.229834	0.0942554	1686.69	1977.99
BMEI1969	trmB	tRNA (guanine-N(7))-methyltransferase	0.861471	-0.215126	0.0842586	1165.81	1004.31
BMEI1970	-	S-adenosylmethionine synthetase	0.724152	-0.465635	0.0764547	9110.96	6597.72
BMEI1971	-	TRANSCRIPTIONAL REGULATOR	0.755871	-0.403788	0.162748	1135.9	858.597
BMEI1972	lnt	apolipoprotein N-acyltransferase	1.06185	0.0865737	0.071347	1330.08	1412.34
BMEI1973	-	CBS domain containing protein	0.512025	-0.965714	0.970043	5870.8	3006
BMEI1974	-	DIACYGLYCEROL KINASE	0.613687	-0.704425	0.442631	8516.31	5226.35
BMEI1975	-	PHOH PROTEIN	1.51589	0.600167	0.467266	1834.28	2780.57
BMEI1976	-	MIAB PROTEIN	1.12812	0.173923	0.082614	1261.93	1423.62
BMEI1977	-	1-ACYL-SN-GLYCEROL-3-PHOSPHATE ACYLTRANSFERASE	1.09384	0.129401	0.066948	979.18	1071.07
BMEI1978	-	RIBOSOMAL-PROTEIN-ALANINE ACETYLTRANSFERASE	0.988367	-0.0168818	0.0440739	776.498	767.464
BMEI1979	-	O-SIALOGLYCOPROTEIN ENDOPEPTIDASE	1.19559	0.25772	0.0920268	931.18	1113.31
BMEI1980	-	DNA starvation/stationary phase protection protein Dps	1.06736	0.094047	0.000574431	59722.6	63745.5
BMEI1982	-	hypothetical protein BMEI1982	1.66922	0.739173	0.595274	4258.66	7108.64
BMEI1983	-	SPORE-CORTEX-LYTIC ENZYME PREPEPTIDE PRECURSOR	0.767495	-0.381771	0.0416744	9599.63	7367.66
BMEI1984	-	PHOSPHATE REGULON TRANSCRIPTIONAL REGULATORY PROTEIN PHOB	1.162	0.216615	0.0846443	2023.3	2351.08
BMEI1985	-	PHOSPHATE TRANSPORT SYSTEM PROTEIN PHOU	0.797503	-0.326439	0.135297	1876.53	1496.53
BMEI1986	-	PHOSPHATE TRANSPORT ATP-BINDING PROTEIN PSTB	0.967948	-0.0469991	0.0546115	2748.8	2660.69
BMEI1987	-	PHOSPHATE TRANSPORT SYSTEM PERMEASE PROTEIN PSTA	0.798441	-0.324742	0.109485	1045.8	835.009
BMEI1988	-	PHOSPHATE TRANSPORT SYSTEM PERMEASE PROTEIN PSTC	0.897205	-0.15649	0.0800889	1479.95	1327.82
BMEI1989	-	PHOSPHATE-BINDING PERIPLASMIC PROTEIN	0.691905	-0.531353	0.337533	2620.17	1812.91
BMEI1990	-	Hypothetical Membrane Spanning Protein	0.637246	-0.650079	0.577673	1469.65	936.529
BMEI1991	-	hypothetical protein BMEI1991	0.343033	-1.54358	0.999999	4691.46	1609.33
BMEI1992	-	RARE LIPOPROTEIN A	0.799825	-0.322244	0.040789	7684.85	6146.54
BMEI1993	-	hypothetical protein BMEI1993	1.19916	0.26203	0.0781487	2794.93	3351.58
BMEI1994	-	MG(2+) CHELATASE FAMILY PROTEIN	1.27054	0.345436	0.0937451	679.014	862.711
BMEI1996	-	glutathione synthetase	0.898529	-0.154364	0.0713466	1106.76	994.455
BMEI1997	-	GLUCONOLACTONASE	1.51288	0.597298	0.234535	5156.7	7801.47
BMEI1998	-	Hypothetical Cytosolic Protein	1.15198	0.204112	0.0899985	1380.86	1590.72
BMEI1999	-	orotidine 5'-phosphate decarboxylase	1.05852	0.0820458	0.0632561	1008.42	1067.43
BMEI2000	-	PHOSPHATIDYLETHANOLAMINE N-METHYLTRANSFERASE / PHOSPHATIDYL-N-METHYLETHANOLAMINE N-METHYLTRANSFERASE	1.21215	0.277564	0.0491278	4639.64	5623.92
BMEI2001	-	CHAPERONE PROTEIN DNAJ	0.600879	-0.734855	0.504219	9074.98	5452.96
BMEI2002	dnaK	molecular chaperone DnaK	0.454007	-1.13921	0.973166	35625.3	16174.2
BMEI2003	-	TRANS-1,2-DIHYDROBENZENE-1,2-DIOL DEHYDROGENASE / D-xylose 1-dehydrogenase (NADP+)	0.856572	-0.223354	0.0948341	1705.1	1460.54
BMEI2004	pheT	phenylalanyl-tRNA synthetase subunit beta	0.854344	-0.22711	0.0945392	1422	1214.88
BMEI2005	pheS	phenylalanyl-tRNA synthetase subunit alpha	0.902152	-0.148557	0.079101	1551.02	1399.26
BMEI2006	-	Hypothetical Cytosolic Protein	0.917663	-0.123964	0.0639723	1020.88	936.82
BMEI2007	rplT	50S ribosomal protein L20	0.974117	-0.0378326	0.014382	8629.74	8406.38
BMEI2008	rpmI	50S ribosomal protein L35	0.900087	-0.151864	0.00604476	17421.8	15681.1
BMEI2009	-	NICKEL-COBALT-CADMIUM RESISTANCE PROTEIN NCCN	1.0339	0.0480958	0.0682353	1703.47	1761.21
BMEI2010	infC	translation initiation factor IF-3	1.31992	0.400452	0.0600517	6032.11	7961.91
BMEI2011	-	2-HYDROXYMUCONIC SEMIALDEHYDE HYDROLASE	0.797361	-0.326695	0.134379	1490.14	1188.18
BMEI2012	-	BENZOATE MEMBRANE TRANSPORT PROTEIN	1.09115	0.125845	0.0744572	1684.96	1838.54
BMEI2013	-	hypothetical protein BMEI2013	0.658025	-0.603785	0.492583	1662.88	1094.21
BMEI2014	-	Hypothetical Cytosolic Protein	0.912845	-0.131558	0.0495163	810.225	739.61
BMEI2015	-	zinc metallopeptidase	1.43183	0.517863	0.219239	3341.52	4784.5
BMEI2016	-	hypothetical protein BMEI2016	1.03864	0.0546992	0.0429018	3522.62	3658.75
BMEI2017	-	N-(5'-phosphoribosyl)anthranilate isomerase	1.22536	0.293211	0.119432	1297.8	1590.28
BMEI2018	-	tryptophan synthase subunit beta	1.01902	0.0271786	0.0498581	2966.71	3023.13
BMEI2019	trpA	tryptophan synthase subunit alpha	0.896981	-0.15685	0.0788309	1870.13	1677.47
BMEI2020	-	acetyl-CoA carboxylase subunit beta	0.674522	-0.568063	0.164881	8867.3	5981.19
BMEI2021	-	FOLYLPOLYGLUTAMATE SYNTHASE / DIHYDROFOLATE SYNTHASE	0.834717	-0.260642	0.102681	2088.52	1743.32
BMEI2022	-	THIOREDOXIN C-1	0.786657	-0.346193	0.0351373	9386.99	7384.34
BMEI2023	-	ATP-DEPENDENT NUCLEASE SUBUNIT A	1.20858	0.273311	0.0742118	719.841	869.984
BMEI2024	-	Hypothetical Cytosolic Protein	1.31164	0.391371	0.146755	817.891	1072.78
BMEI2025	-	MANNOSE-1-PHOSPHATE GUANYLTRANSFERASE	1.42411	0.51006	0.315162	1576.21	2244.69
BMEI2026	-	7.5 KDA CHLOROSOME PROTEIN	1.225	0.292782	0.109649	996.811	1221.09
BMEI2027	-	ALKALINE PHOSPHATASE SYNTHESIS SENSOR PROTEIN PHOR	1.68362	0.751563	0.791325	944.399	1590.01
BMEI2028	-	hypothetical protein BMEI2028	2.38707	1.25524	0.999689	684.922	1634.96
BMEI2029	-	S-adenosyl-L-homocysteine hydrolase	0.764098	-0.388171	0.0733616	6408.38	4896.63
BMEI2030	-	hypothetical protein BMEI2030	1.05266	0.0740349	0.0419515	713.404	750.97
BMEI2031	-	PHOSPHOCARRIER PROTEIN HPR	0.863743	-0.211326	0.0832861	2351.88	2031.42
BMEI2032	-	PTS SYSTEM, IIA COMPONENT	0.920734	-0.119144	0.0513825	3359.23	3092.96
BMEI2033	-	hypothetical protein BMEI2033	1.24085	0.311333	0.114089	2074.24	2573.83
BMEI2034	-	SENSOR PROTEIN CHVG	1.23175	0.300714	0.119032	1116.13	1374.8
BMEI2035	-	SENSOR PROTEIN CHVG	1.05106	0.0718503	0.0704747	1371.73	1441.77
BMEI2036	-	TRANSCRIPTIONAL REGULATORY PROTEIN CHVI	1.02295	0.0327421	0.0574923	2457.43	2513.84
BMEI2038	-	hypothetical protein BMEI2038	1.64127	0.714812	0.732178	1533.01	2516.08
BMEI2039	-	pantothenate kinase	0.964059	-0.0528061	0.0658572	1185.34	1142.73
[truncated: 1,110 more rows]
